# Supplementary material for: Temporal chunking as a mechanism for unsupervised learning of task-sets
Source: eLife journal article supplement (doi:10.7554/elife.50469), 2020-03-09
Supplement: supp [file elife-50469-supp-v1.zip]

Archive with 14 entries (14 files):
- elife_poa_e50469_Figure_8_figure_supplement_2.pdf
- elife_poa_e50469_Figure_3_figure_supplement_2.pdf
- elife_poa_e50469_Figure_6_figure_supplement_2.pdf
- elife_poa_e50469_Figure_8_figure_supplement_1.png
- elife_poa_e50469_Figure_5_figure_supplement_1.pdf
- elife_poa_e50469_Figure_3_figure_supplement_1.pdf
- elife_poa_e50469_Figure_6_figure_supplement_3.pdf
- elife_poa_e50469_Figure_5_figure_supplement_3.pdf
- elife_poa_e50469_Figure_6_figure_supplement_1.png
- elife_poa_e50469_Transparent_Reporting_File.docx
- elife_poa_e50469_Figure_5_source_data_1.xlsx
- elife_poa_e50469_Figure_8_source_data_1.xlsx
- elife_poa_e50469_Figure_8_source_data_2.xlsx
- elife_poa_e50469_Figure_5_figure_supplement_2.pdf
