# Supplementary material for: Temporal chunking as a mechanism for unsupervised learning of task-sets
Source: eLife journal article supplement (doi:10.7554/elife.50469), 2020-03-09
Supplement: supp [file elife-50469-supp-v1.zip › elife_poa_e50469_Figure_5_source_data_1.xlsx]

## Sheet: Figure5_sourcedata1
Model fitting and parameters in the two experiments, in the two sessions.
Experiment/model	DF	AIC	BIC	𝝰	1/𝝱	𝜺	QP	JINC
Experiment 1 (behavior only, N=22)
AN, Recurrent session	3	663 ± 12	671 ± 12	0.38 ± 0.007	0.15 ± 0.004	0.064 ± 0.004
AN, Open-Ended session	3	713 ± 14	720 ± 14	0.36 ± 0.007	0.15 ± 0.003	0.073 ± 0.004
AN-TN, Recurrent session	5	561 ± 17	573 ± 17	0.35 ± 0.007	0.16 ± 0.005	0.053 ± 0.004	0.17 ± 0.007	0.70 ± 0.037
AN-TN, Open-Ended session	5	687 ± 14	699 ± 14	0.34 ± 0.007	0.14 ± 0.002	0.072 ± 0.004	0.44 ± 0.015	0.16 ± 0.006
Experiment 2 (fMRI, N=40)
AN, Recurrent session	3	664 ± 13	671 ± 13	0.38 ± 0.006	0.17 ± 0.003	0.083 ± 0.004
AN, Open-Ended session	3	726 ± 16	733 ± 16	0.38 ± 0.006	0.19 ± 0.005	0.086 ± 0.003
AN-TN, Recurrent session	5	599 ± 14	611 ± 14	0.35 ± 0.007	0.17 ± 0.003	0.068 ± 0.004	0.23 ± 0.015	0.57 ± 0.035
AN-TN, Open-Ended session	5	706 ± 16	718 ± 16	0.36 ± 0.007	0.17 ± 0.004	0.082 ± 0.003	0.38 ± 0.015	0.18 ± 0.015
