# Supplementary material for: Temporal chunking as a mechanism for unsupervised learning of task-sets
Source: eLife journal article supplement (doi:10.7554/elife.50469), 2020-03-09
Supplement: supp [file elife-50469-supp-v1.zip › elife_poa_e50469_Figure_8_source_data_1.xlsx]

## Sheet: Figure8_SourceData1
Neural correlates of the trial-by-trial synaptic strength of the chosen association in the AN (Wchosen)
Contrast	Label	[ x y z ]	t-value	Cluster size
REC	Striatum and vmPFC	[-8 52 -12]	7.9	145
OE	Striatum and vmPFC	[0 52 -12]	8.4	217
Negative REC	dACC and pre-SMA	[4 20 48]	7.7	200
	right dlPFC	[36 24 -8]	7.8	212
	left dlPFC	[-32 20 4]	10.0	98
Negative OE	dACC and pre-SMA	[0 28 44]	10.8	156
	right dlPFC	[-32 24 -12]	9.1	62
	left dlPFC	[-32 24 0]	8.0	49
Neural correlates of the trial-by-trial inference signal strength (TN inference to AN)
Contrast	Label	[ x y z ]	t-value	Cluster size
REC	dACC and pre-SMA	[4 28 44]	8.9	93
	right dlPFC	[52 20 40]	10.1	544
	left dlPFC	[-40 52 -4]	7.8	74
Negative REC	vmPFC	[-4 60 24]	8.5	95
