# Supplementary material for: Temporal chunking as a mechanism for unsupervised learning of task-sets
Source: eLife journal article supplement (doi:10.7554/elife.50469), 2020-03-09
Supplement: supp [file elife-50469-supp-v1.zip › elife_poa_e50469_Figure_8_source_data_2.xlsx]

## Sheet: Figure8_SourceData2
Statistical differences of activations in the two sessions for TN inference in independent ROIs for dorsolateral prefrontal cortex
ROI	t-value	p-value
Stanford Functional Imaging in Neuropsychiatric Disorders Lab (Shirer et al., 2012)	4.4	3.8*10-5
Neurosynth (Yarkoni et al., 2011)	3.4	1.2*10-3
WFU PickAtlas, ROI of Brodmann 6, 8 and 9 (Lancaster et al., 2000; Maldjian et al., 2003)	2.4	1.8*10-2
WFU PickAtlas, ROI of Brodmann 44, 45, 46 (Lancaster et al., 2000; Maldjian et al., 2003)	2.9	4.4*10-3
Glasser Parcellation, dorsolateral PFC parcel (Glasser et al., 2016)	3.0	3.6*10-3
Glasser Parcellation, parcel 8Av (Glasser et al., 2016)	3.9	1.8*10-4
Glasser Parcellation, parcel 8C (Glasser et al., 2016)	3.6	5.7*10-4
Glasser Parcellation, parcel p9-46v (Glasser et al., 2016)	4.0	1.3*10-4
Glasser Parcellation, parcel a9-46v (Glasser et al., 2016)	4.2	6.6*10-5
Glasser Parcellation, parcel 46 (Glasser et al., 2016)	2.0	4.5*10-2
Glasser Parcellation, parcel 9-46d (Glasser et al., 2016)	2.1	4.2*10-2
Glasser Parcellation, parcel i6-8 (Glasser et al., 2016)	4.2	7.5*10-5
Glasser Parcellation, parcel s6-8 (Glasser et al., 2016)	3.3	1.3*10-3
Statistical differences of activations in the two sessions for TN inference in independent ROIs for dorsolateral prefrontal cortex
ROI	t-value	p-value
Glasser Parcellation, mPFC parcel 8BM (Glasser et al., 2016)	2.4	2.1*10-2
Glasser Parcellation, SMA parcel SCEF (Glasser et al., 2016)	2.0	4.7*10-2
Glasser Parcellation, SMA parcel 6ma (Glasser et al., 2016)	2.1	3.8*10-2
WFU PickAtlas, ROI of Brodmann 8 and 32 (Lancaster et al., 2000; Maldjian et al., 2003)	2.2	3.5*10-2
10mm-radius spherical volume centered on the peak monitoring pre-SMA in (Behrens et al., 2007)	3.2	2.3*10-3
