# Supplementary figures and images for: Temporal chunking as a mechanism for unsupervised learning of task-sets
Source: eLife journal article supplement (doi:10.7554/elife.50469), 2020-03-09

# Recurrent session

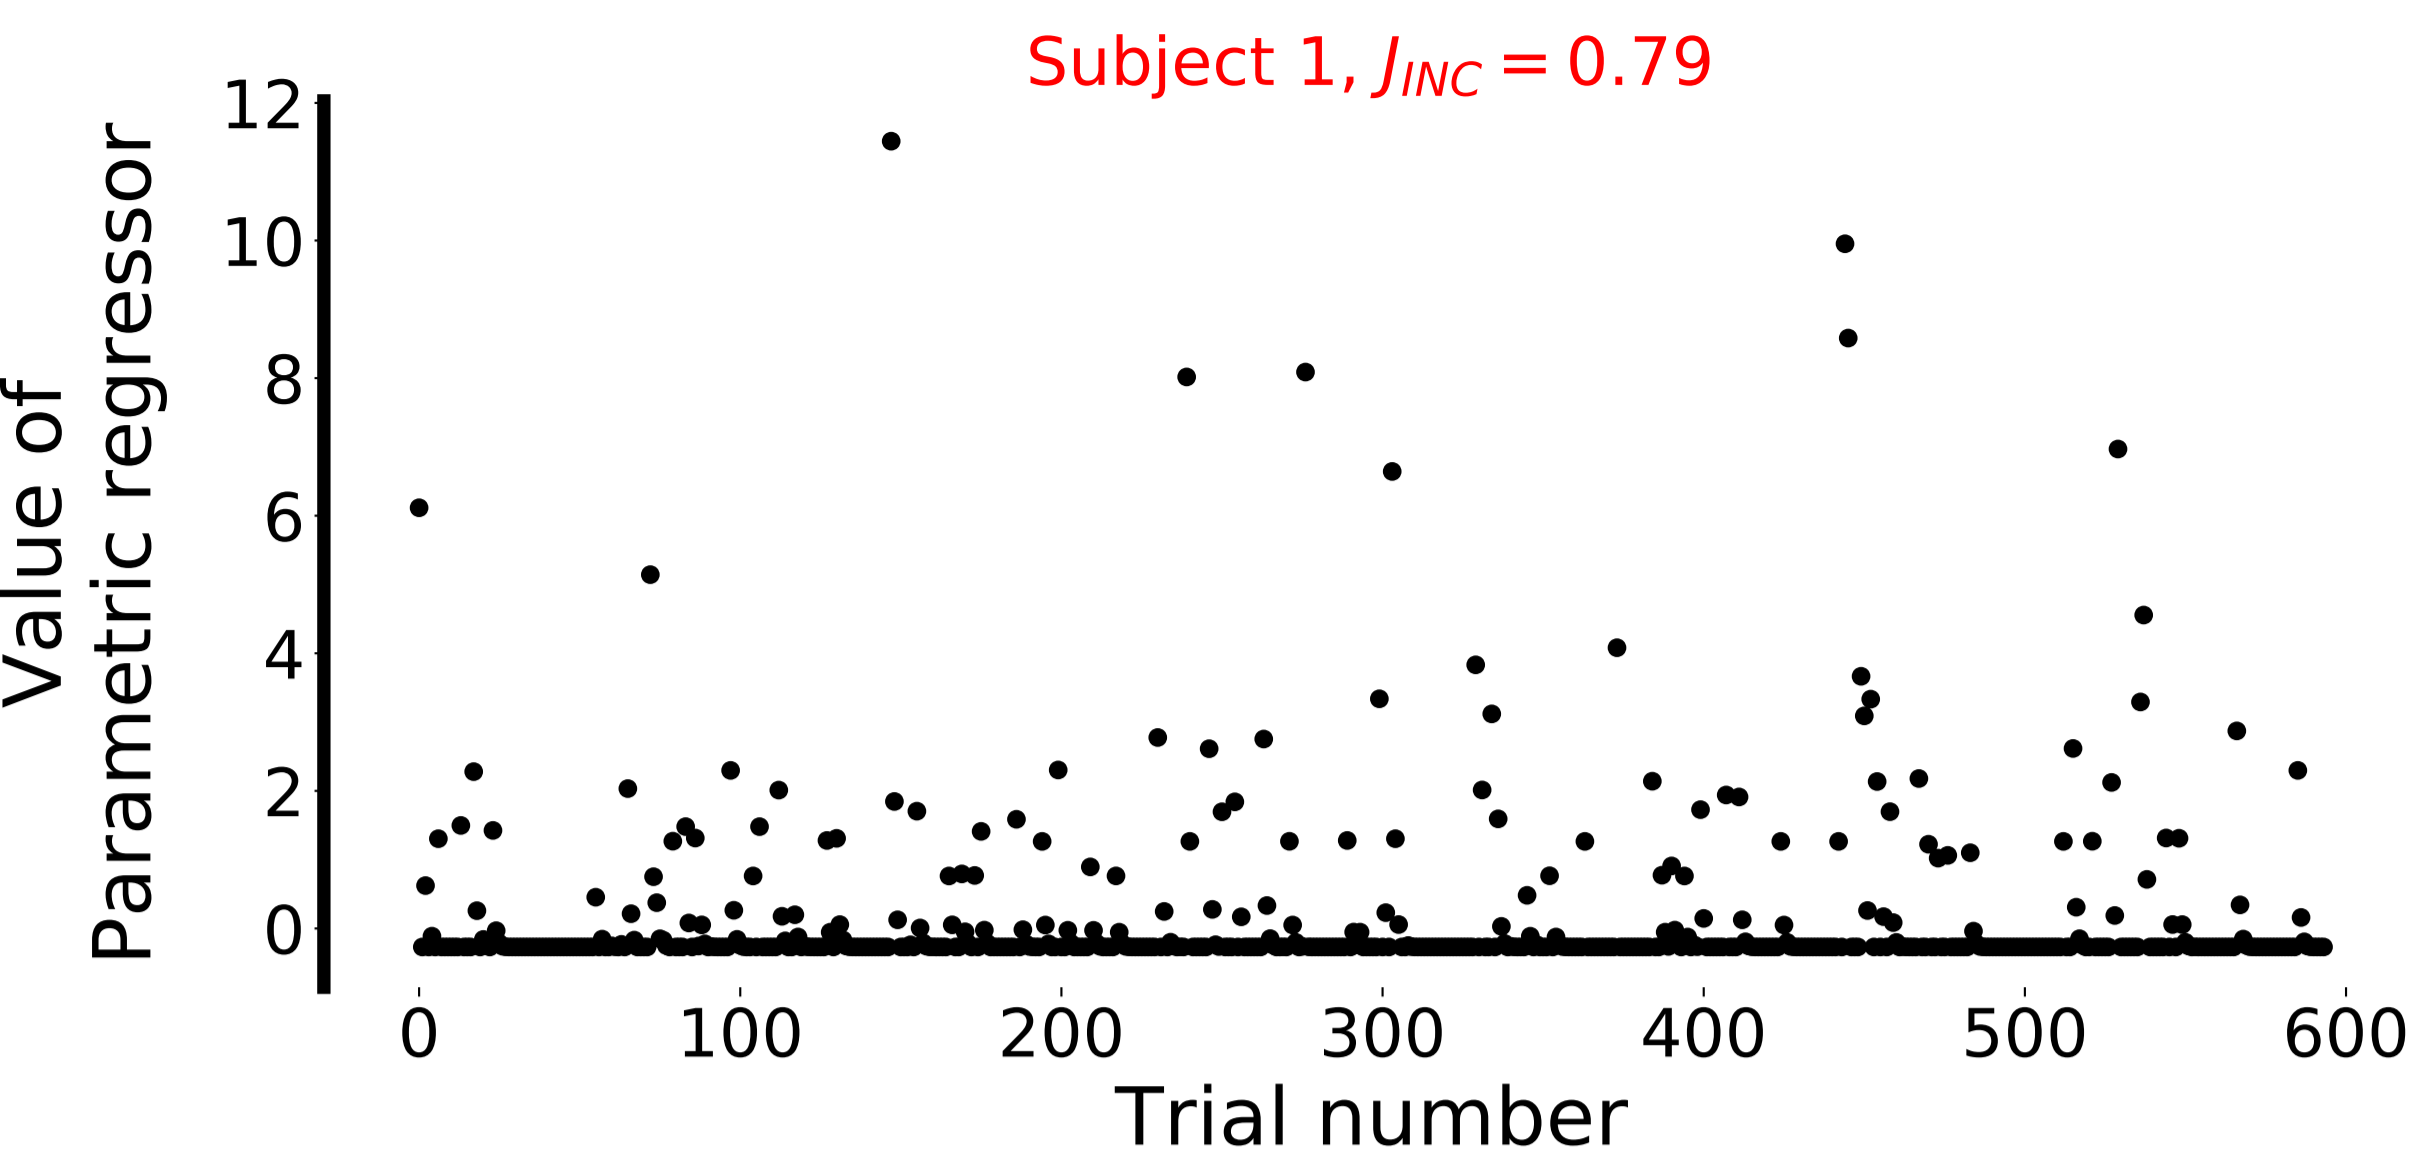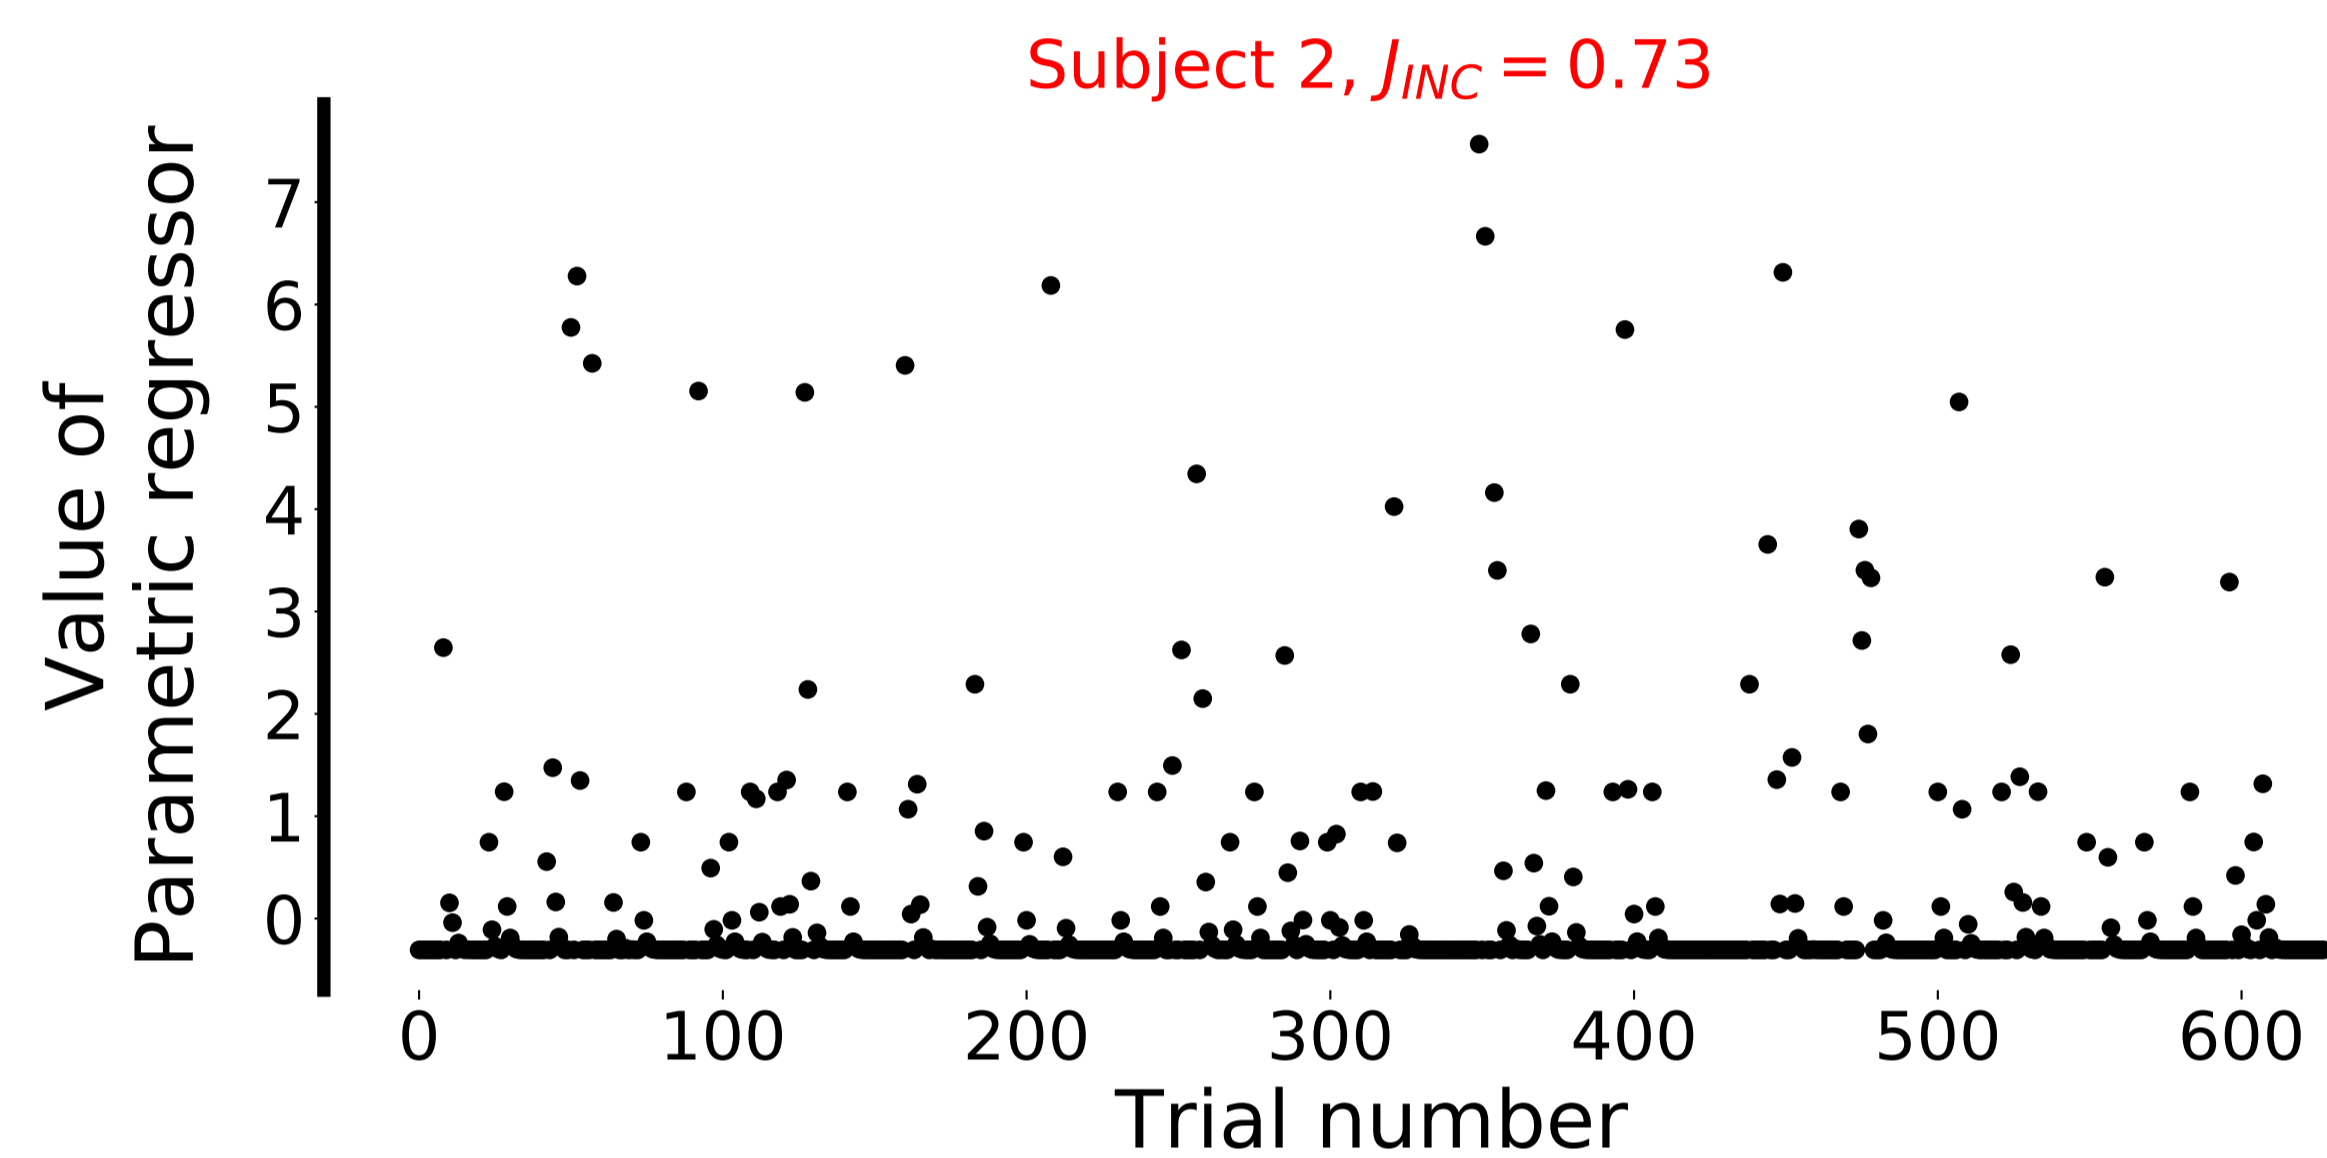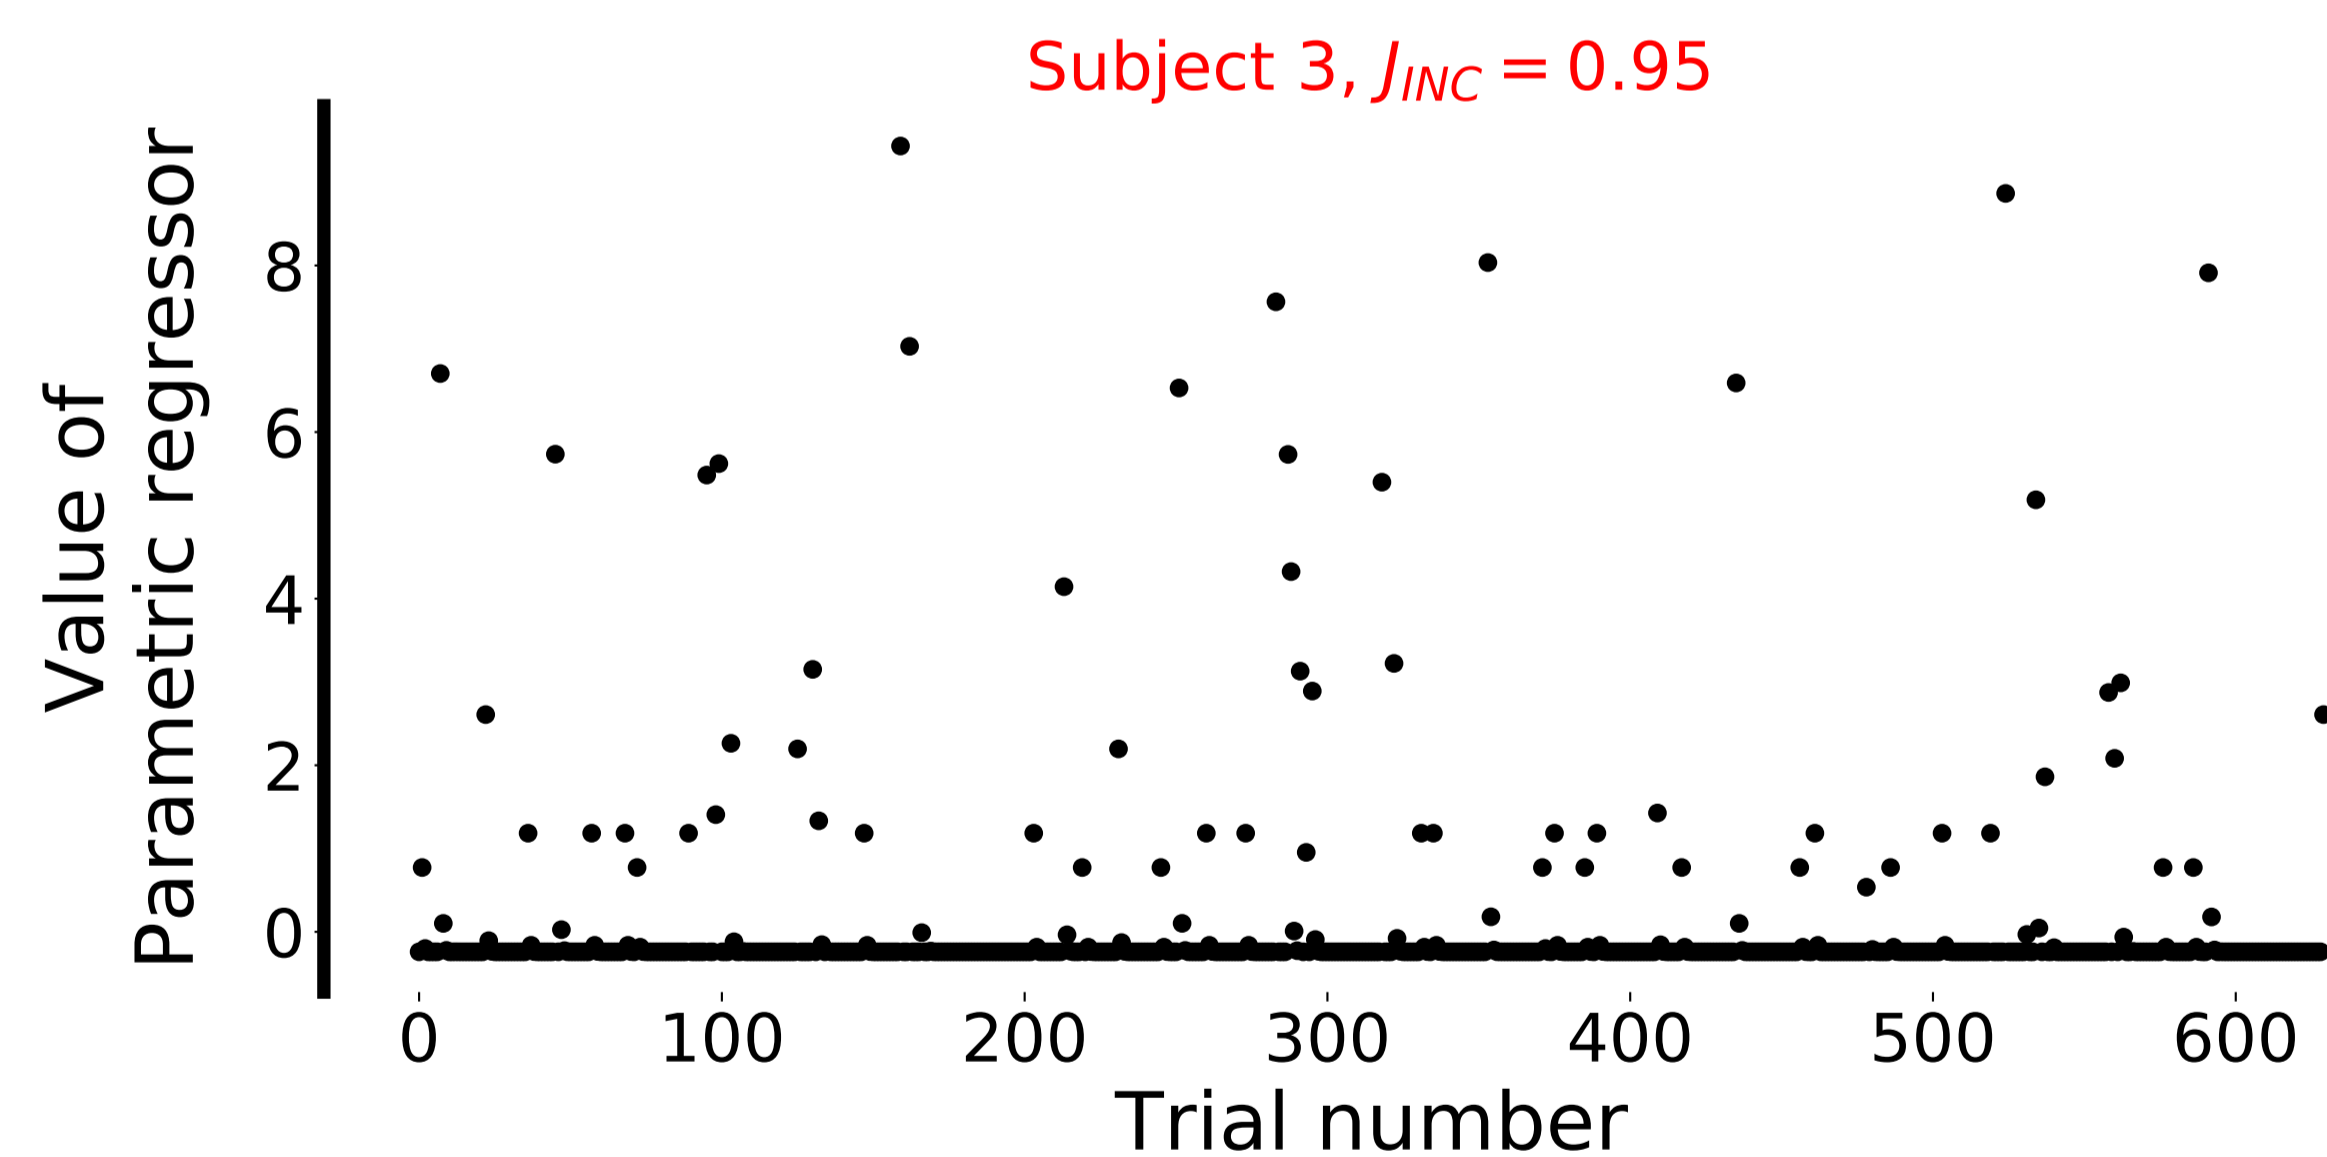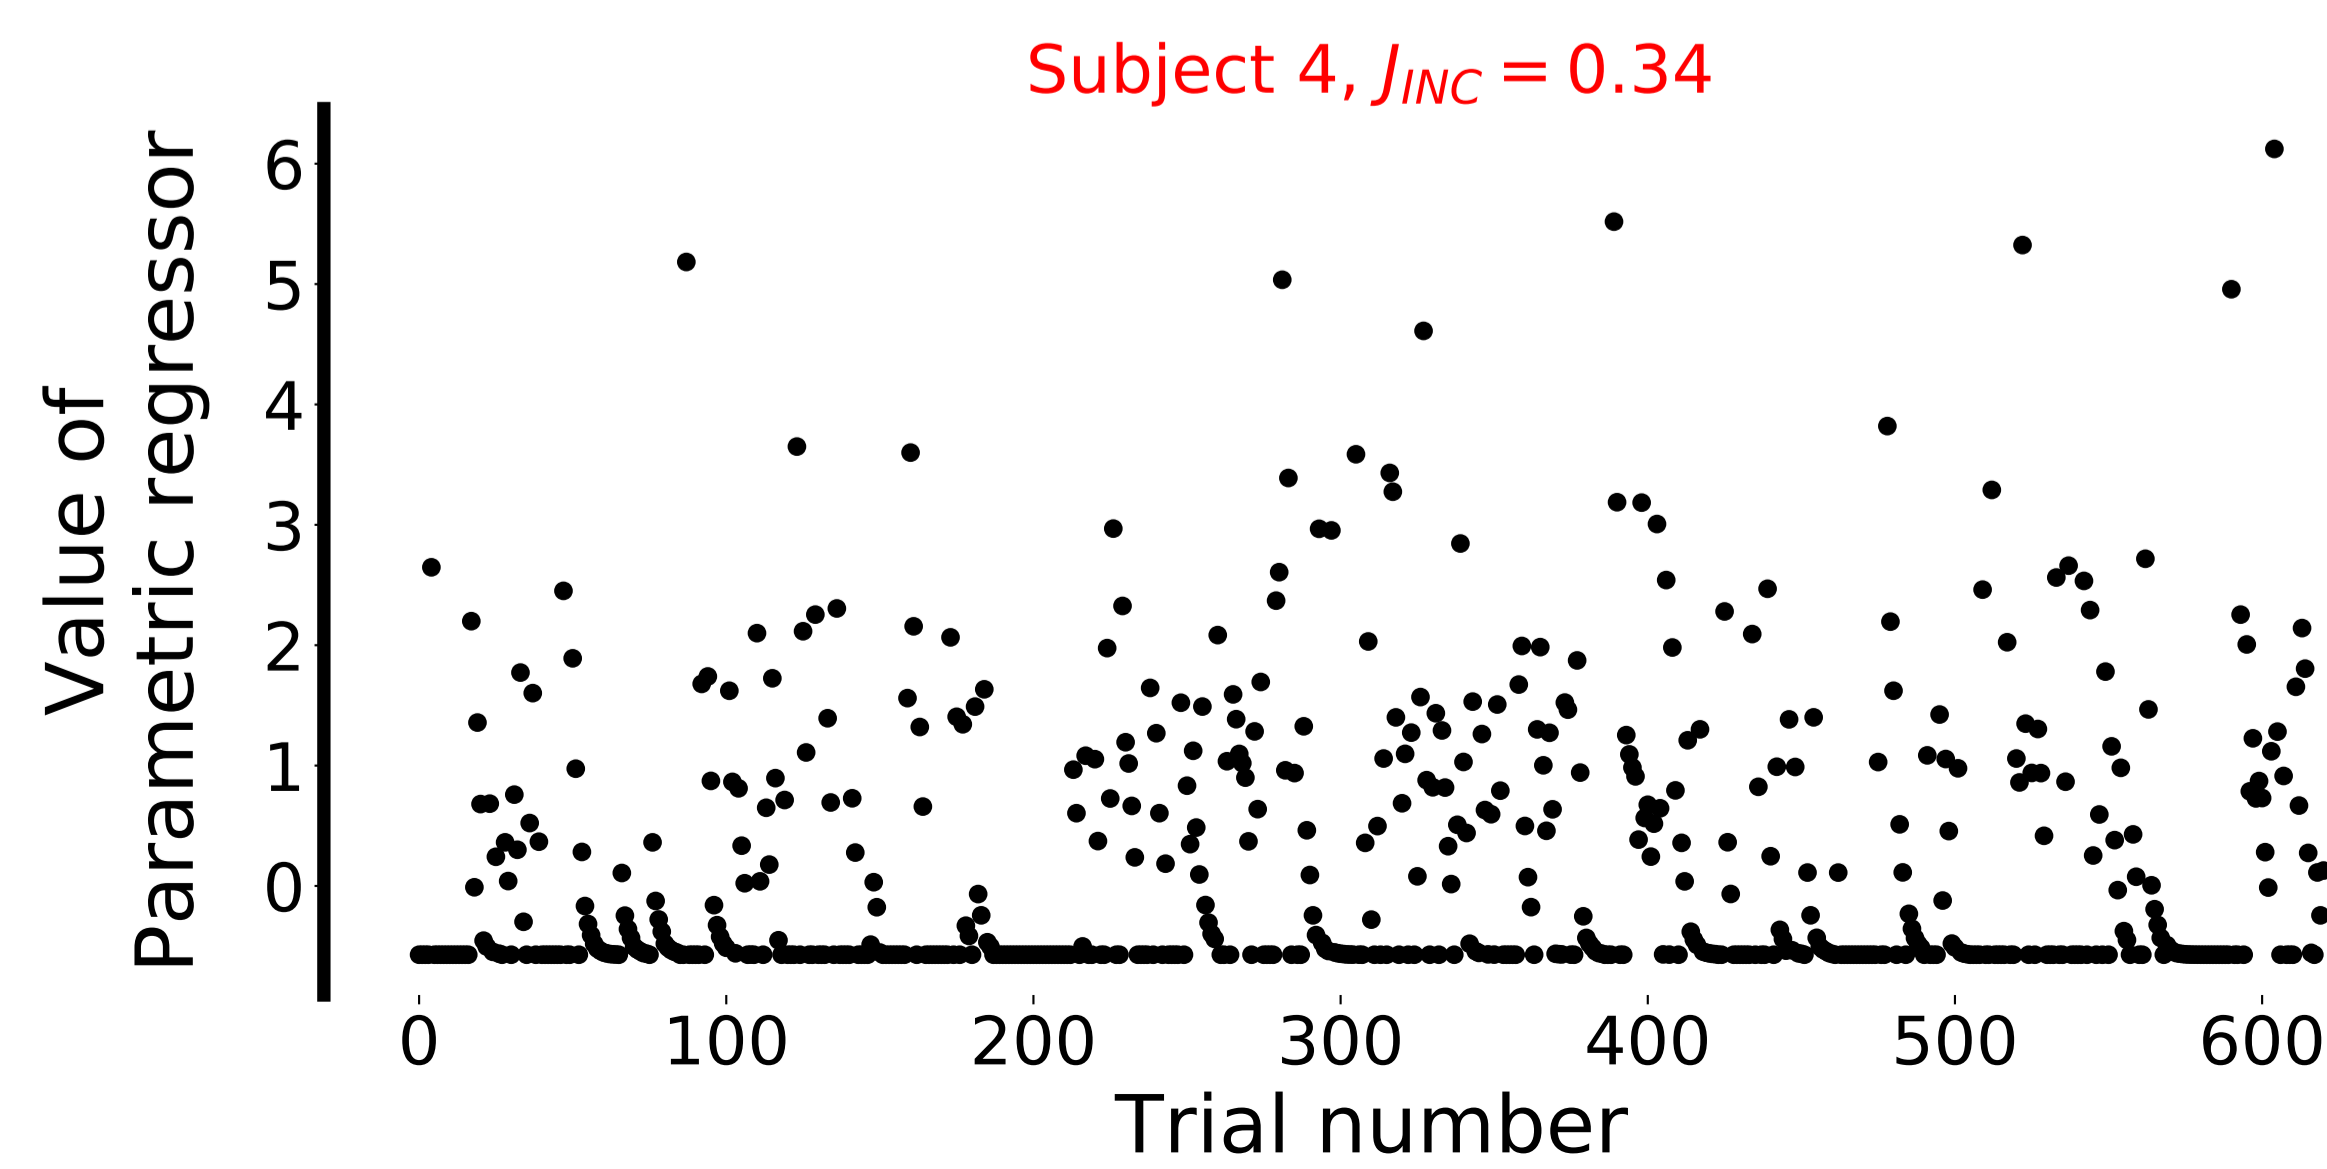

# Open-Ended session

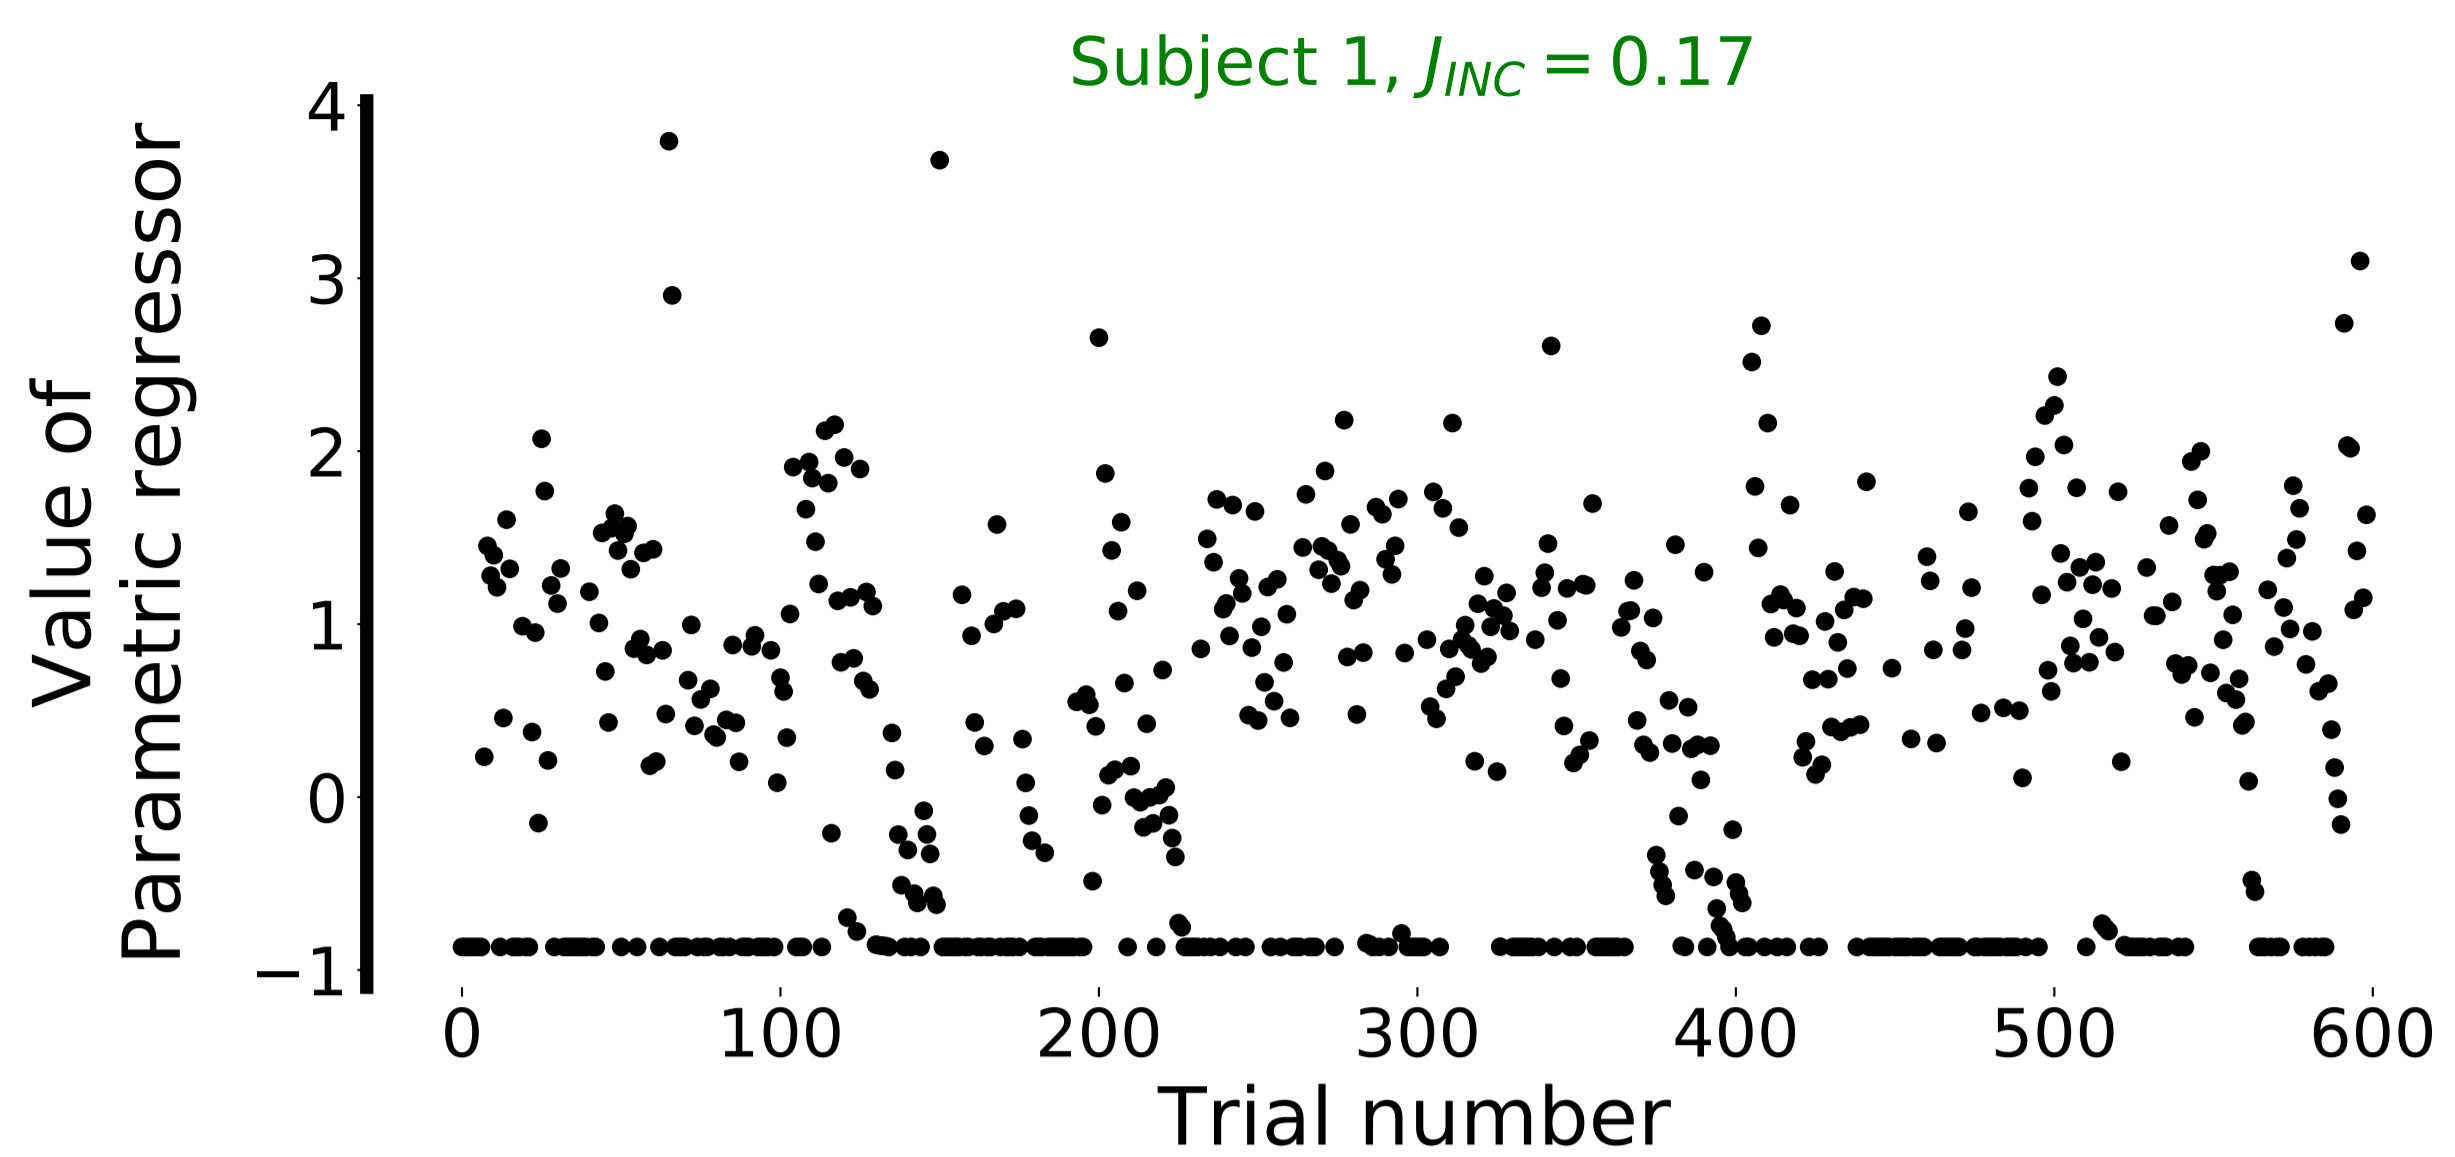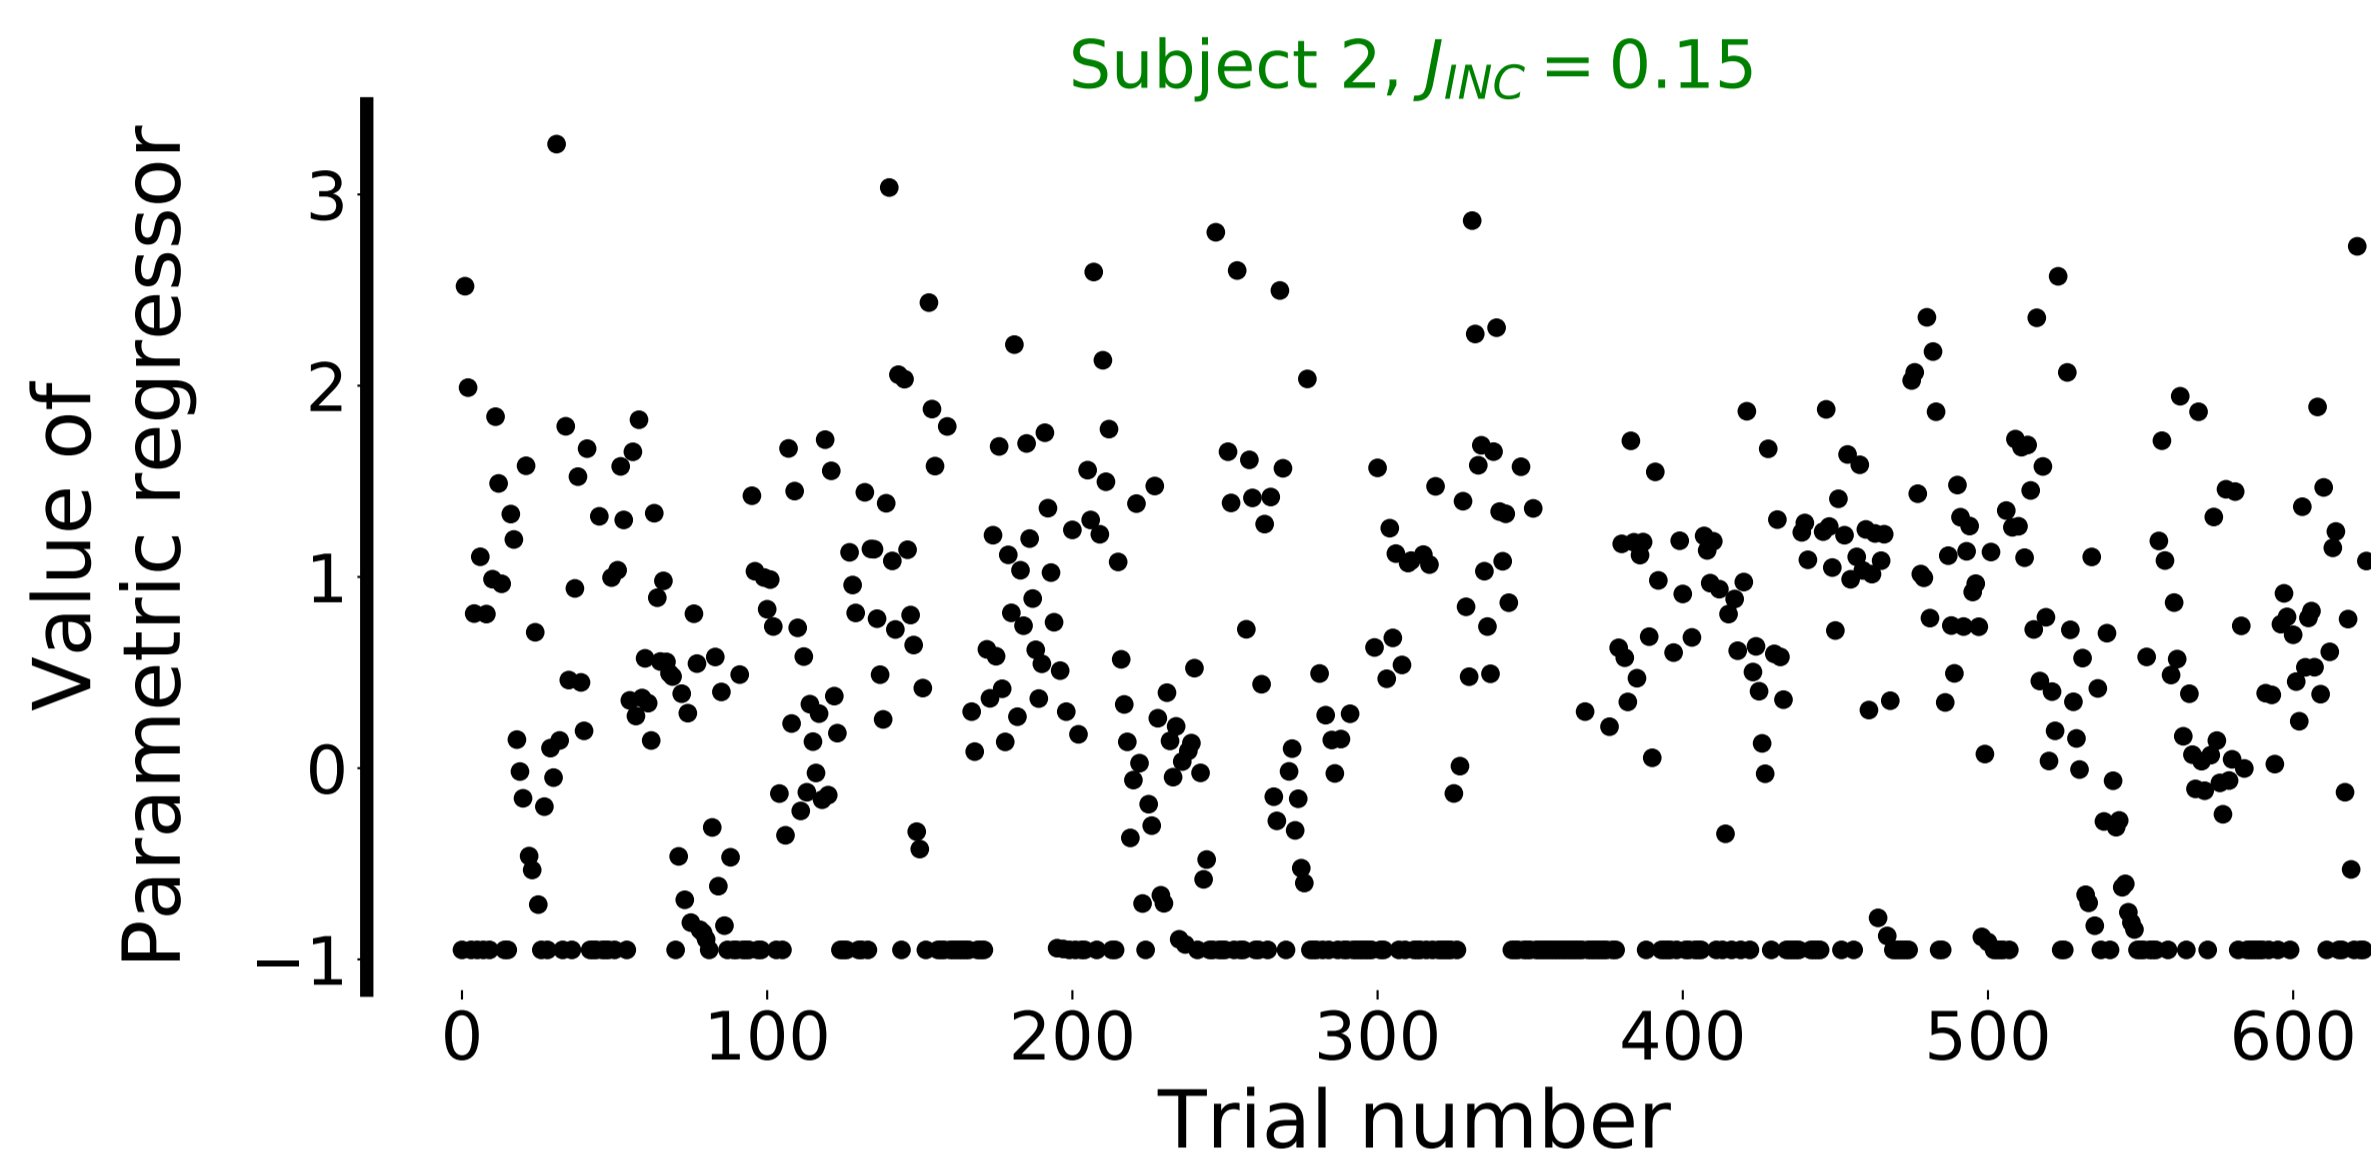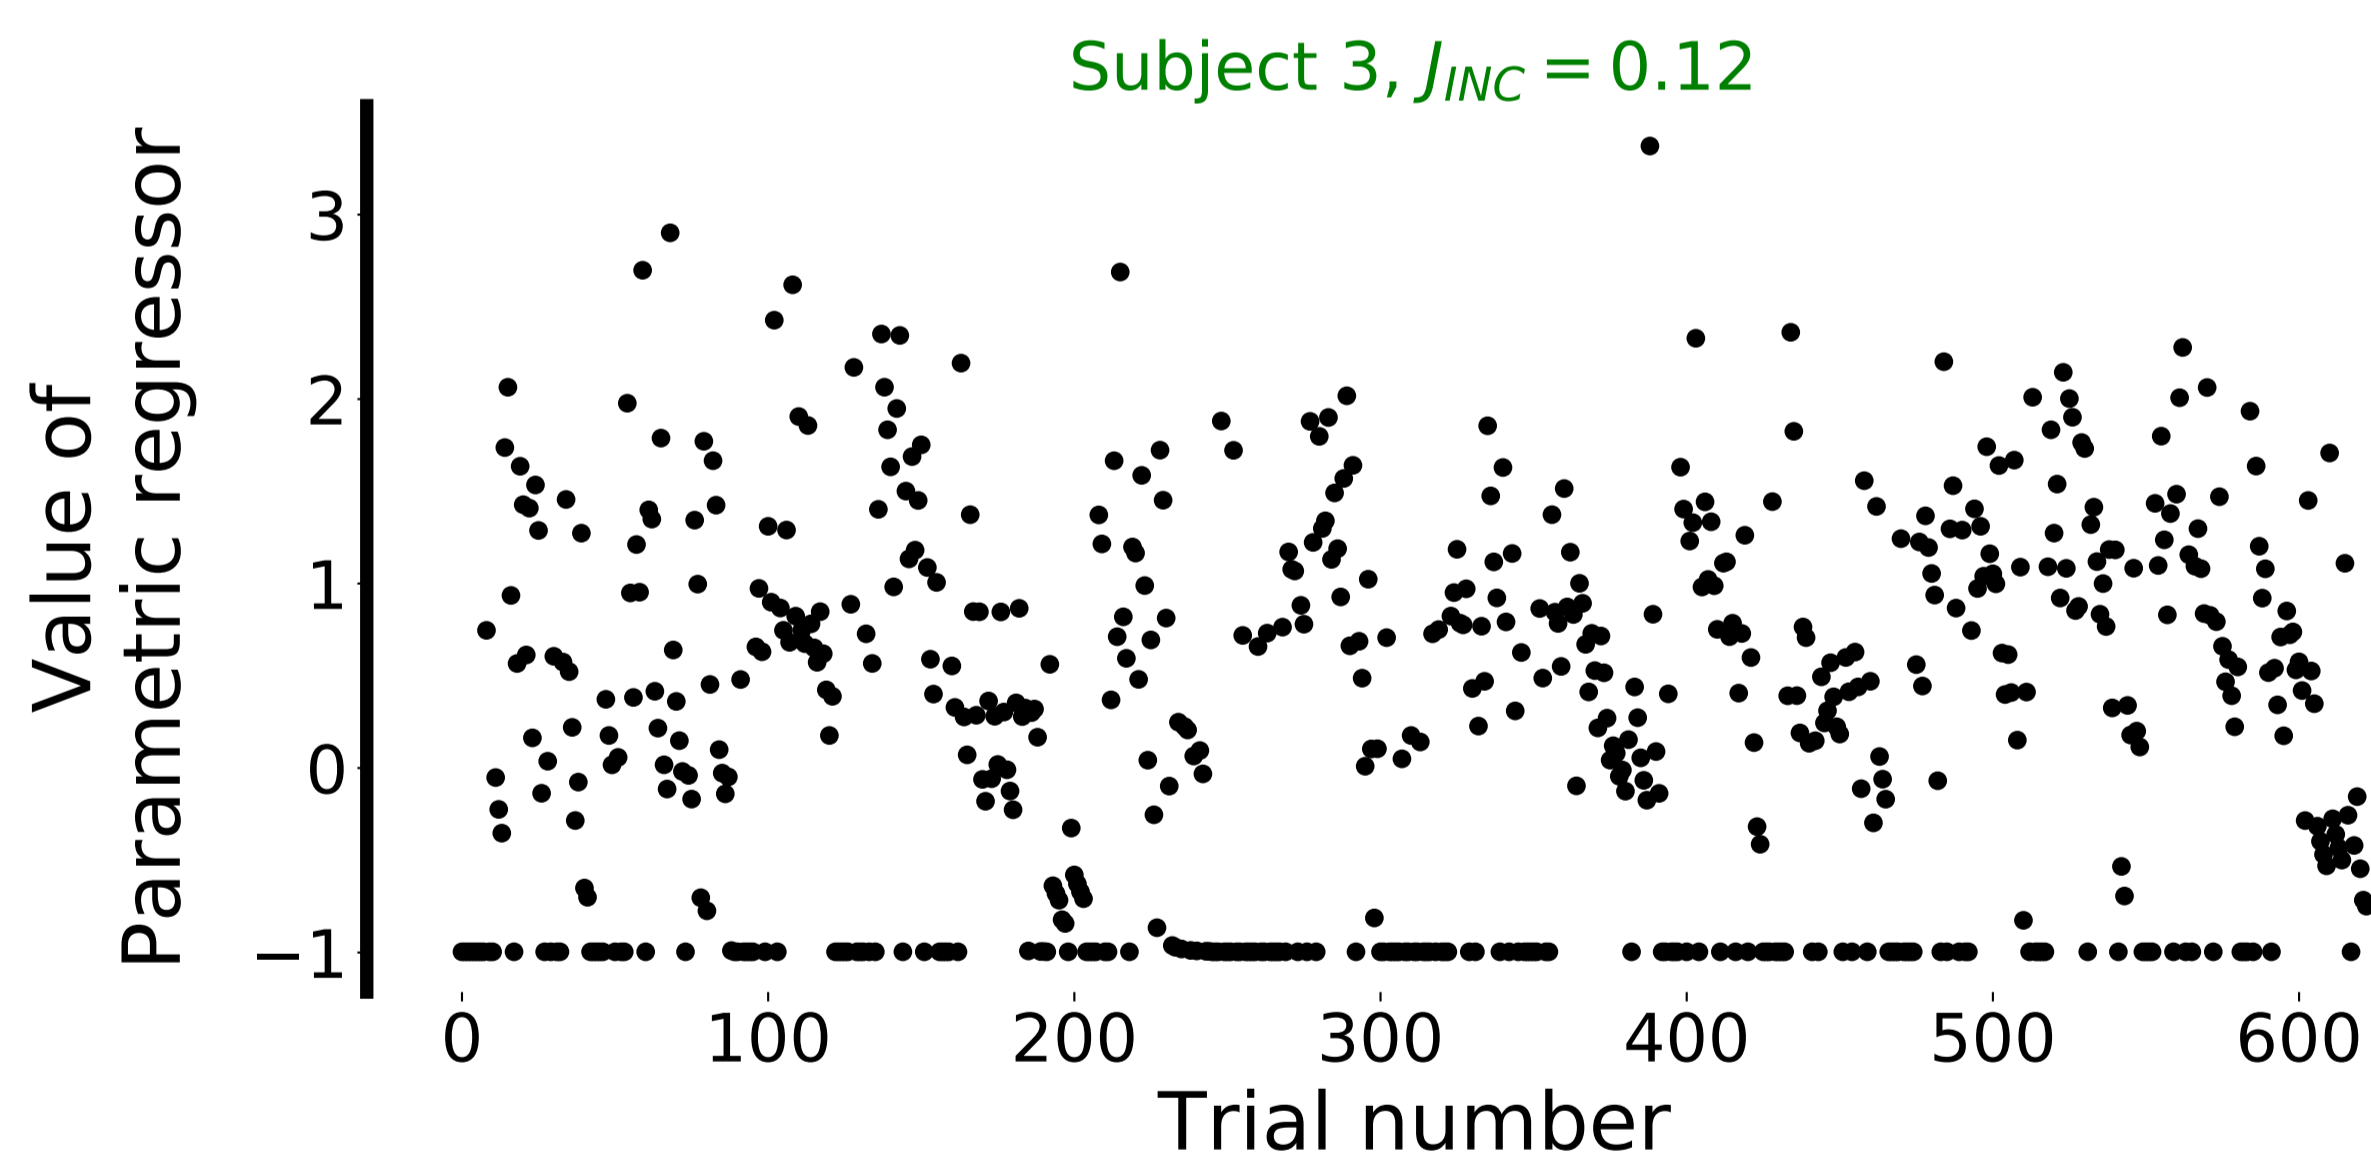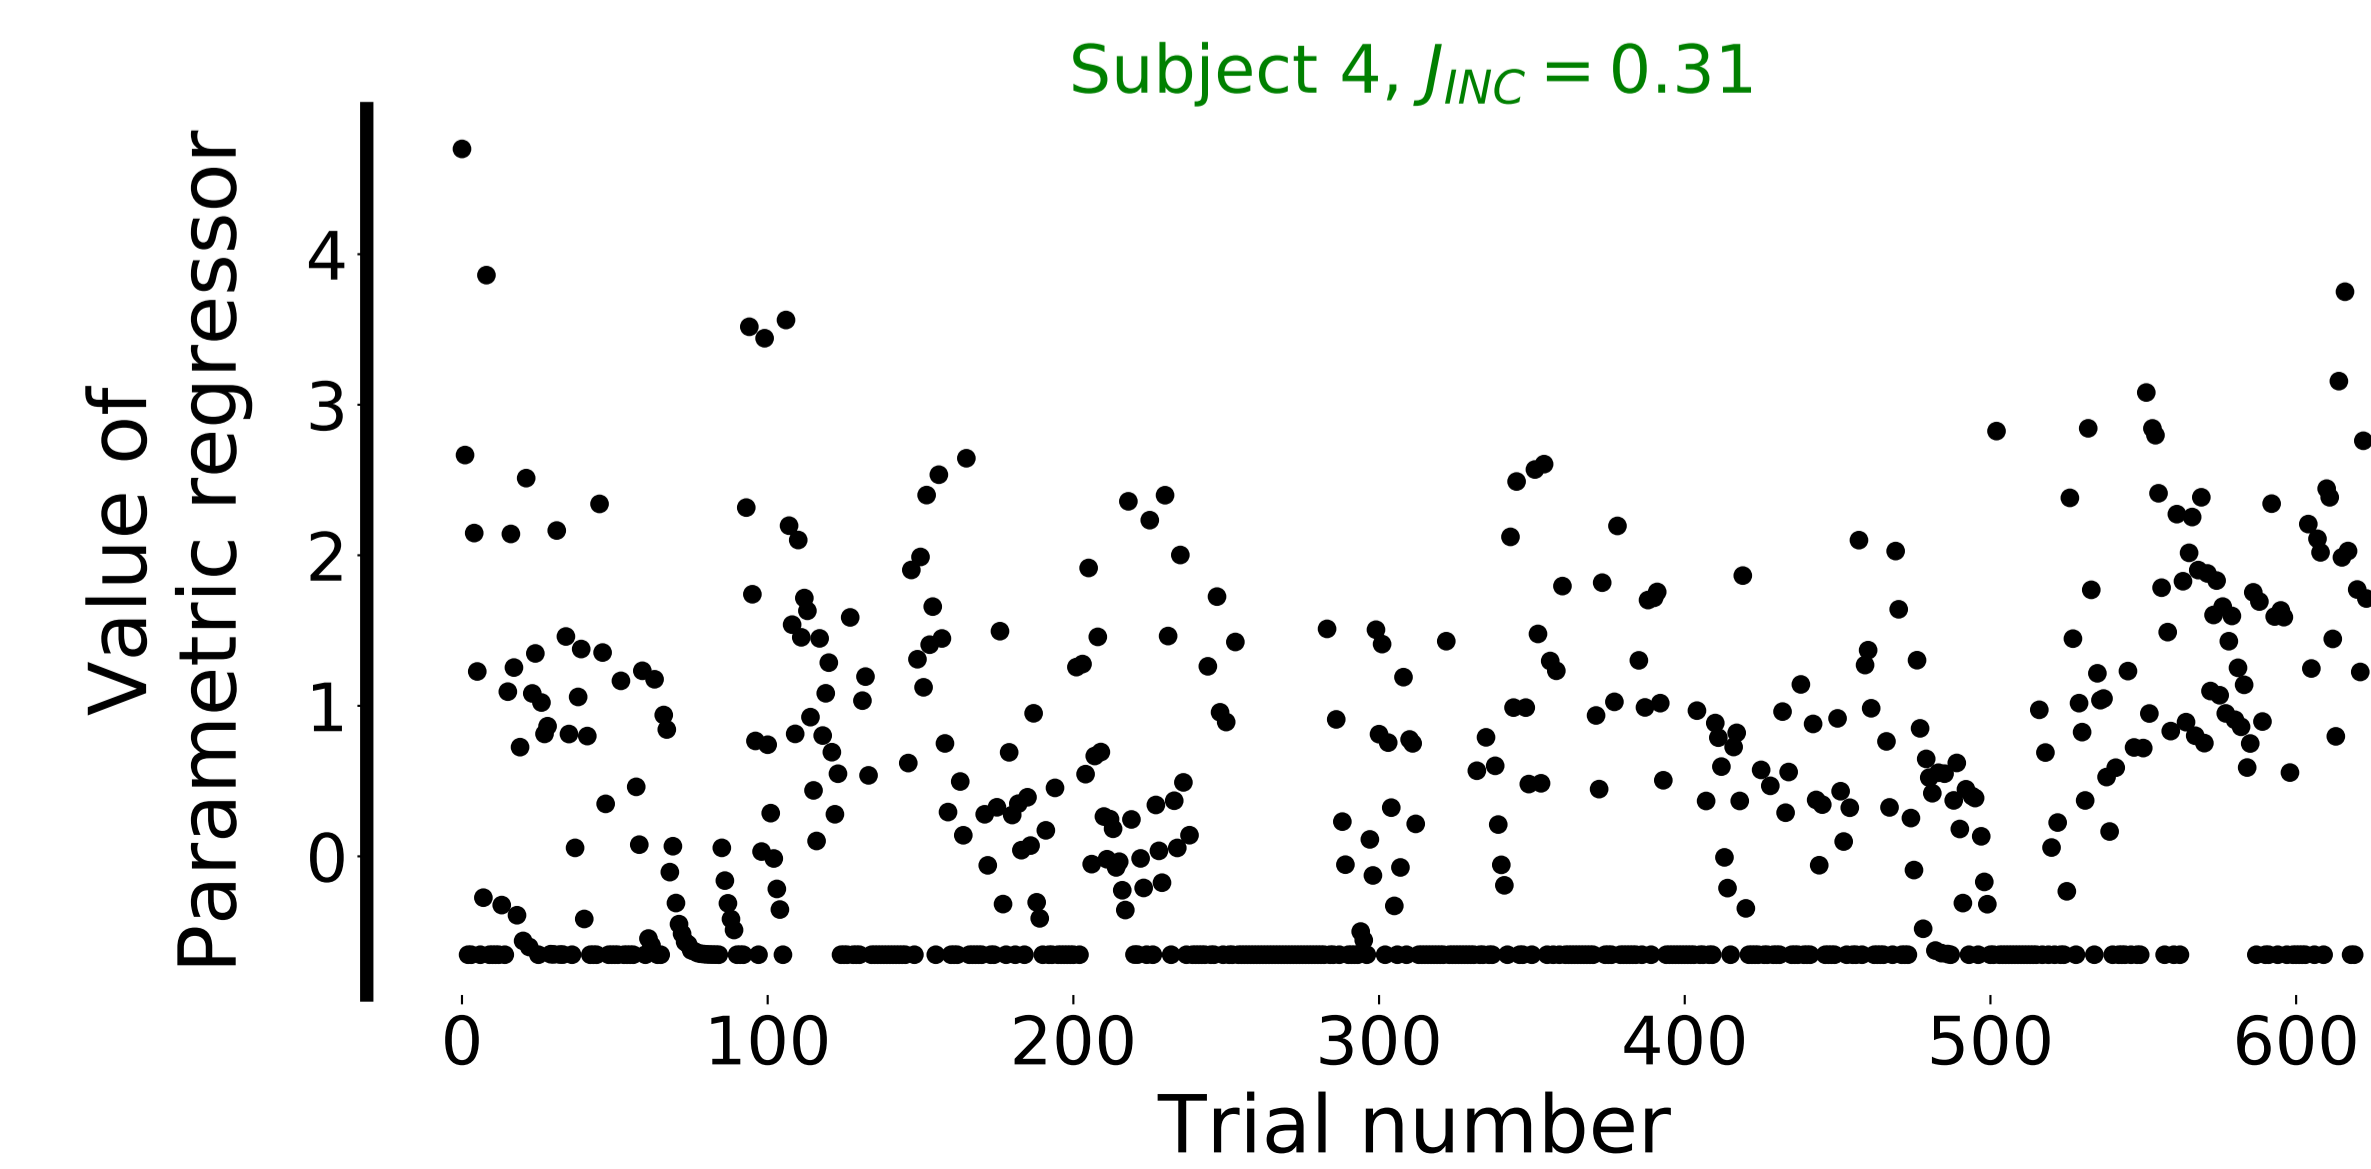

Supplement: supp [file elife-50469-supp-v1.zip › elife_poa_e50469_Figure_8_figure_supplement_2.pdf]

**a**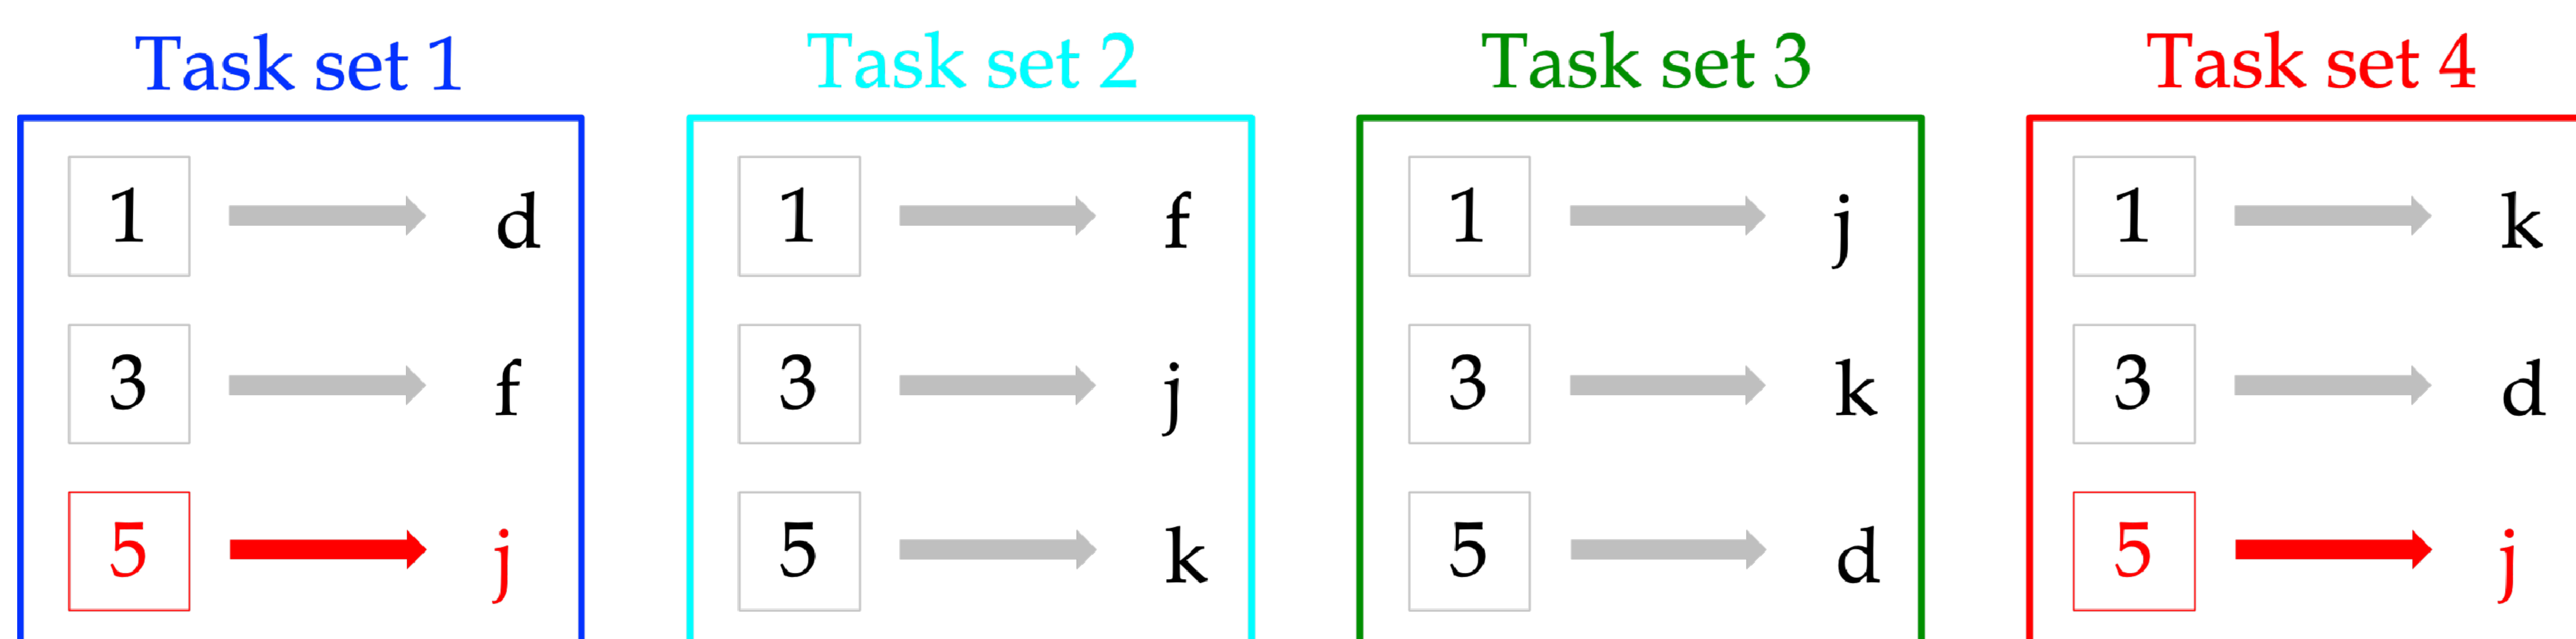**b**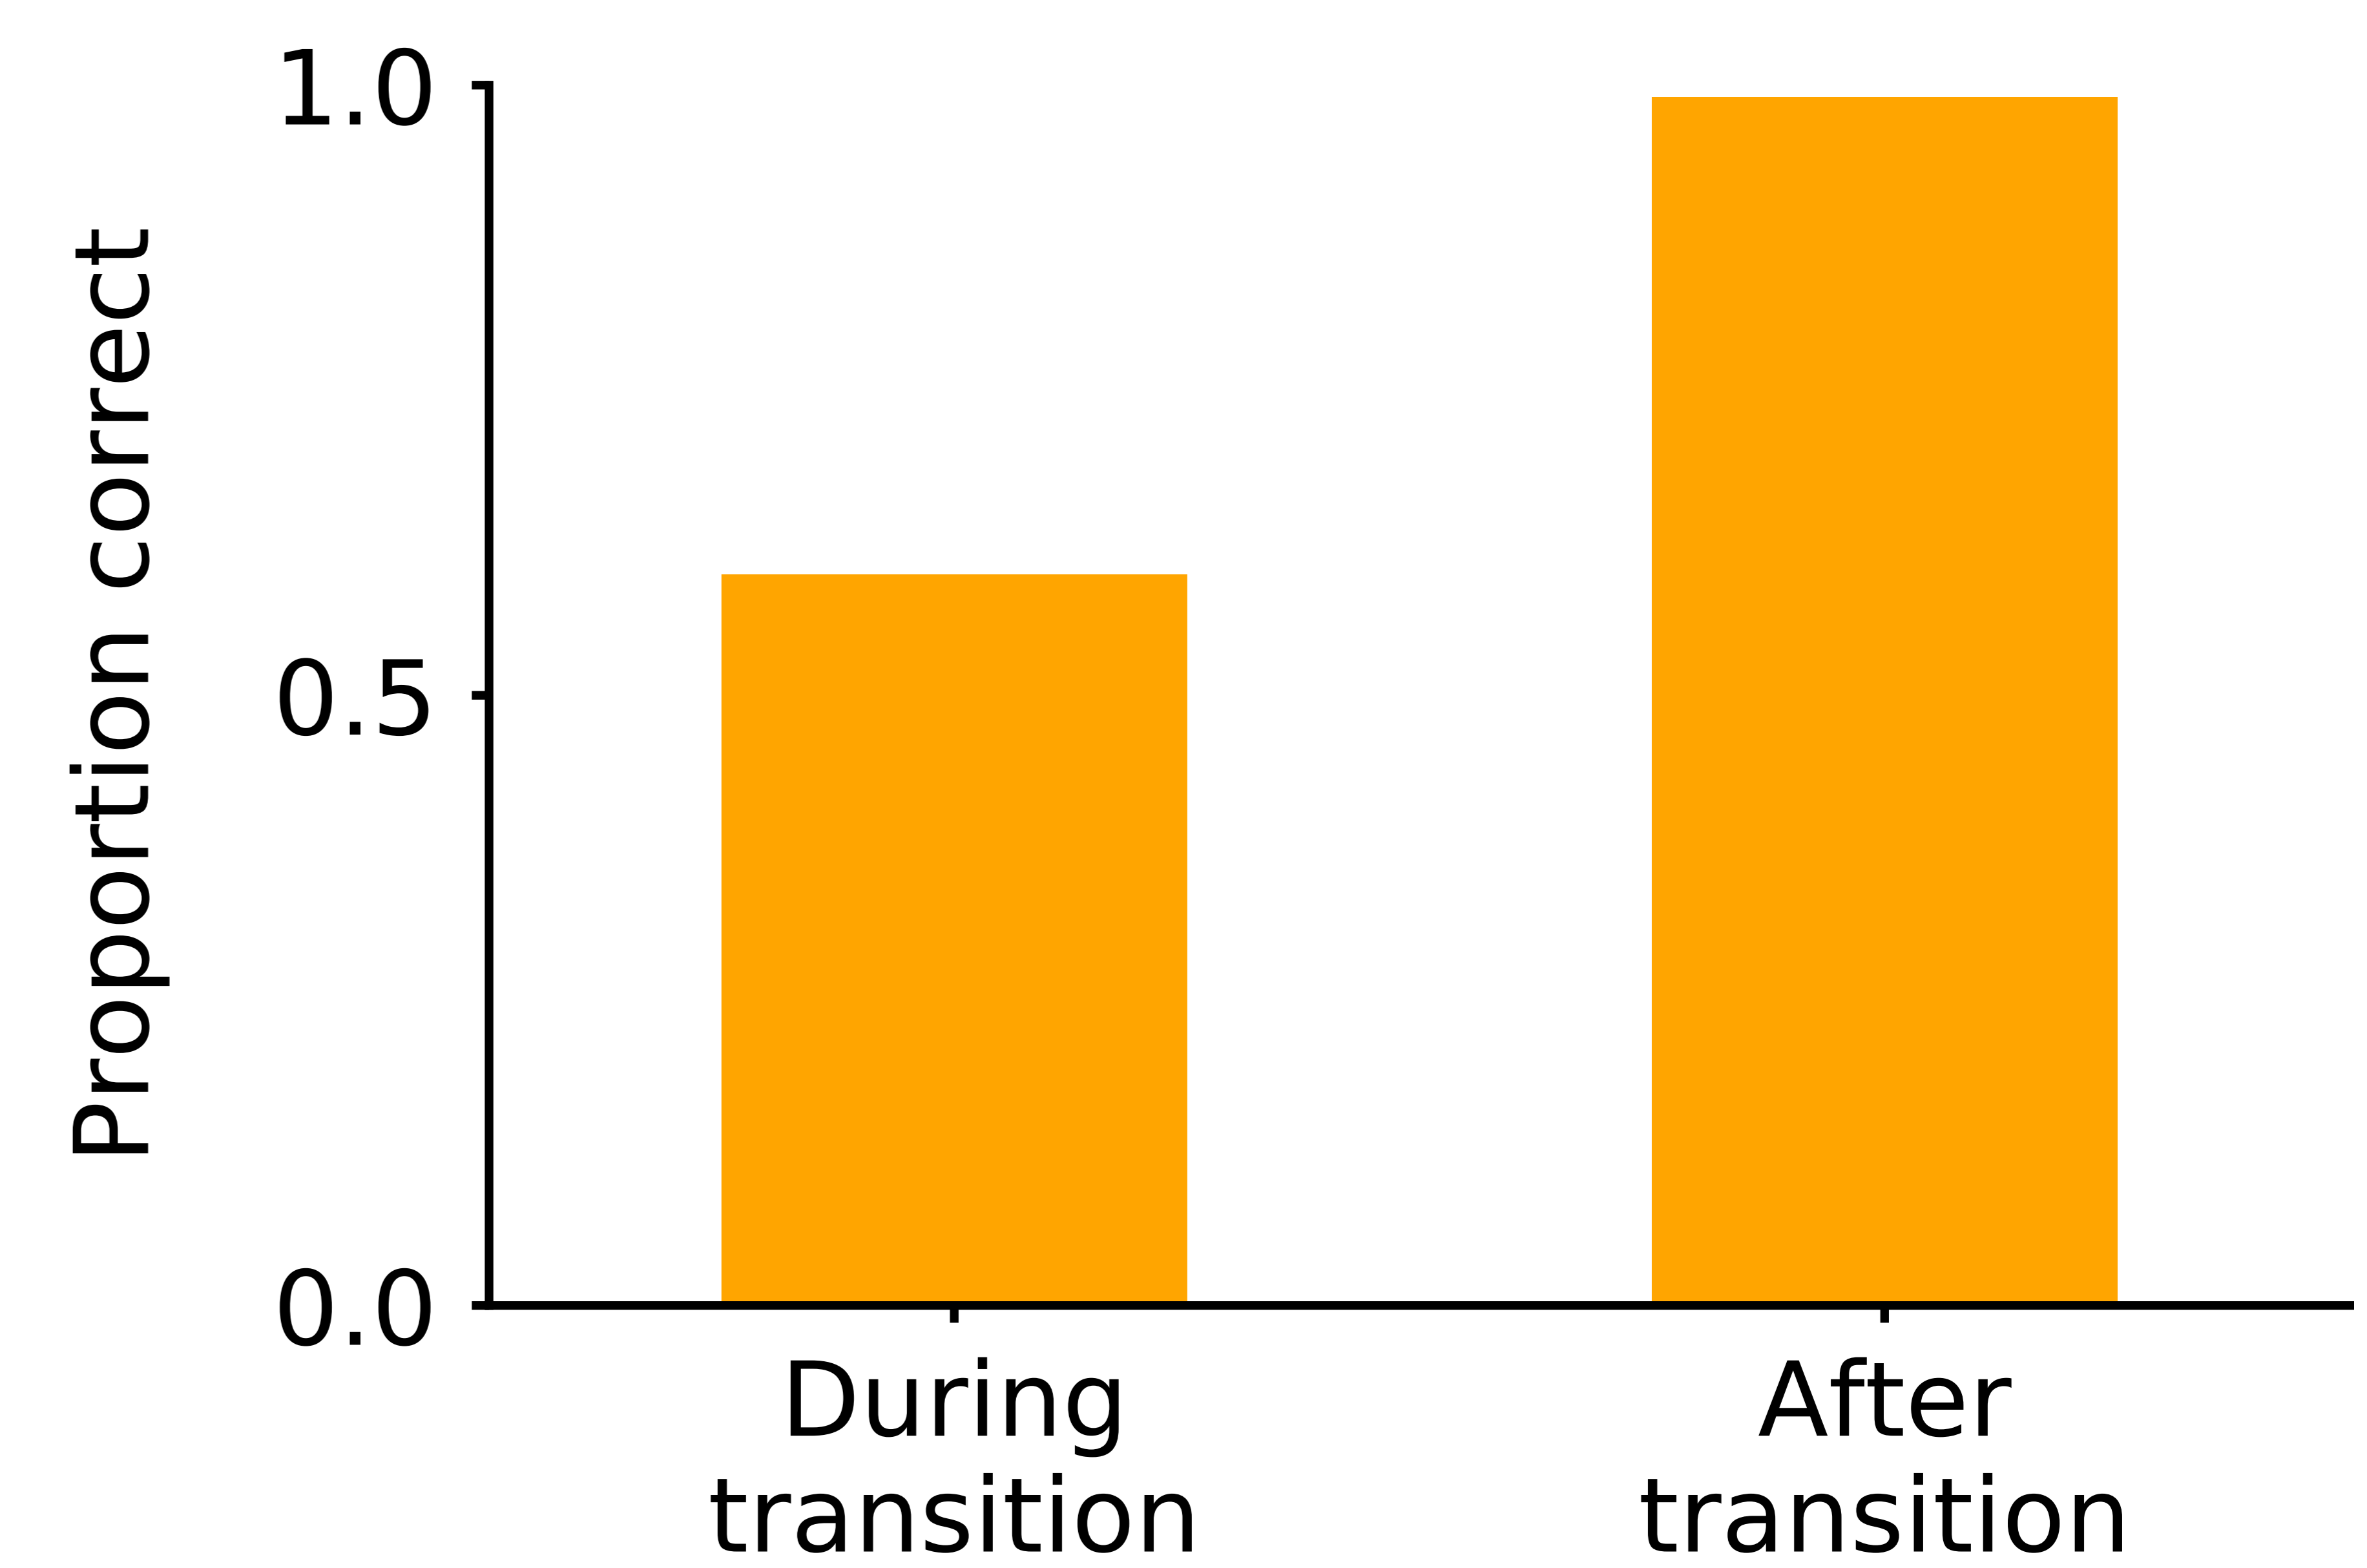**c**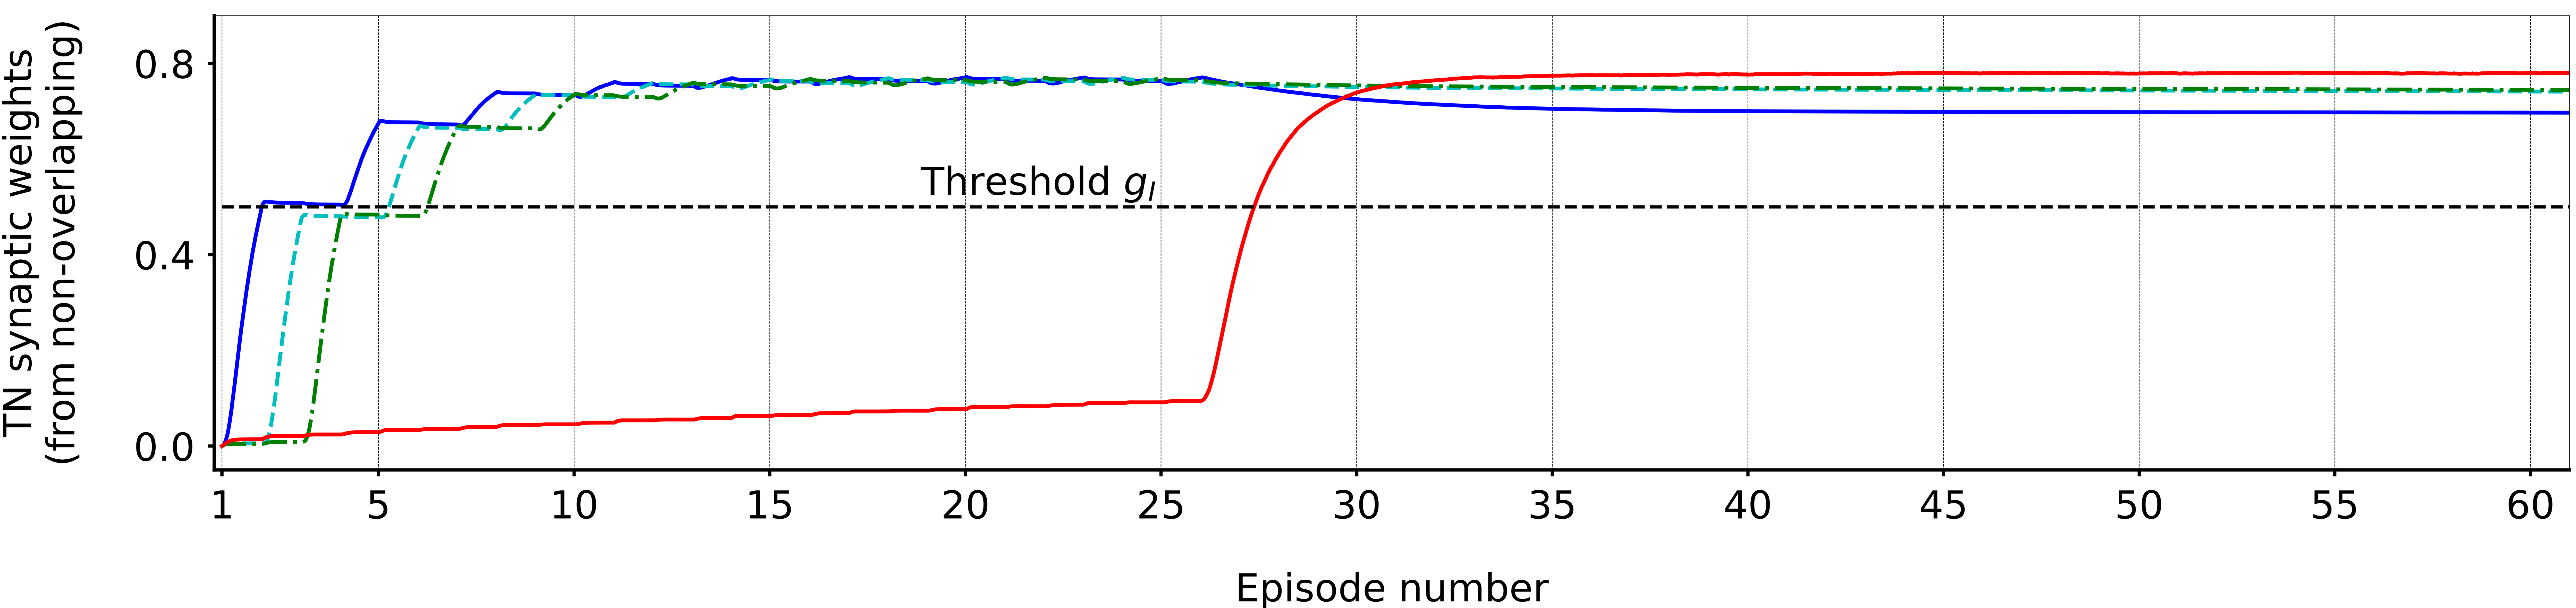**d**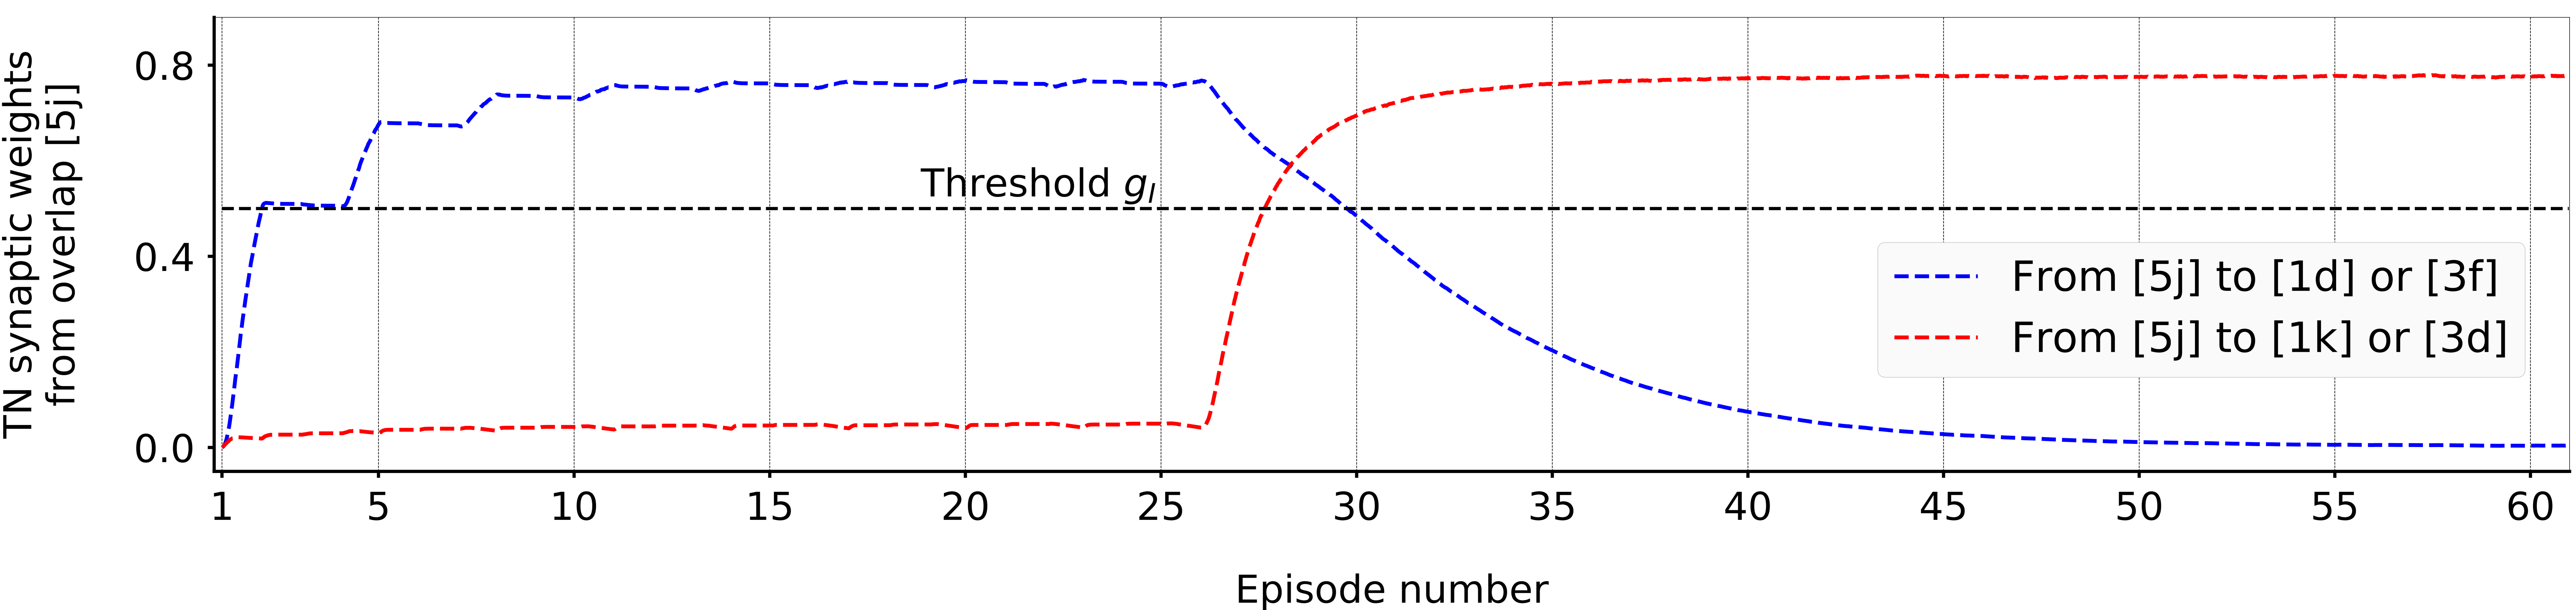**e**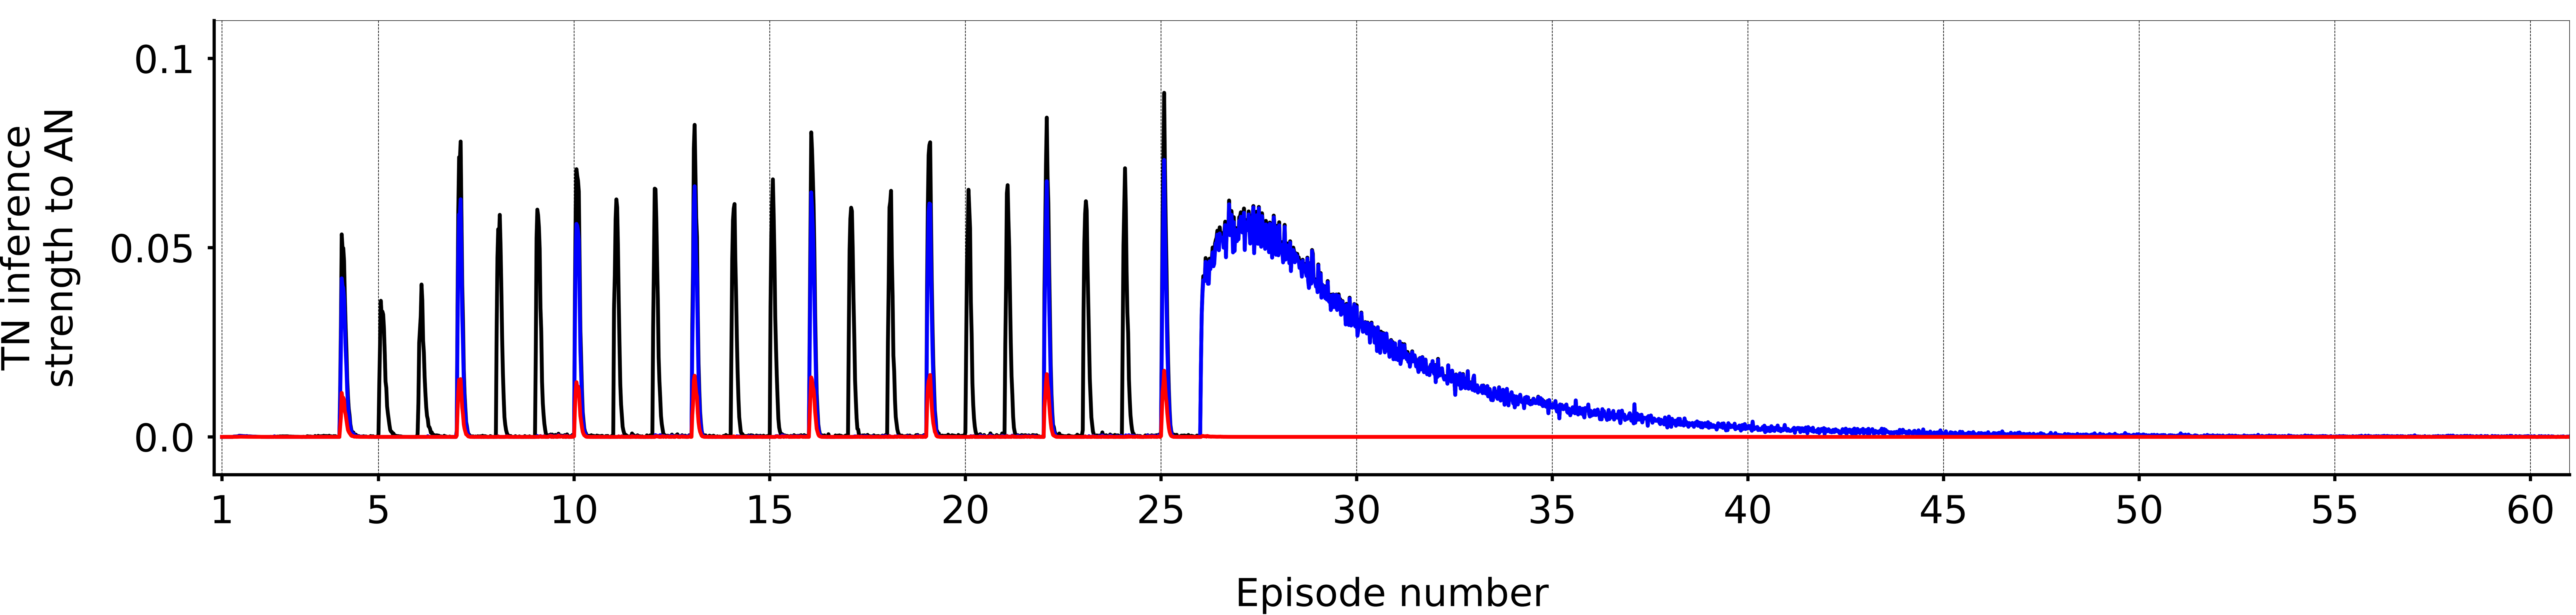**f**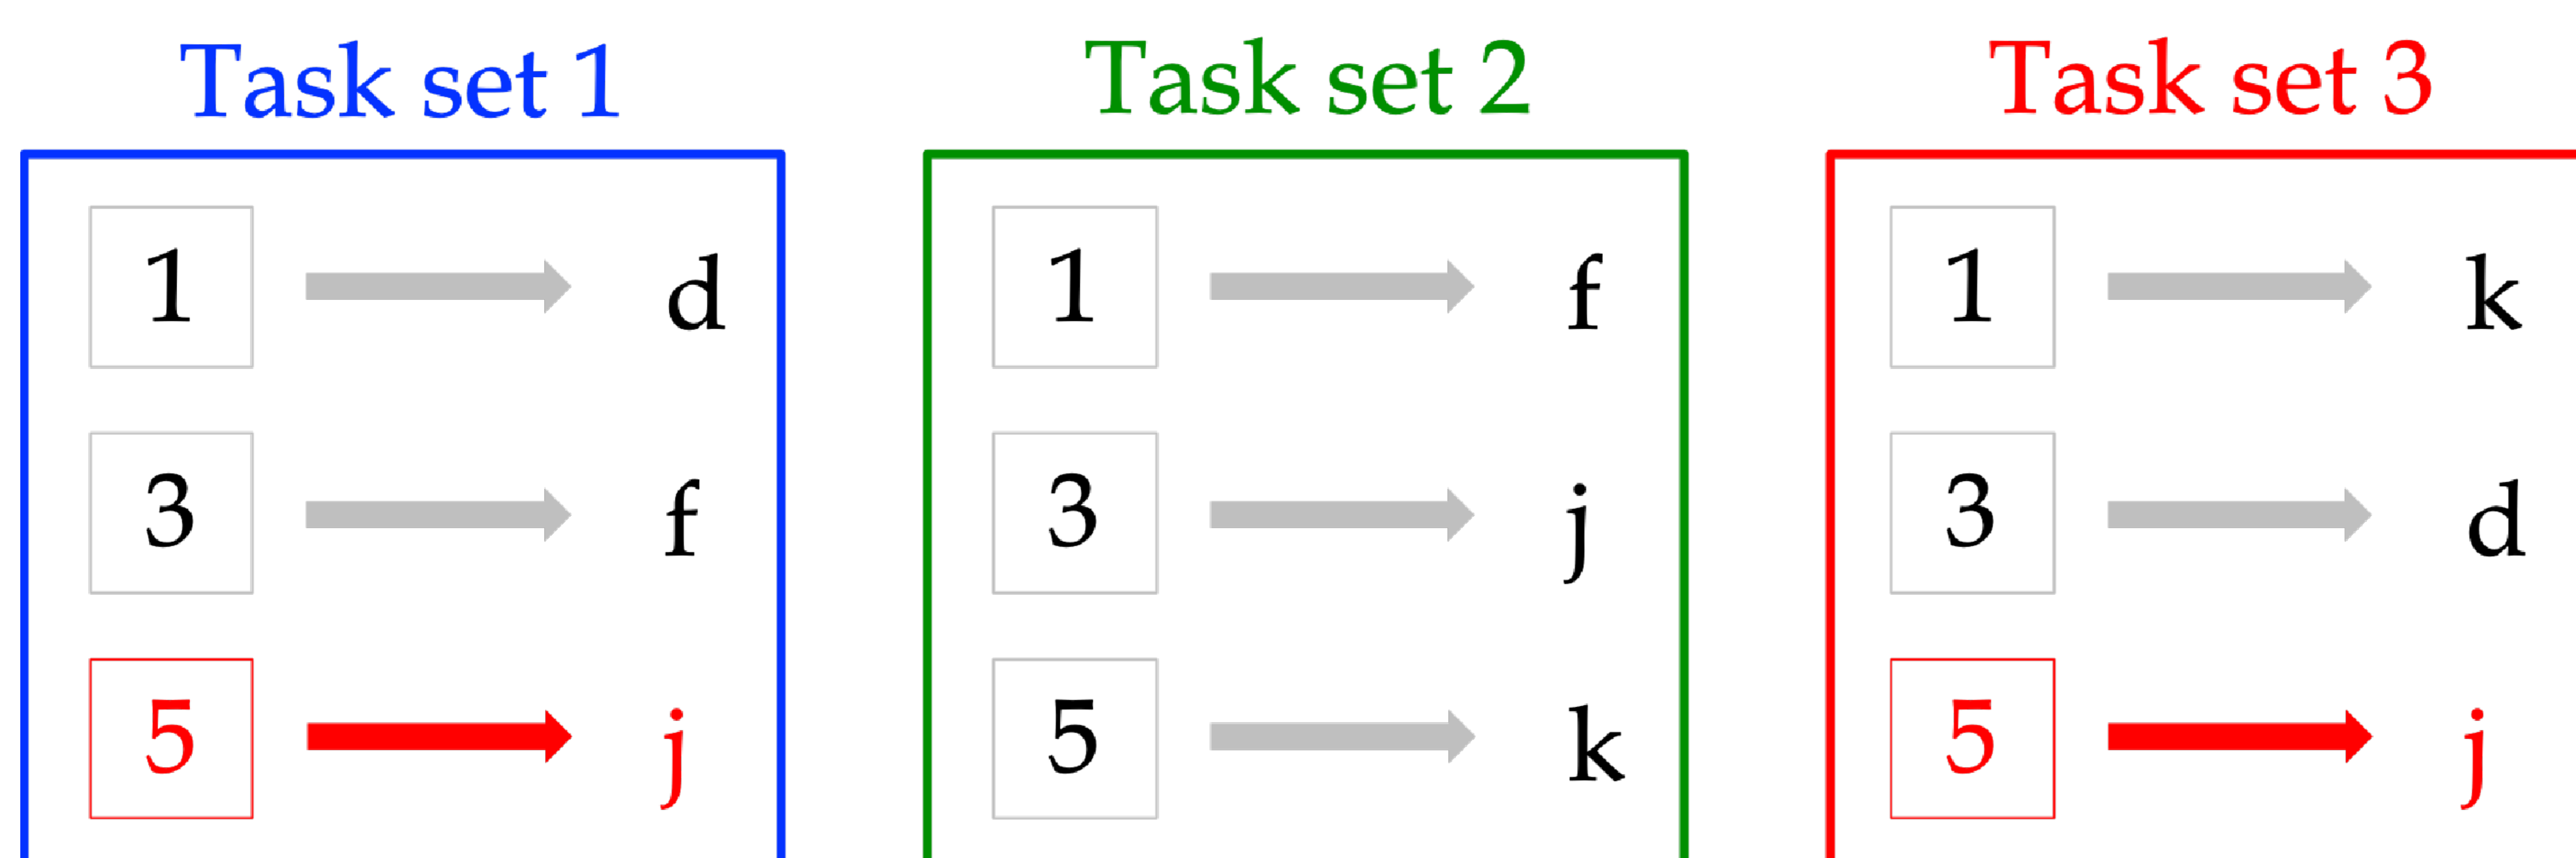**g**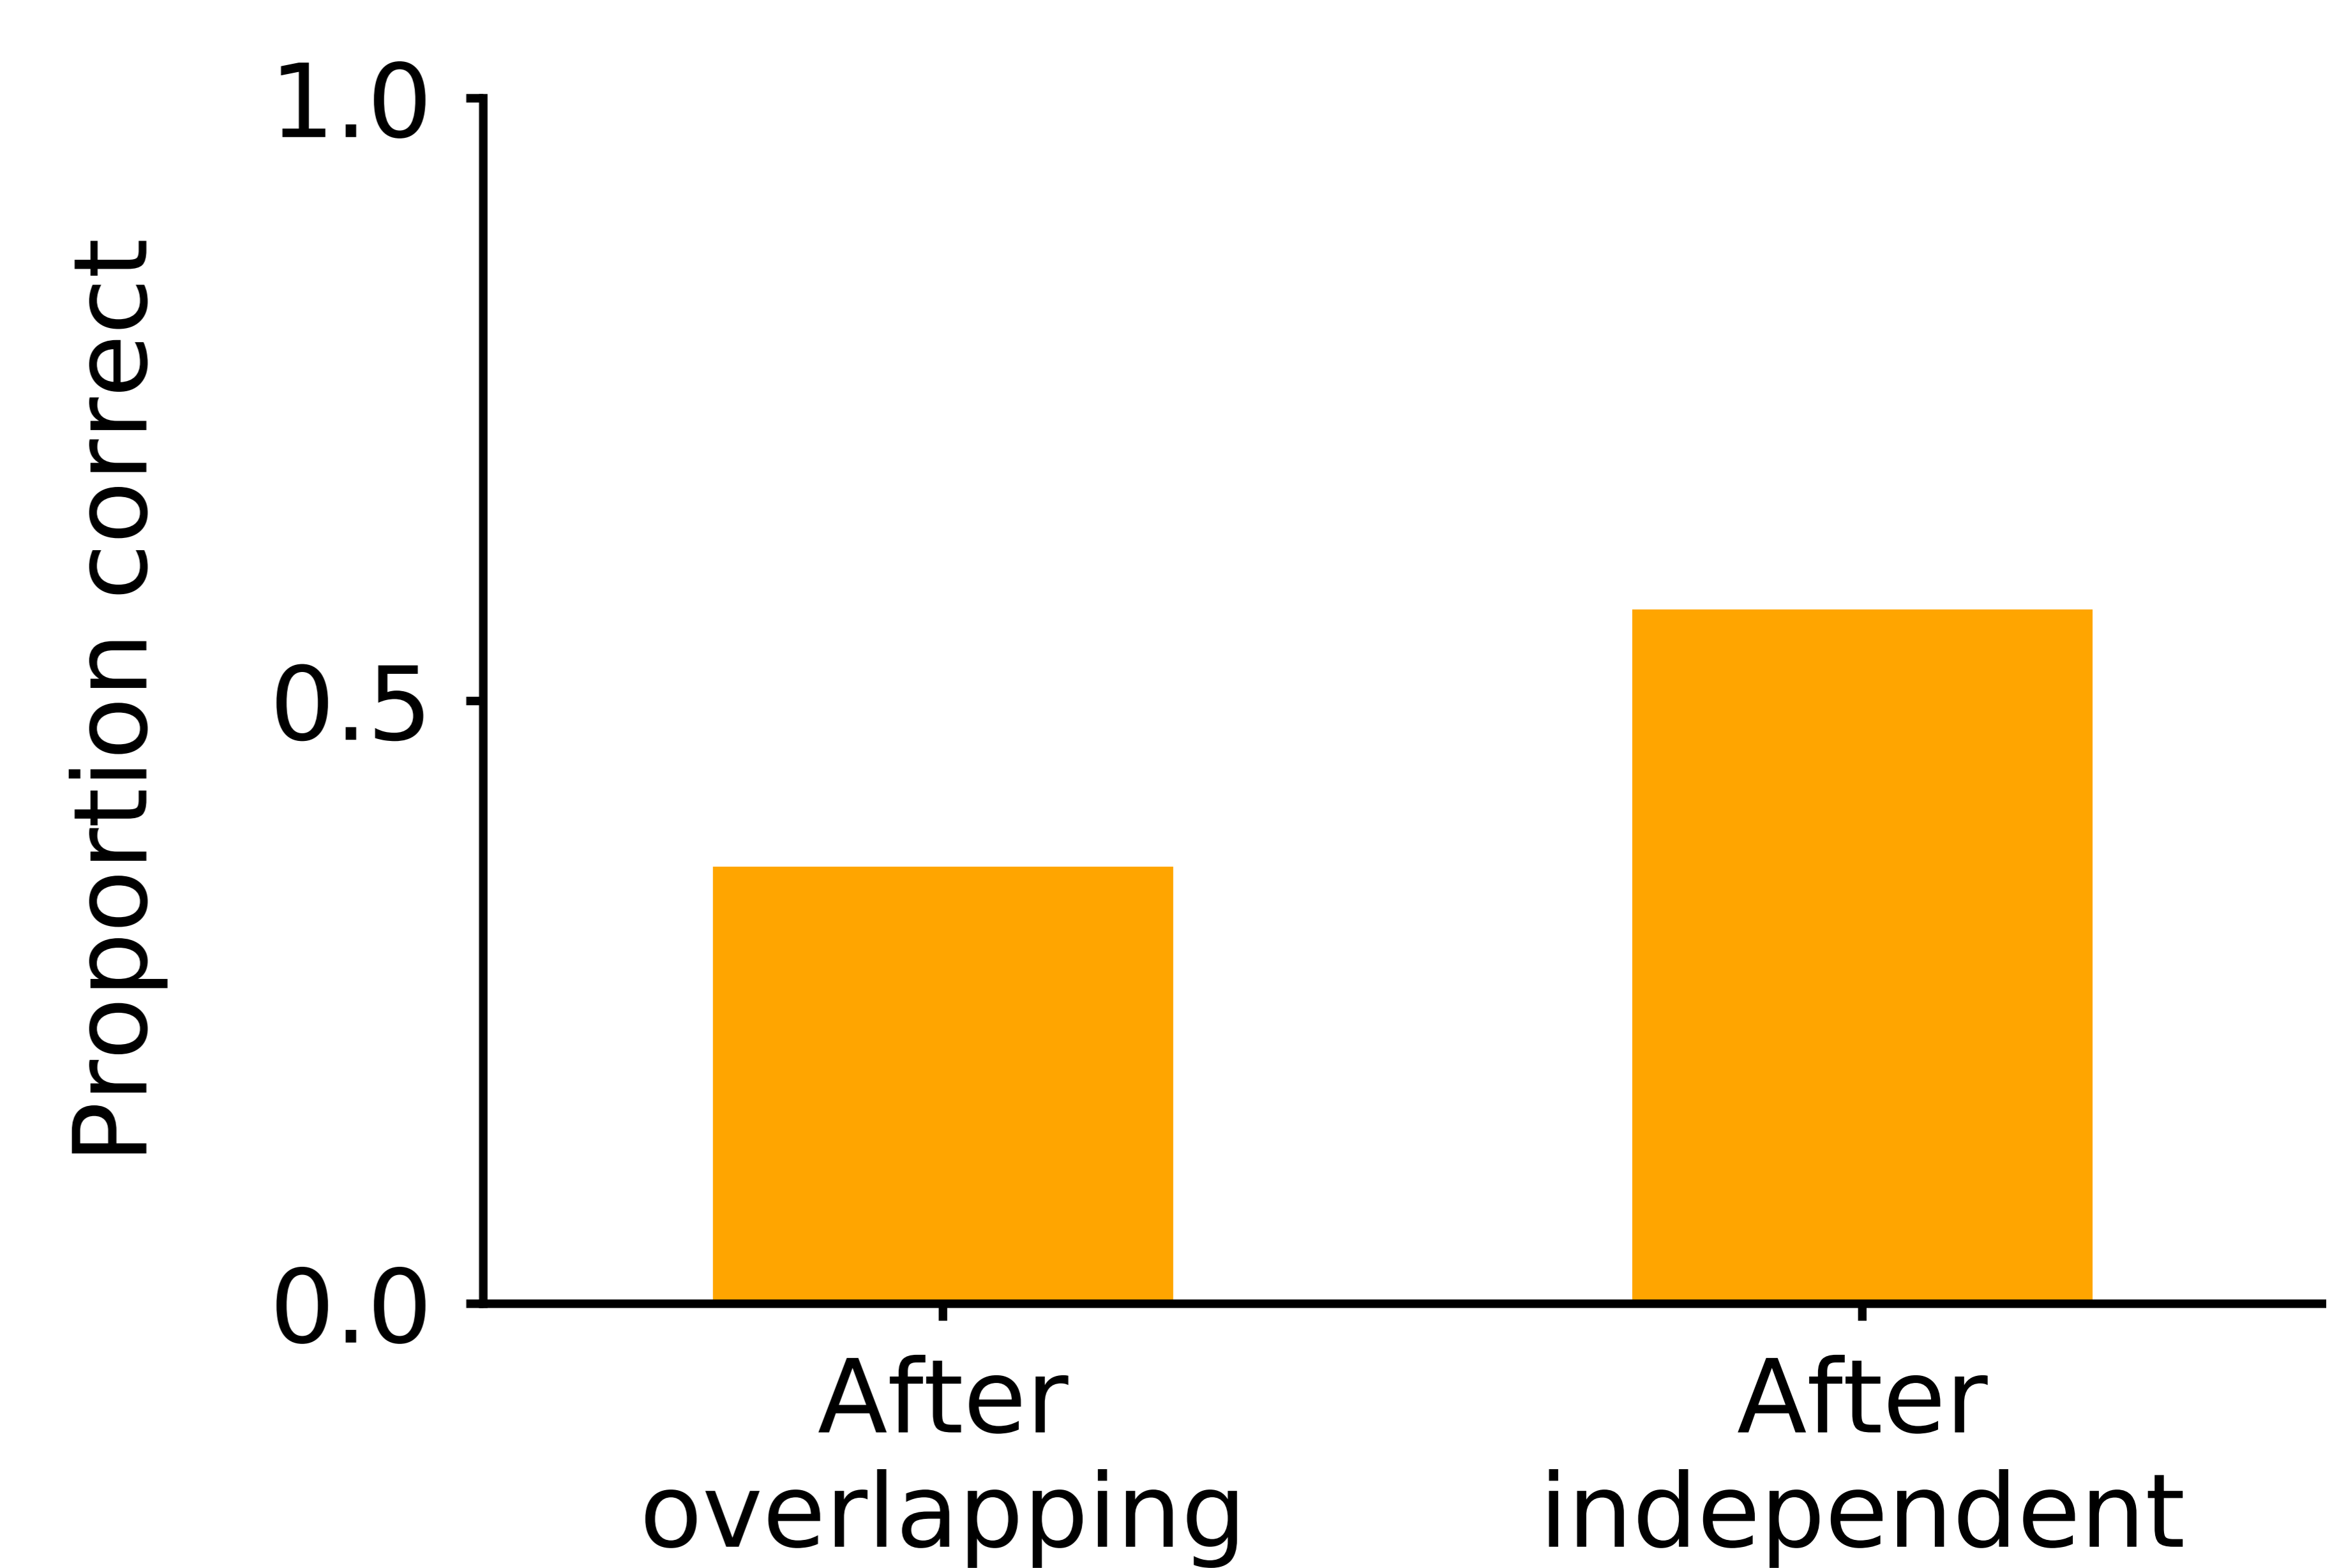

Supplement: supp [file elife-50469-supp-v1.zip › elife_poa_e50469_Figure_3_figure_supplement_2.pdf]

**a**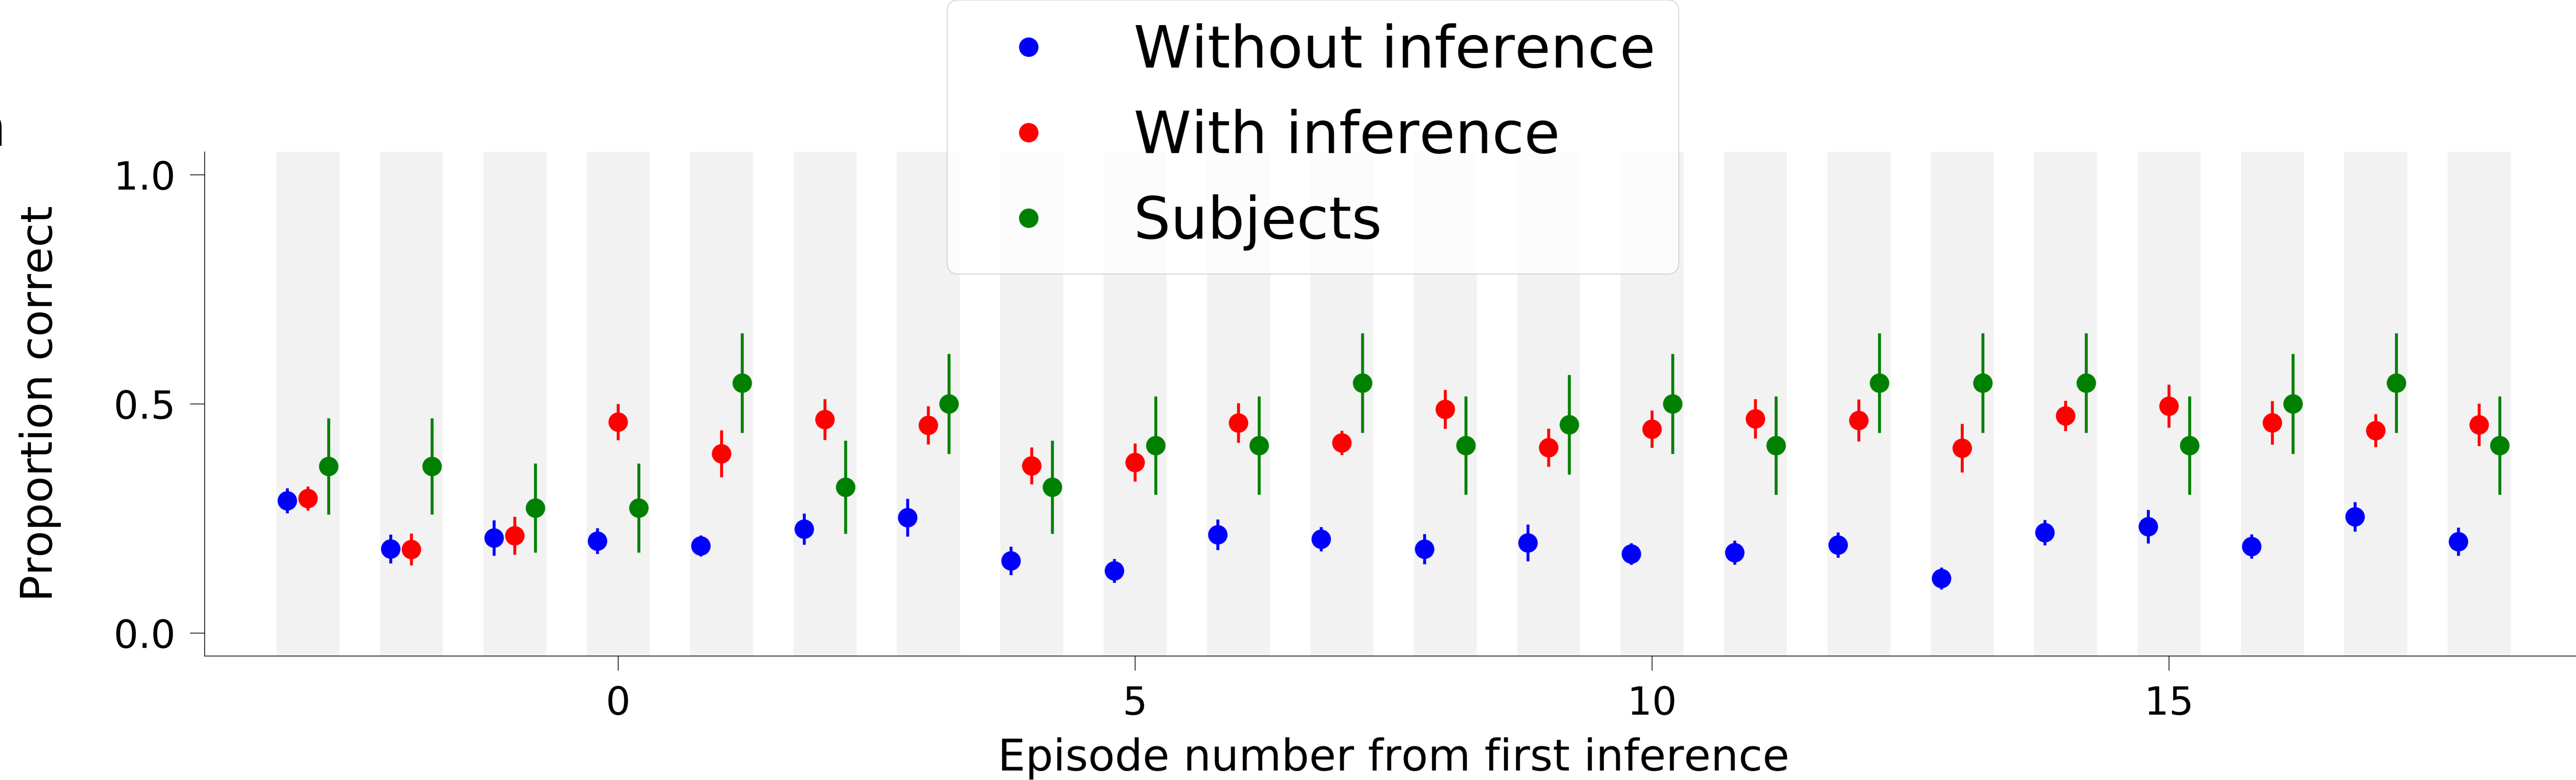**b**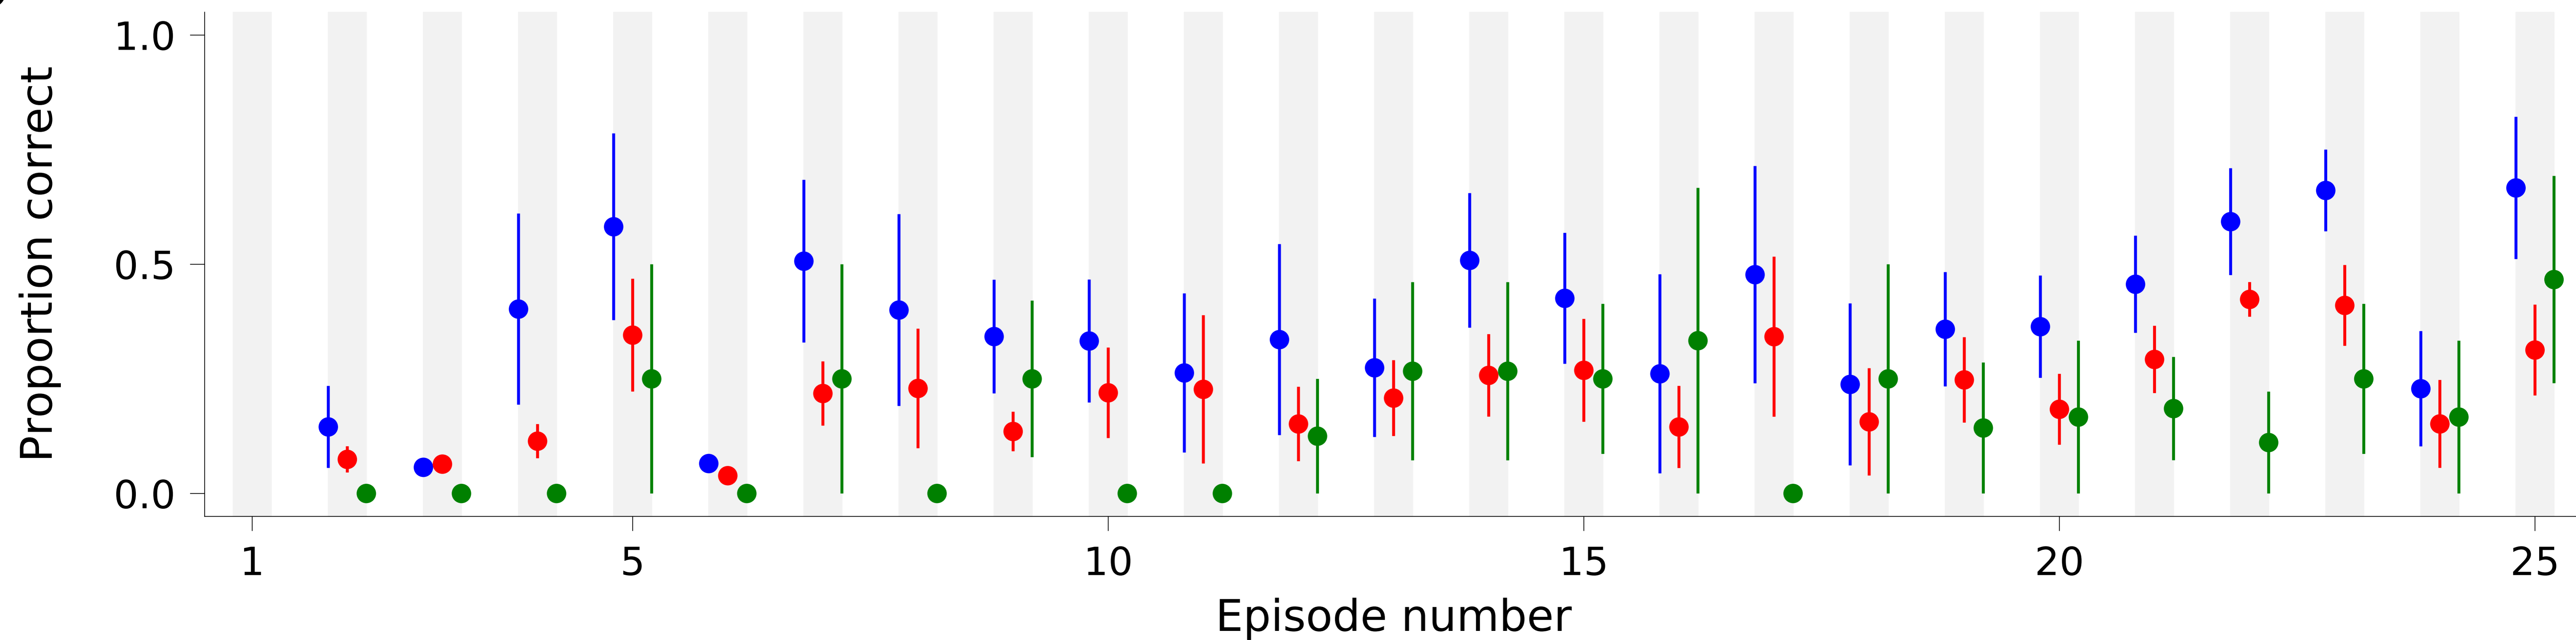

Supplement: supp [file elife-50469-supp-v1.zip › elife_poa_e50469_Figure_6_figure_supplement_2.pdf]

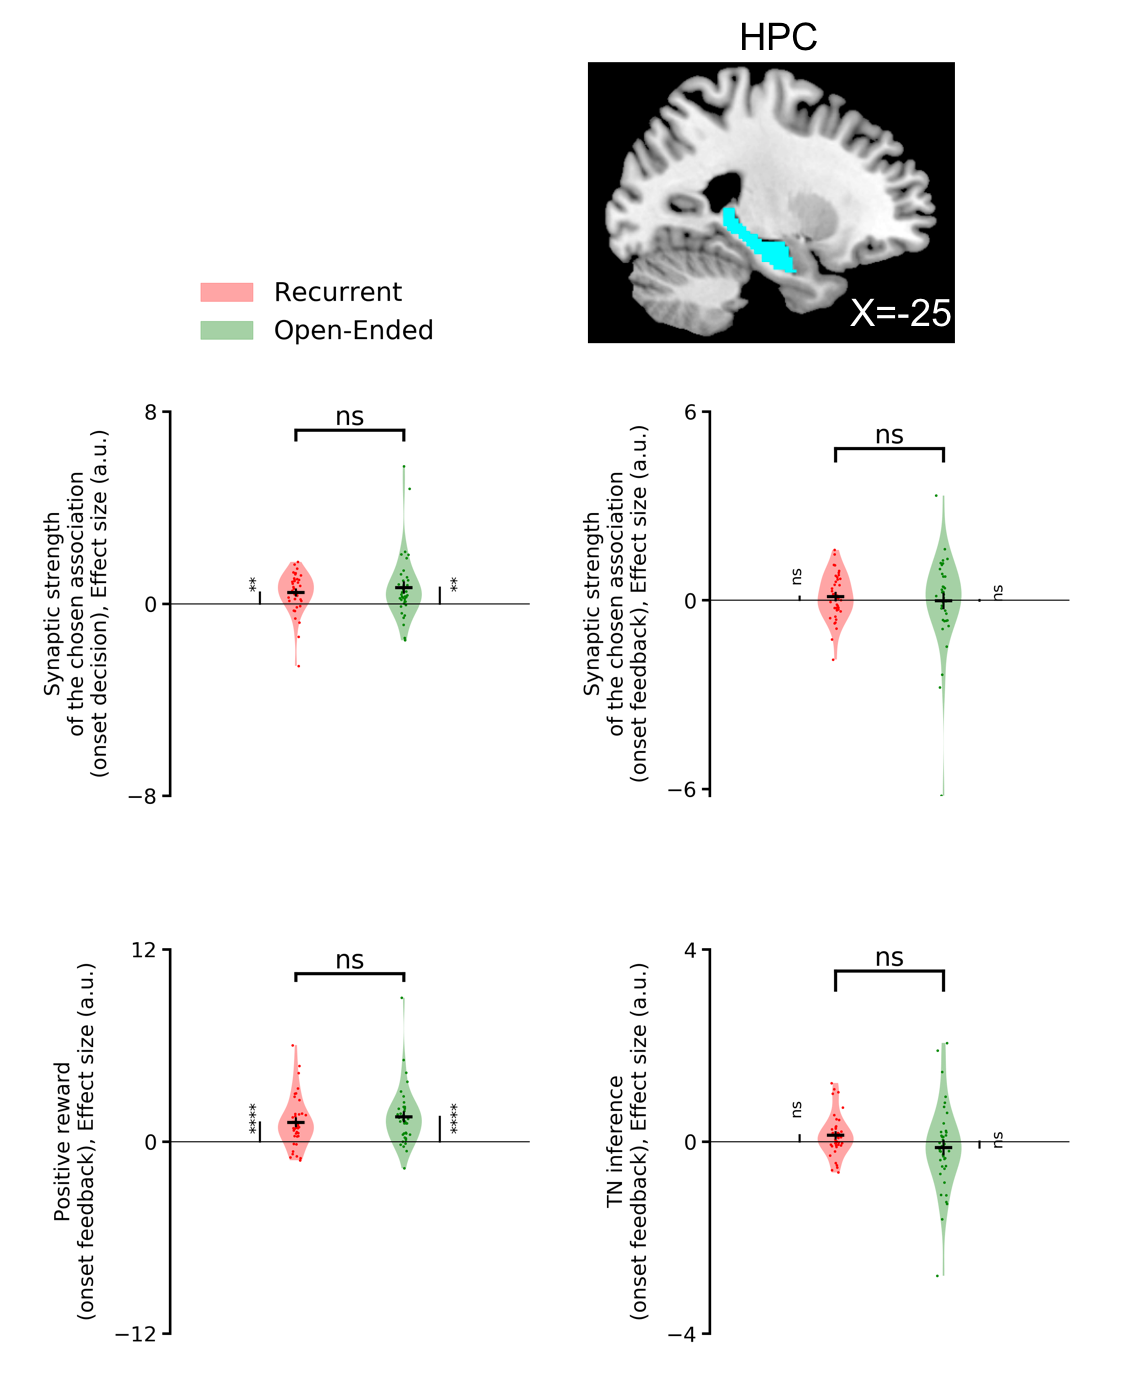

Supplement: supp [file elife-50469-supp-v1.zip › elife_poa_e50469_Figure_8_figure_supplement_1.png]

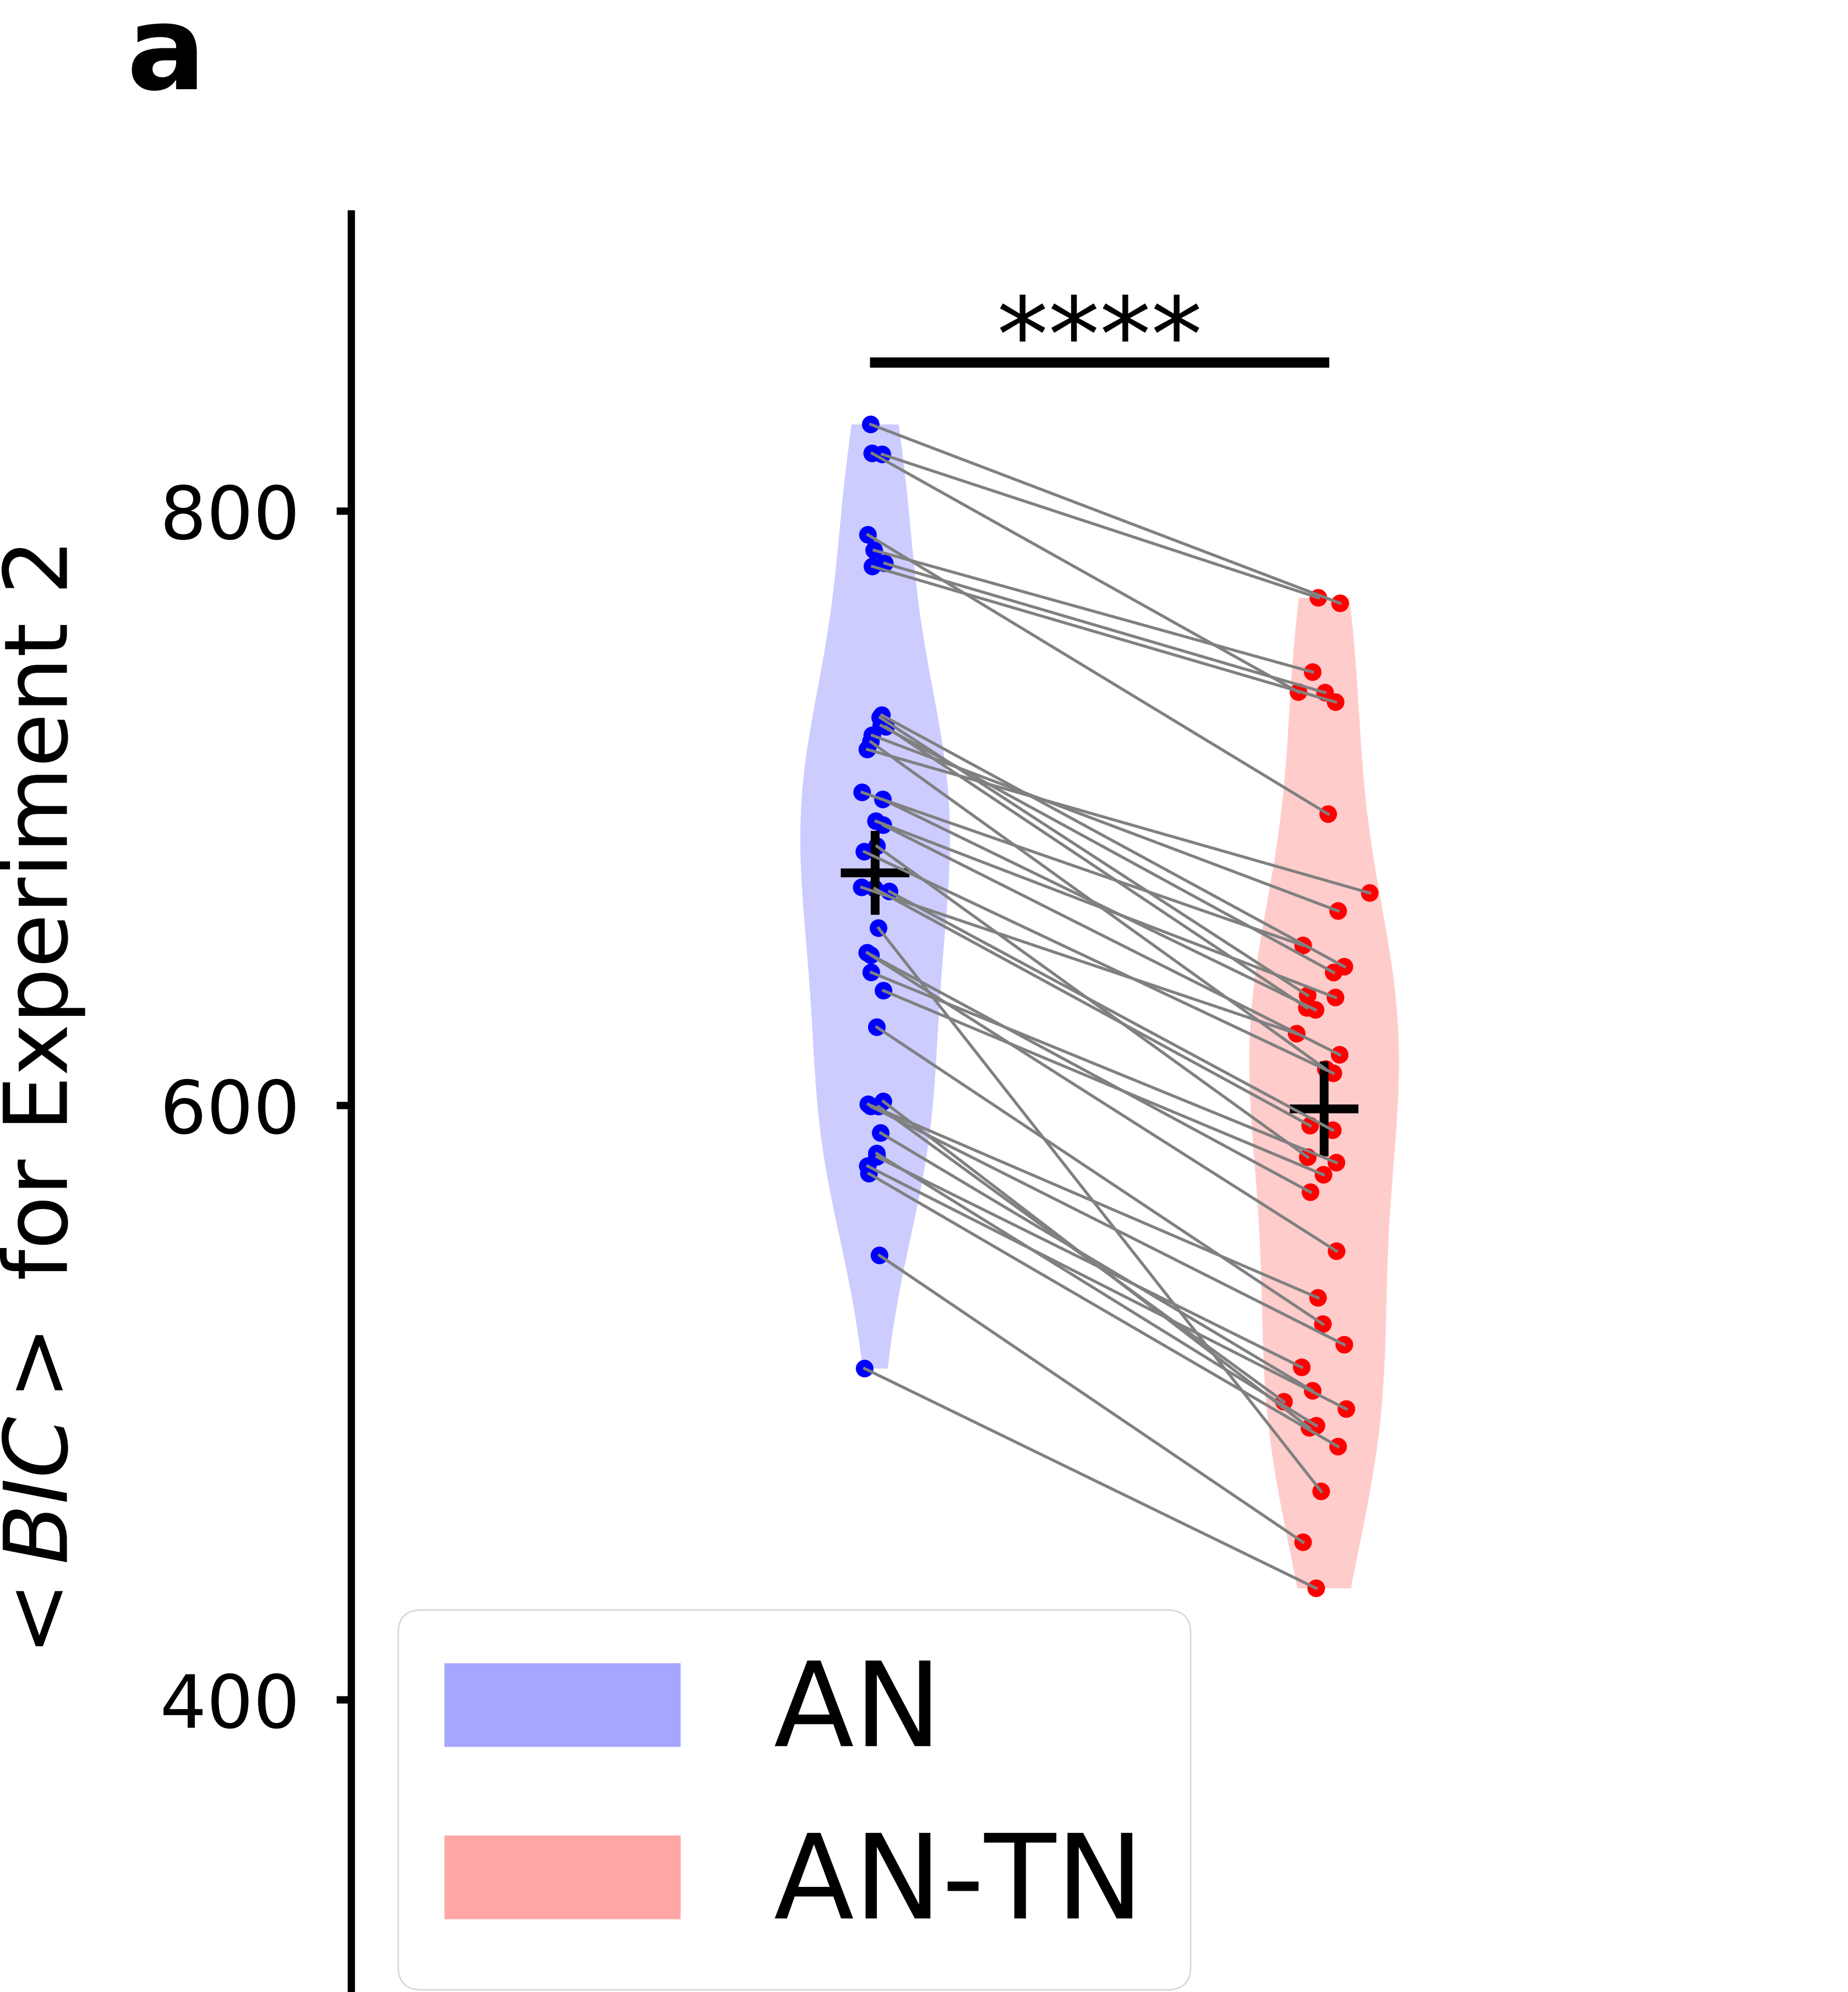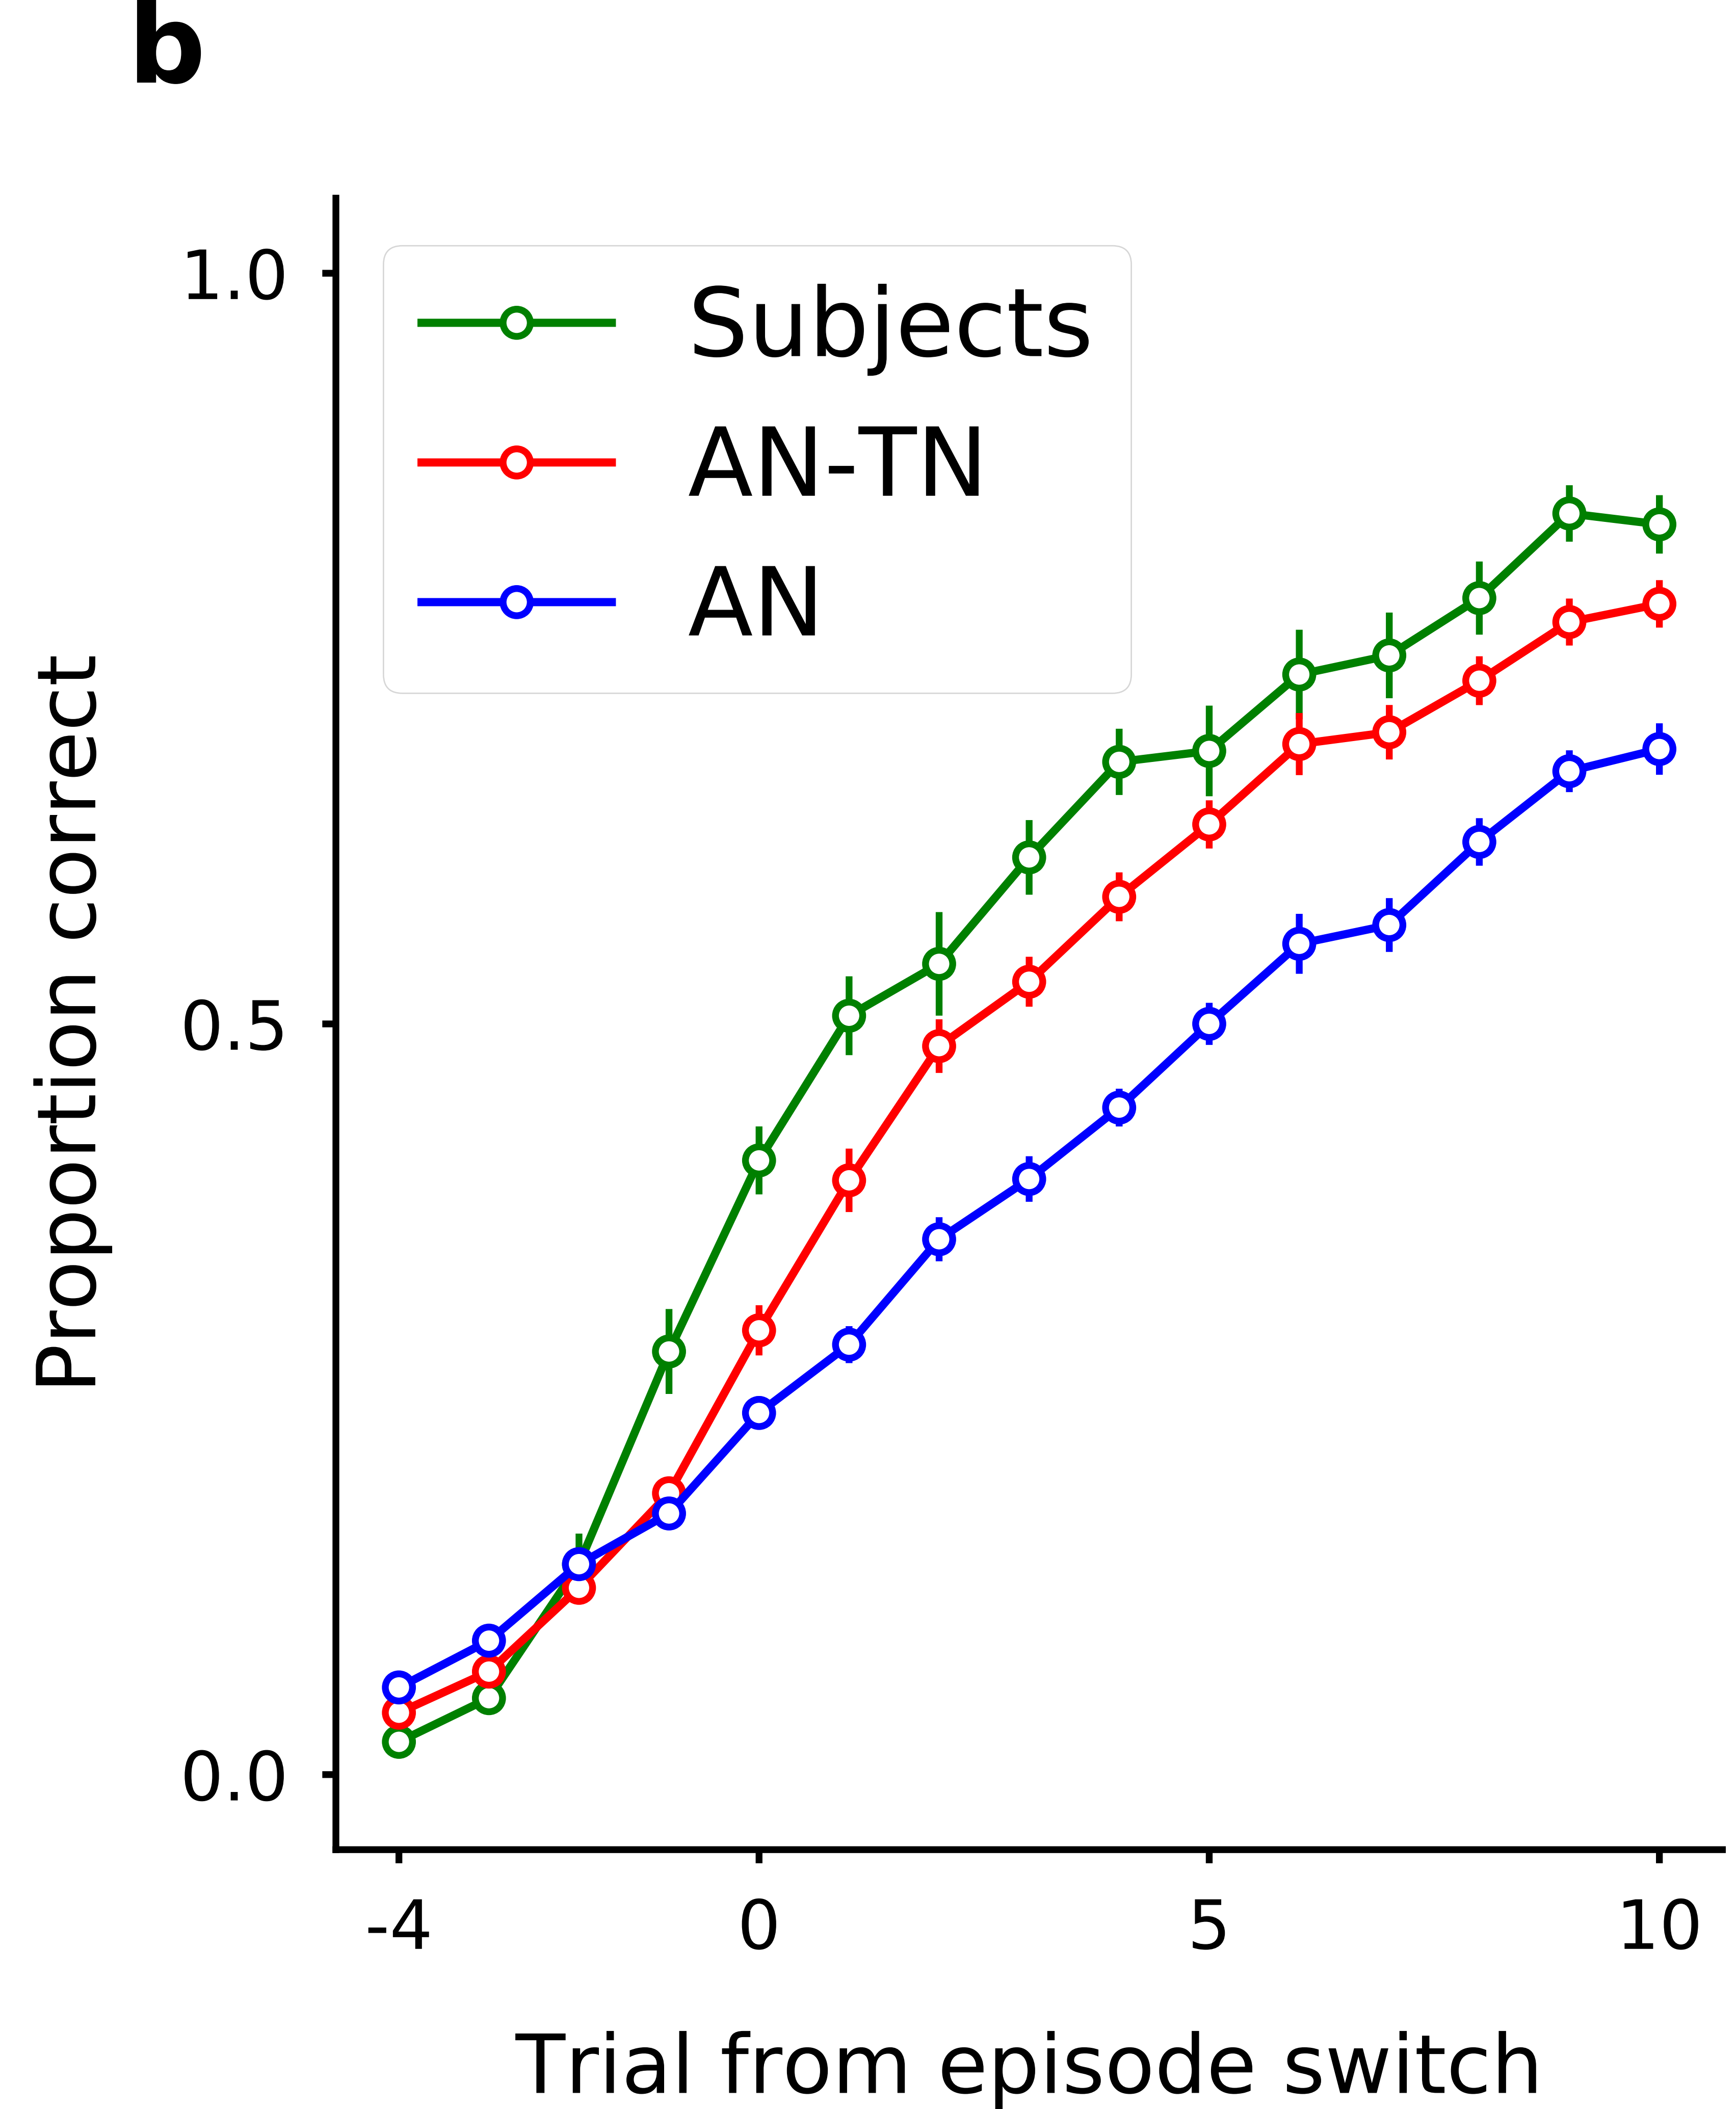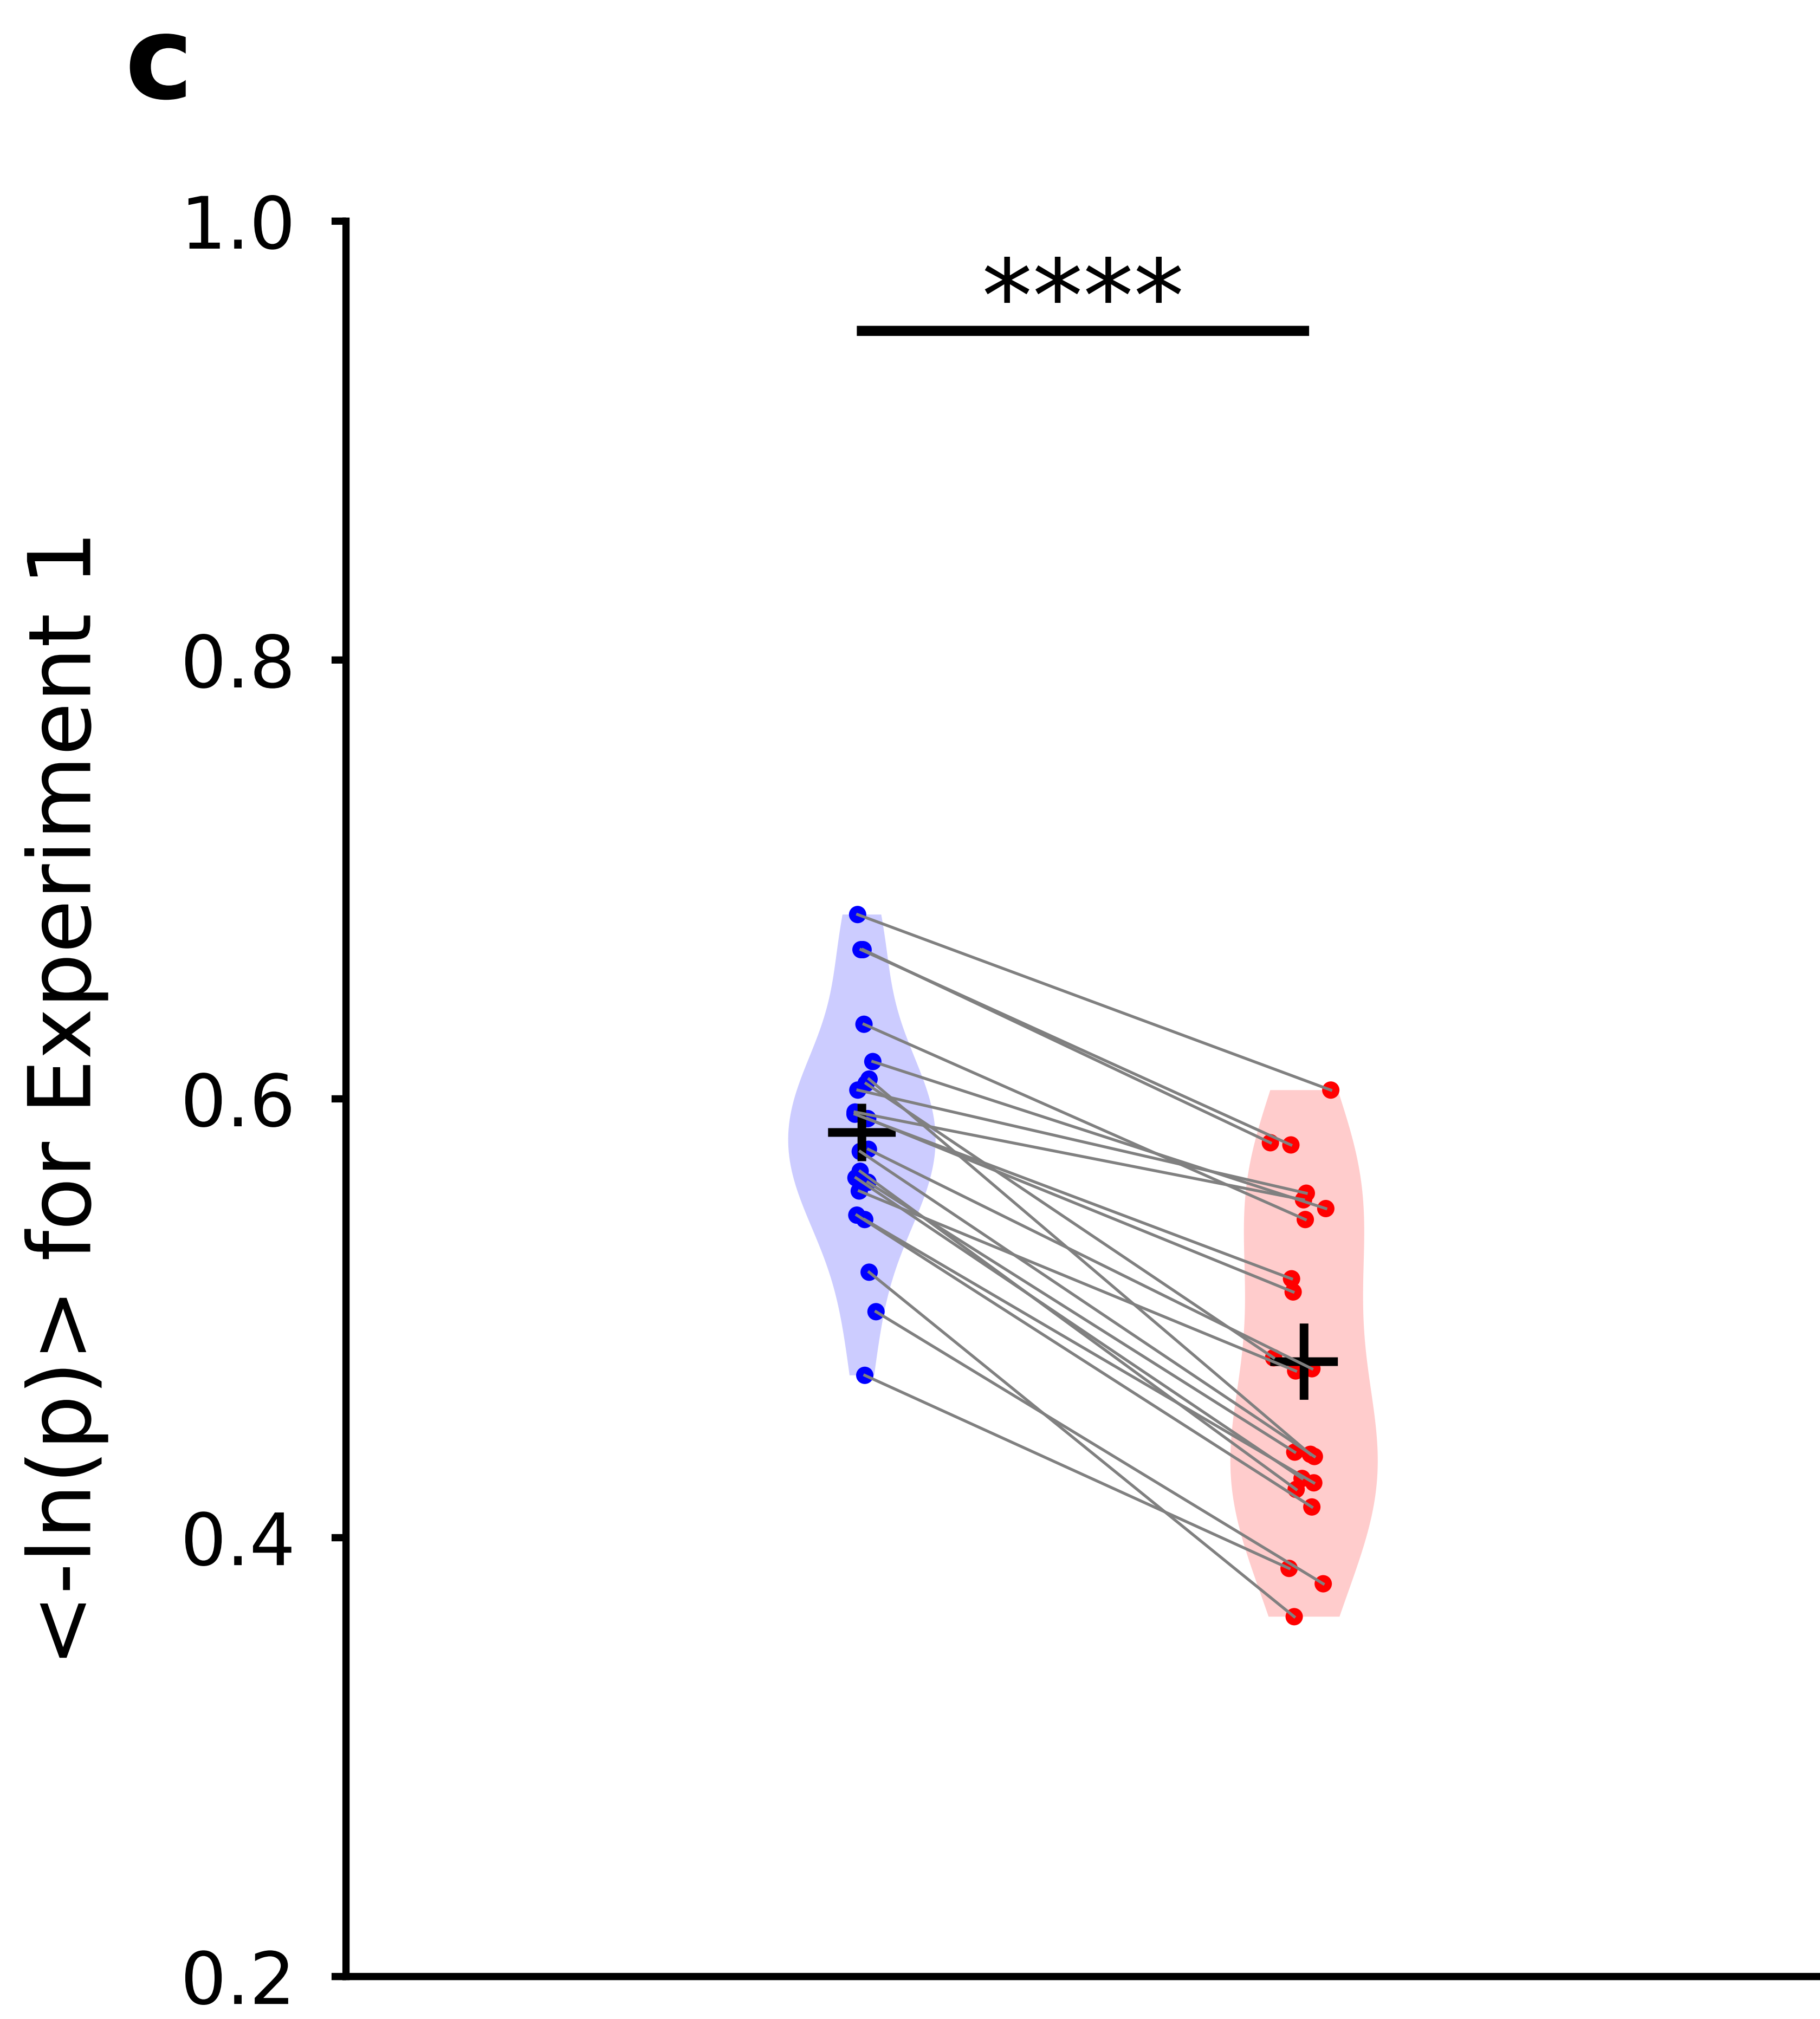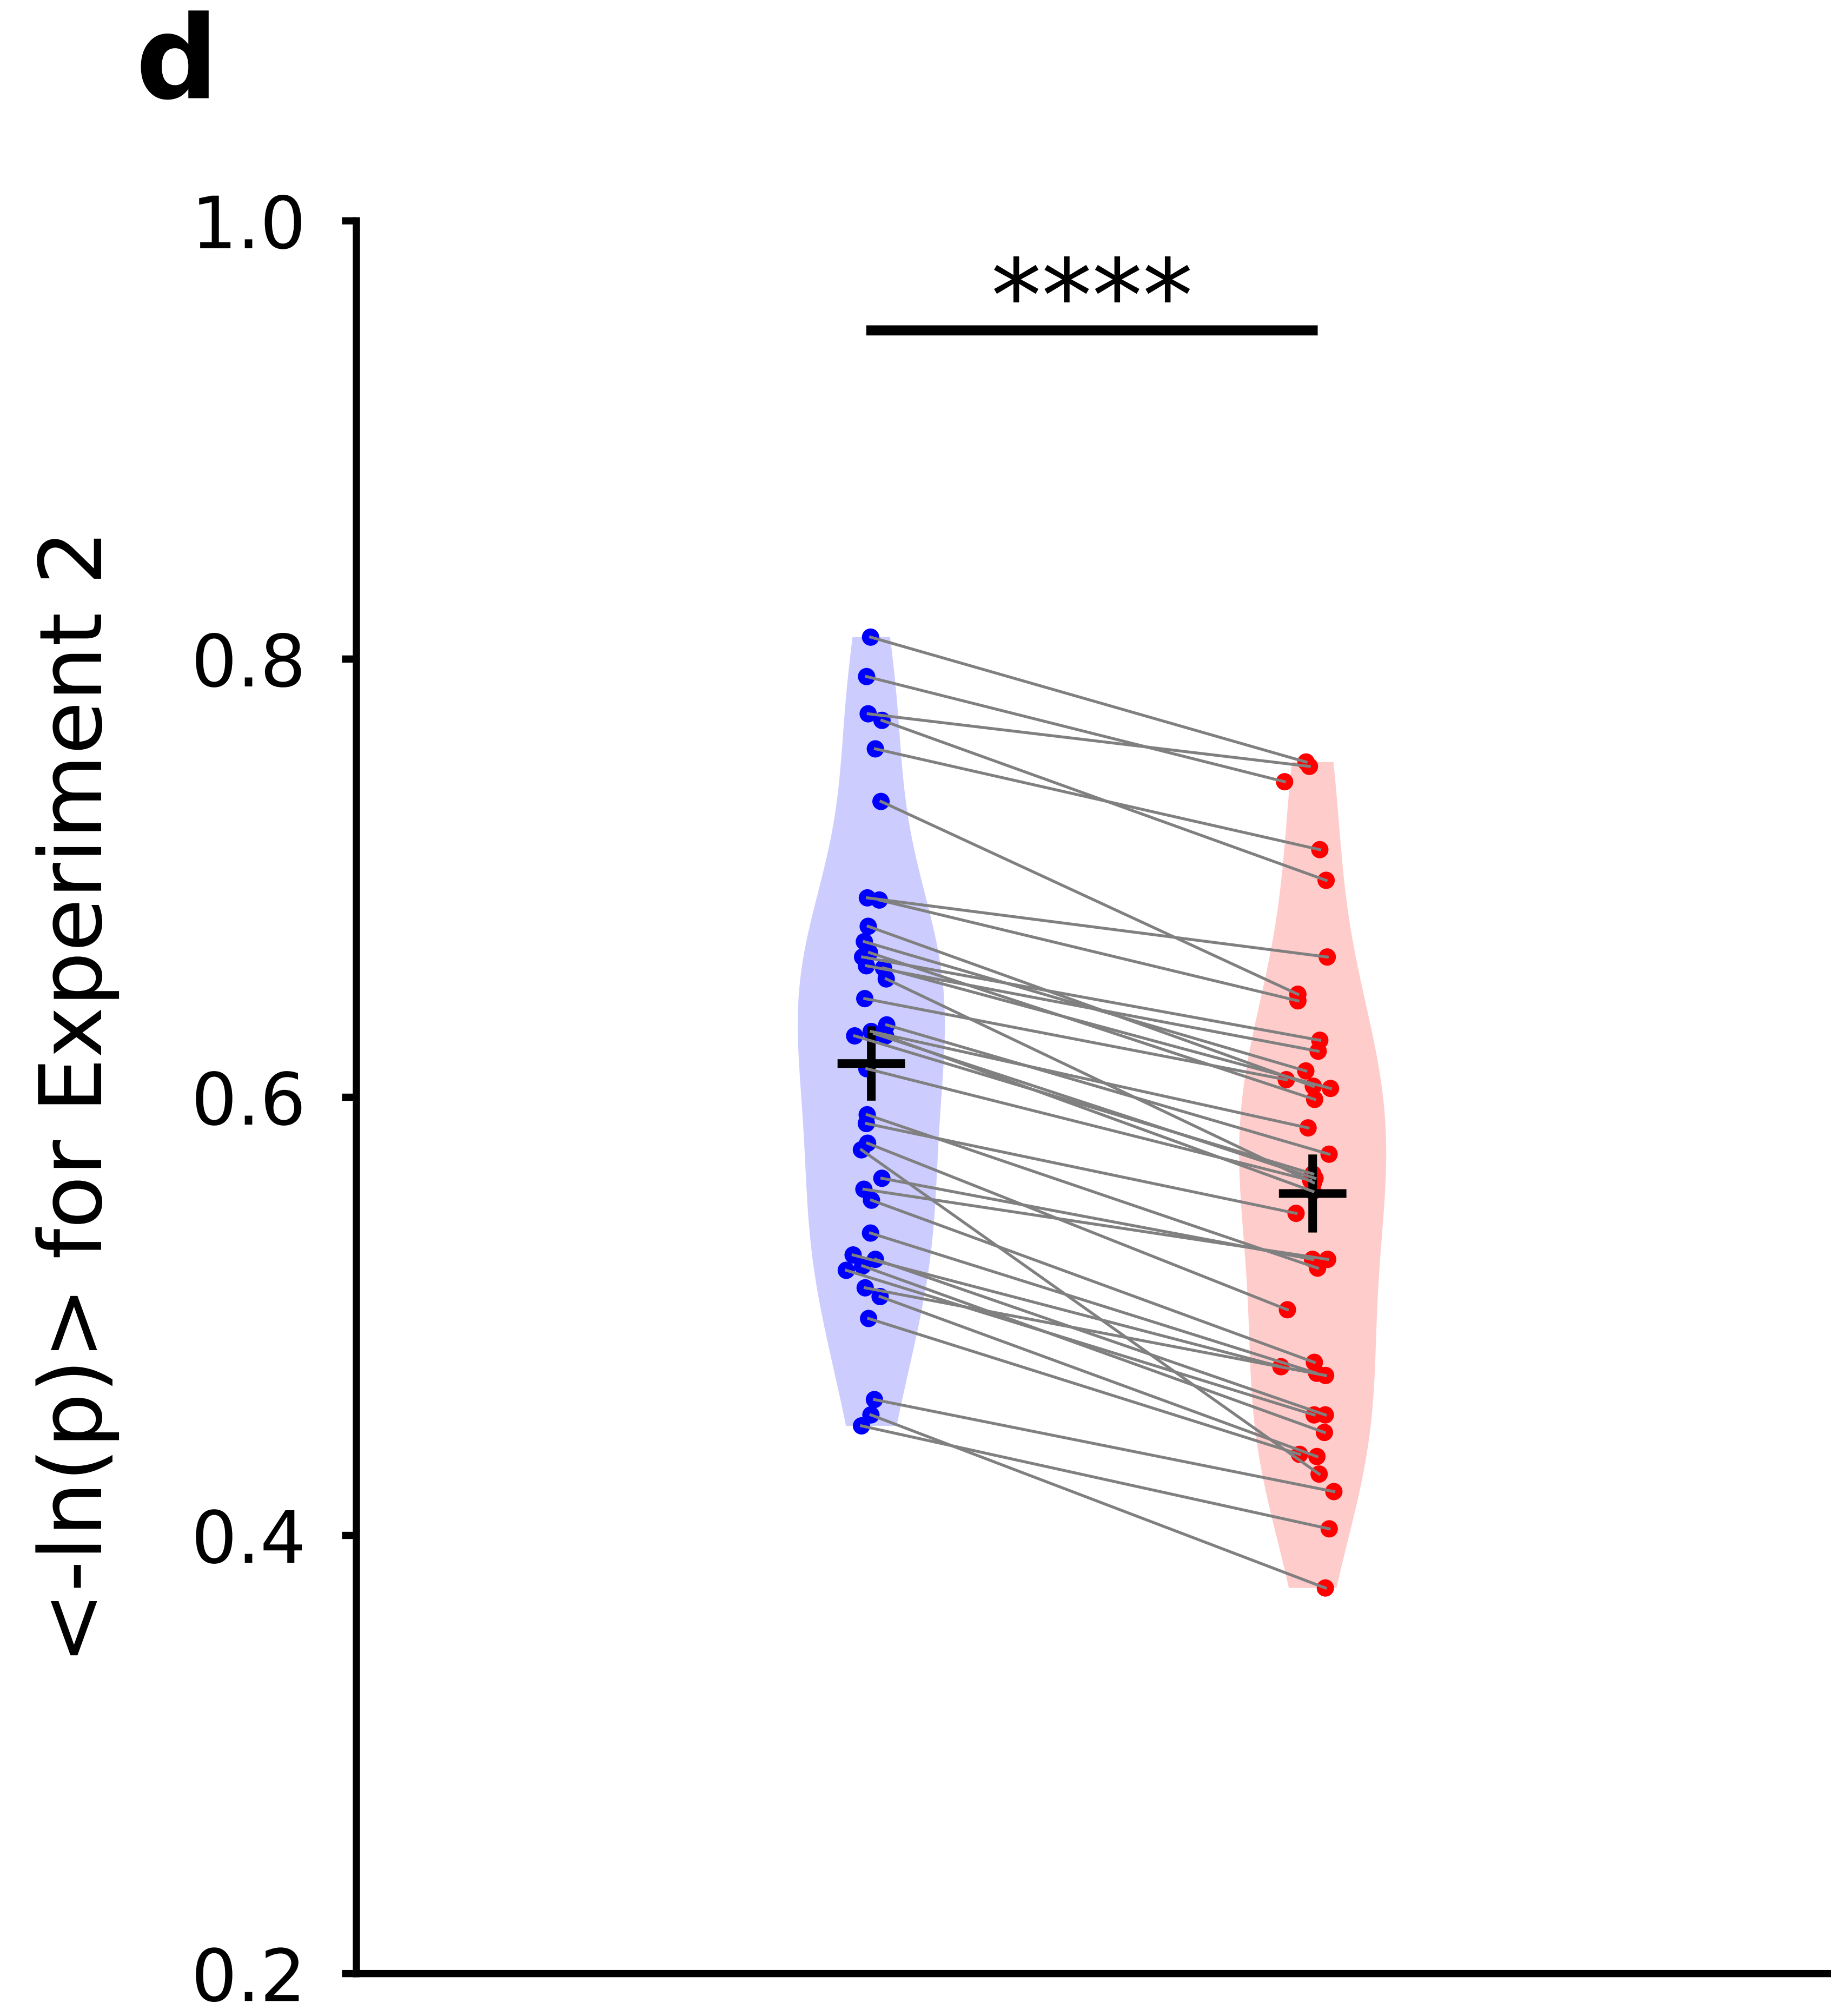

Supplement: supp [file elife-50469-supp-v1.zip › elife_poa_e50469_Figure_5_figure_supplement_1.pdf]

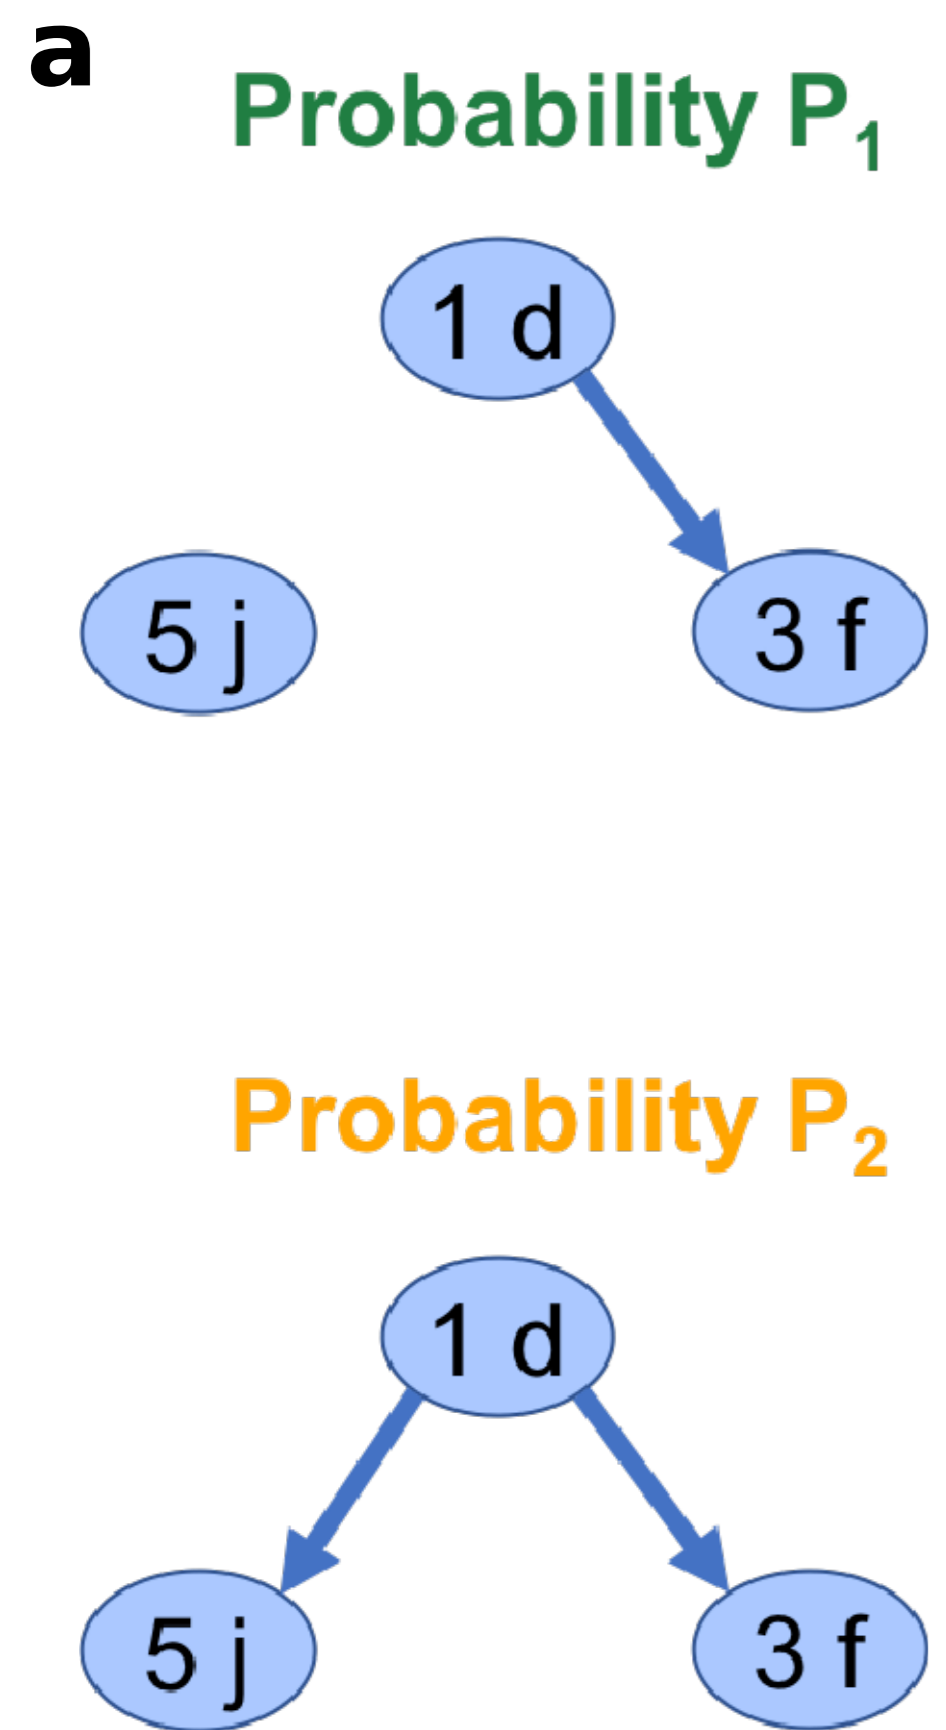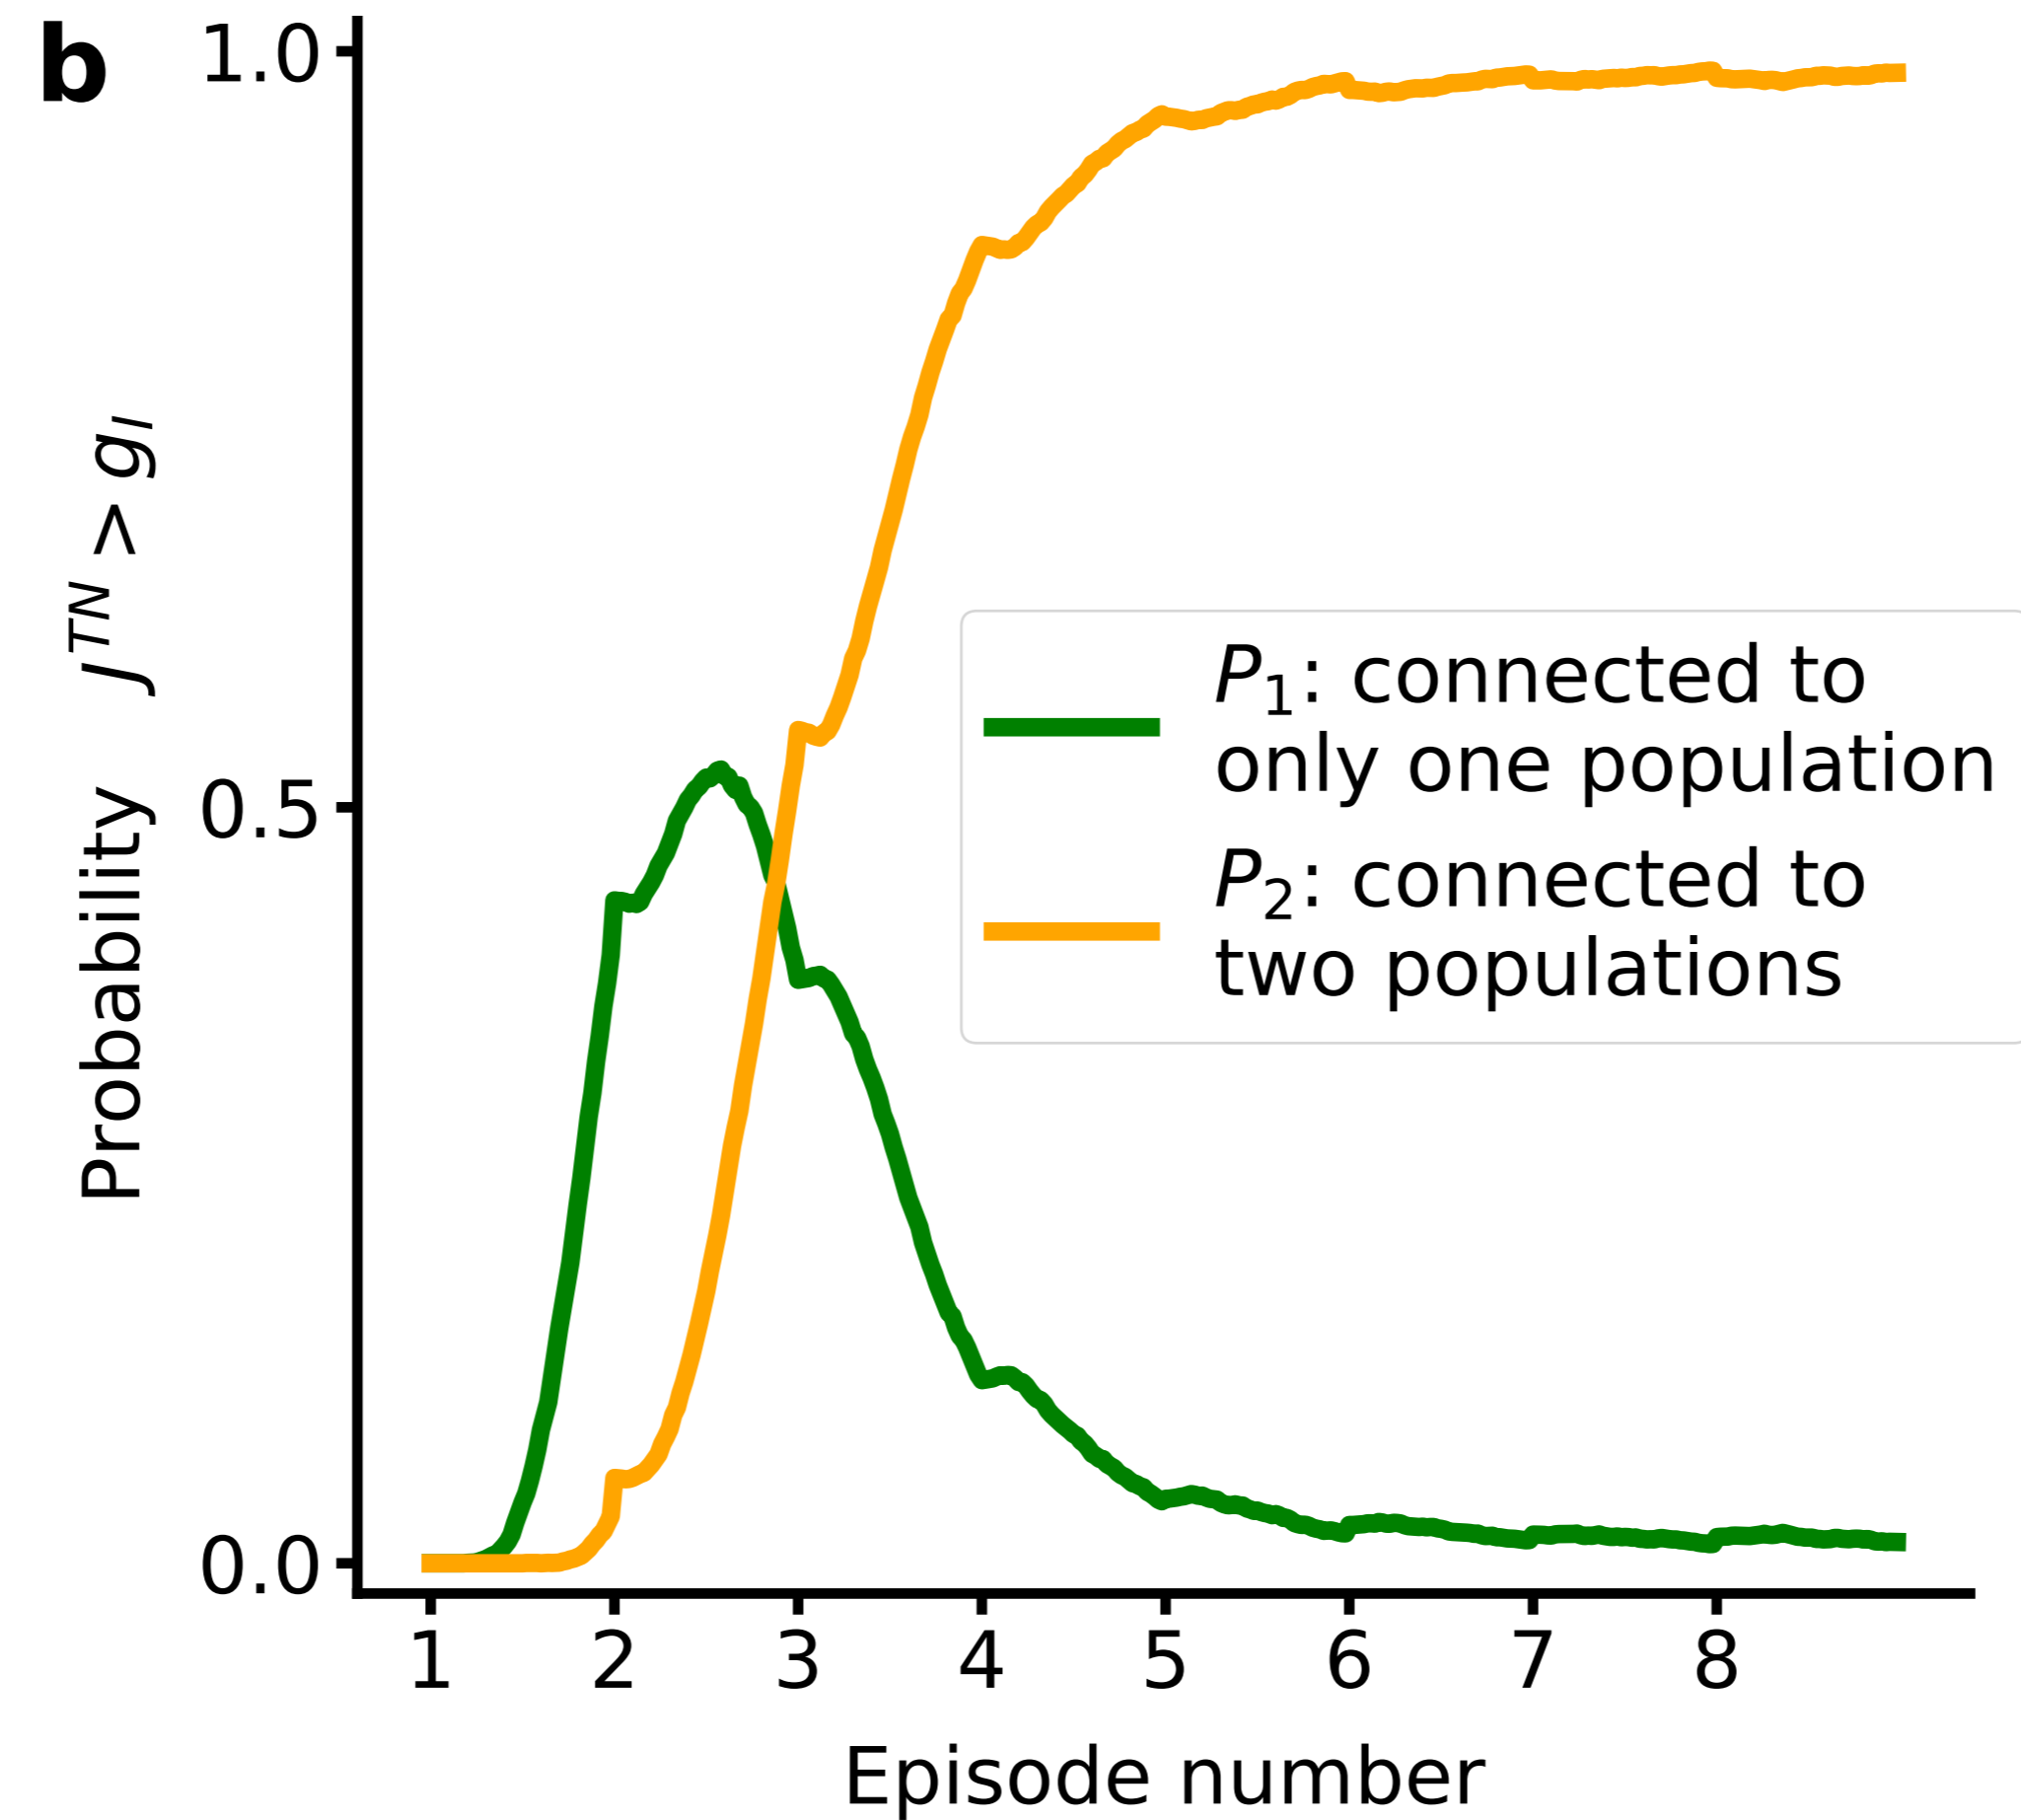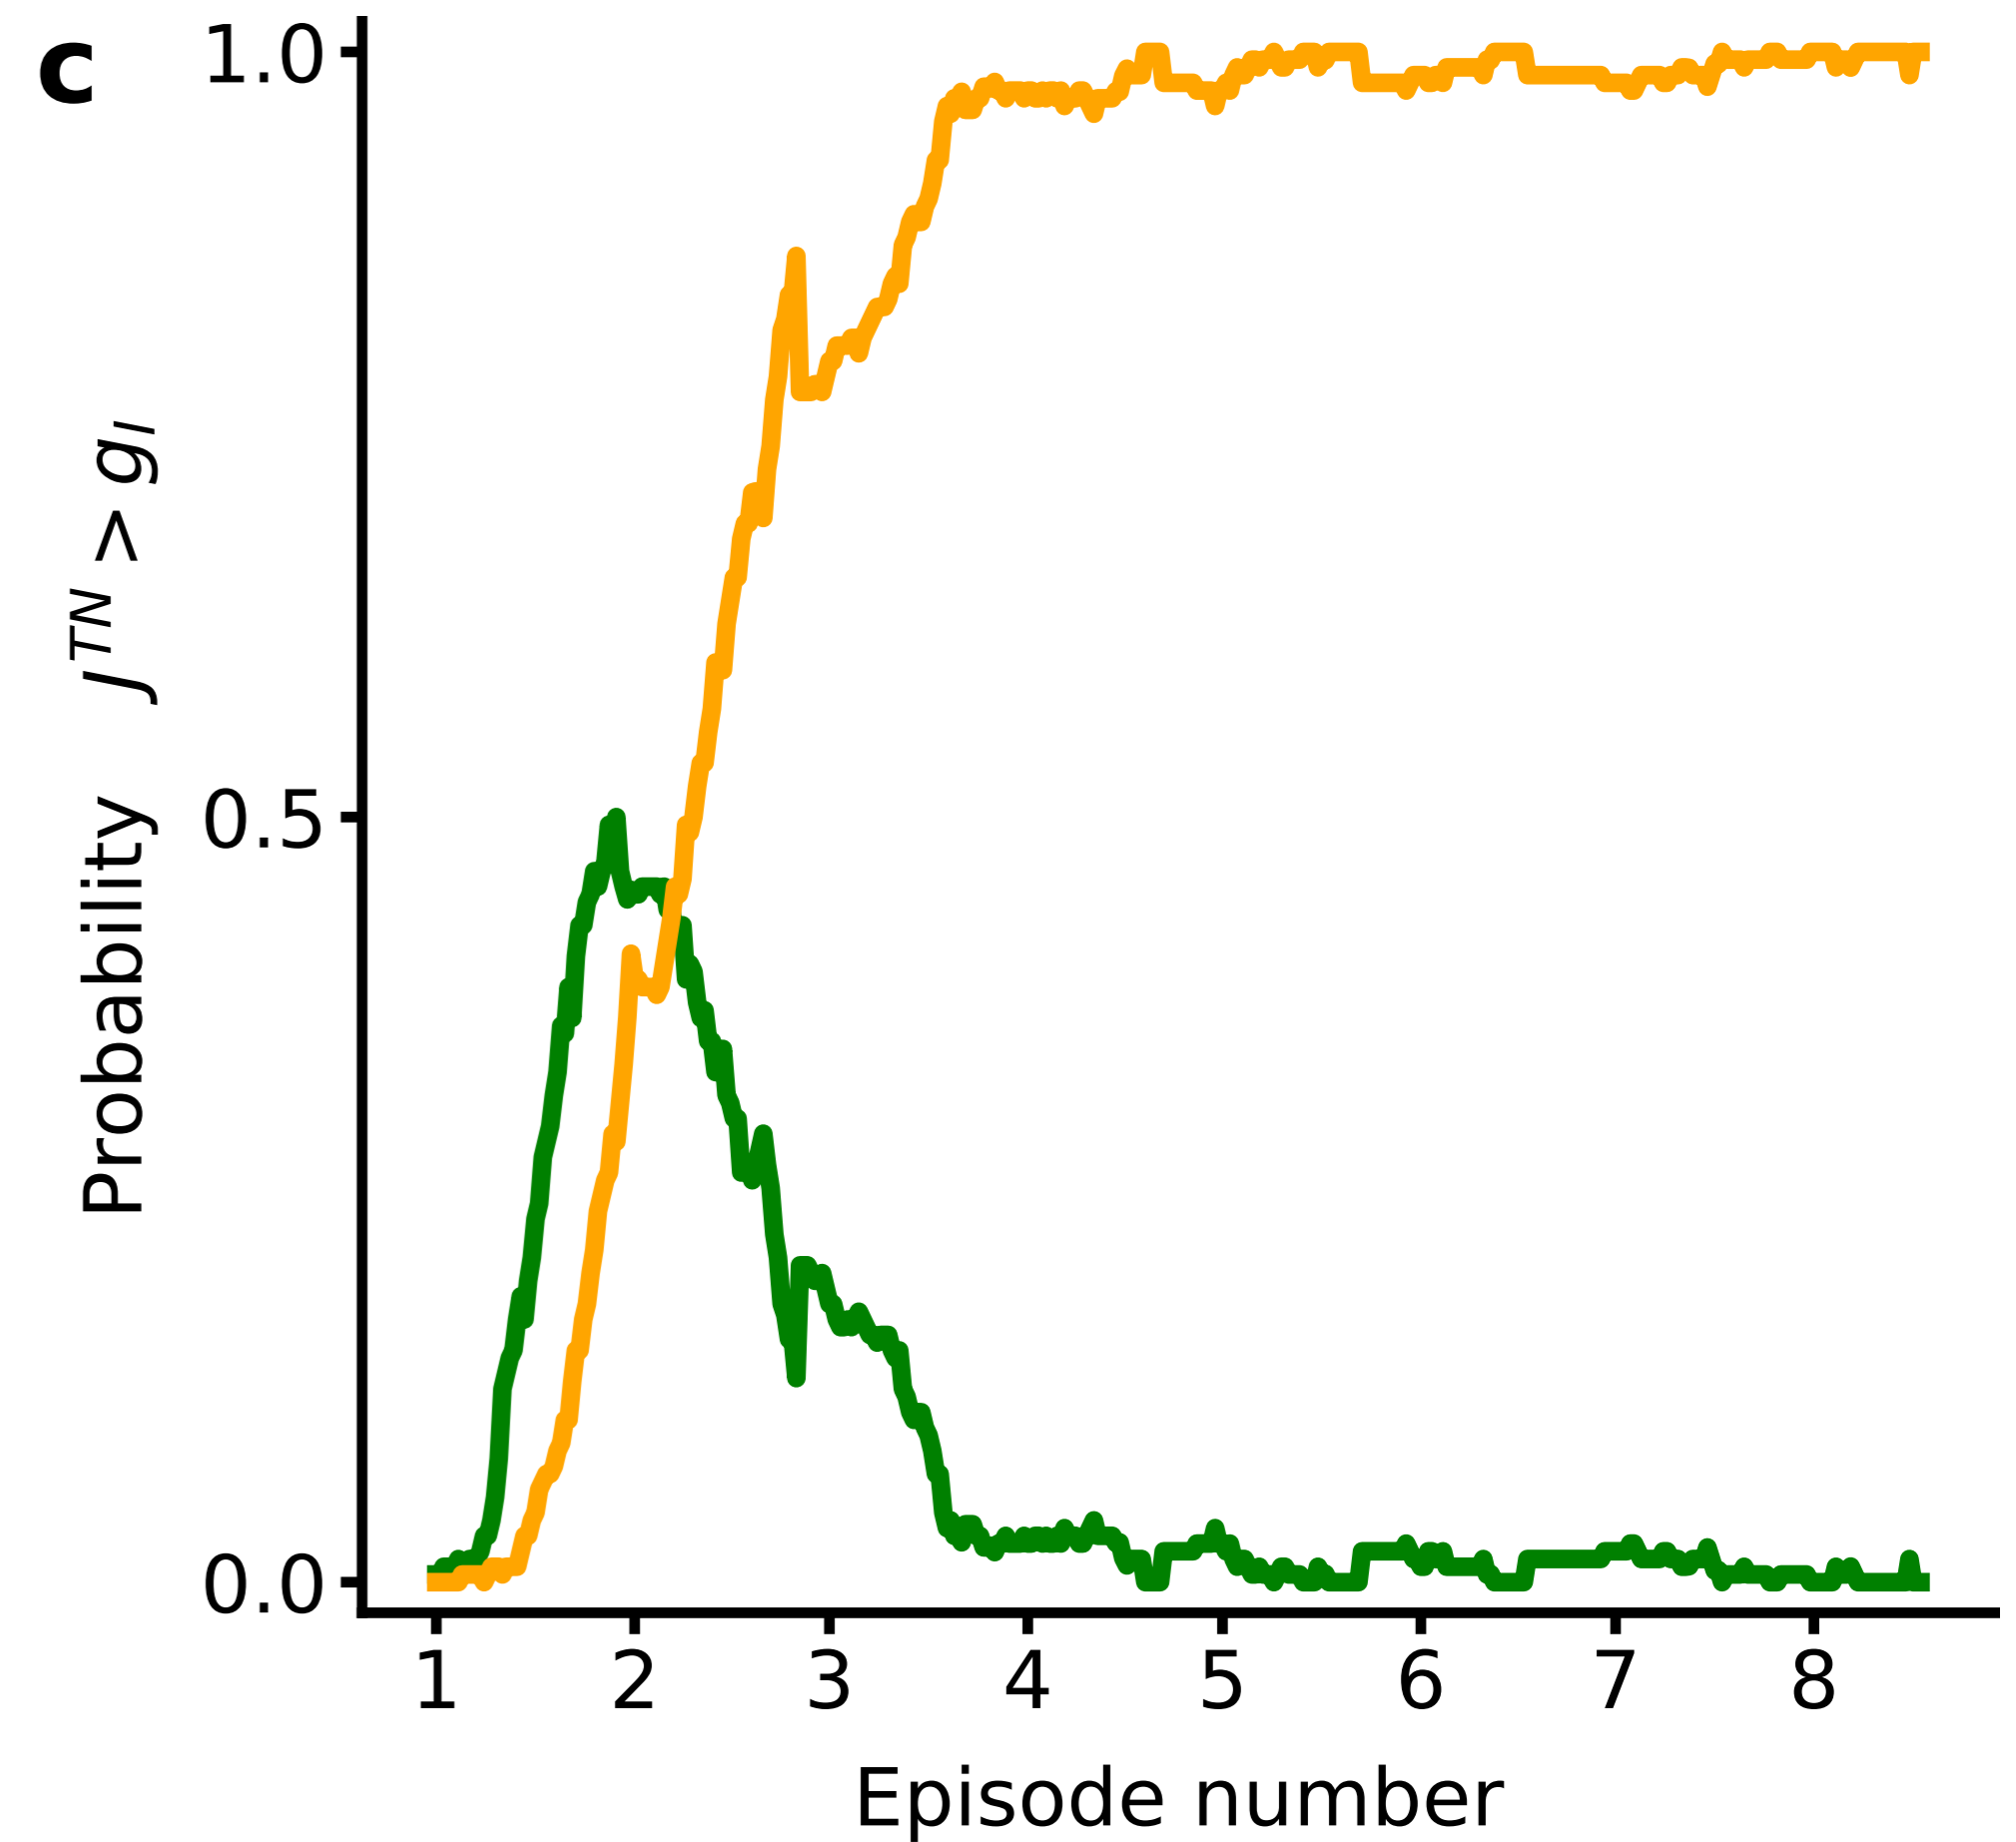

Supplement: supp [file elife-50469-supp-v1.zip › elife_poa_e50469_Figure_3_figure_supplement_1.pdf]

Number of subjects

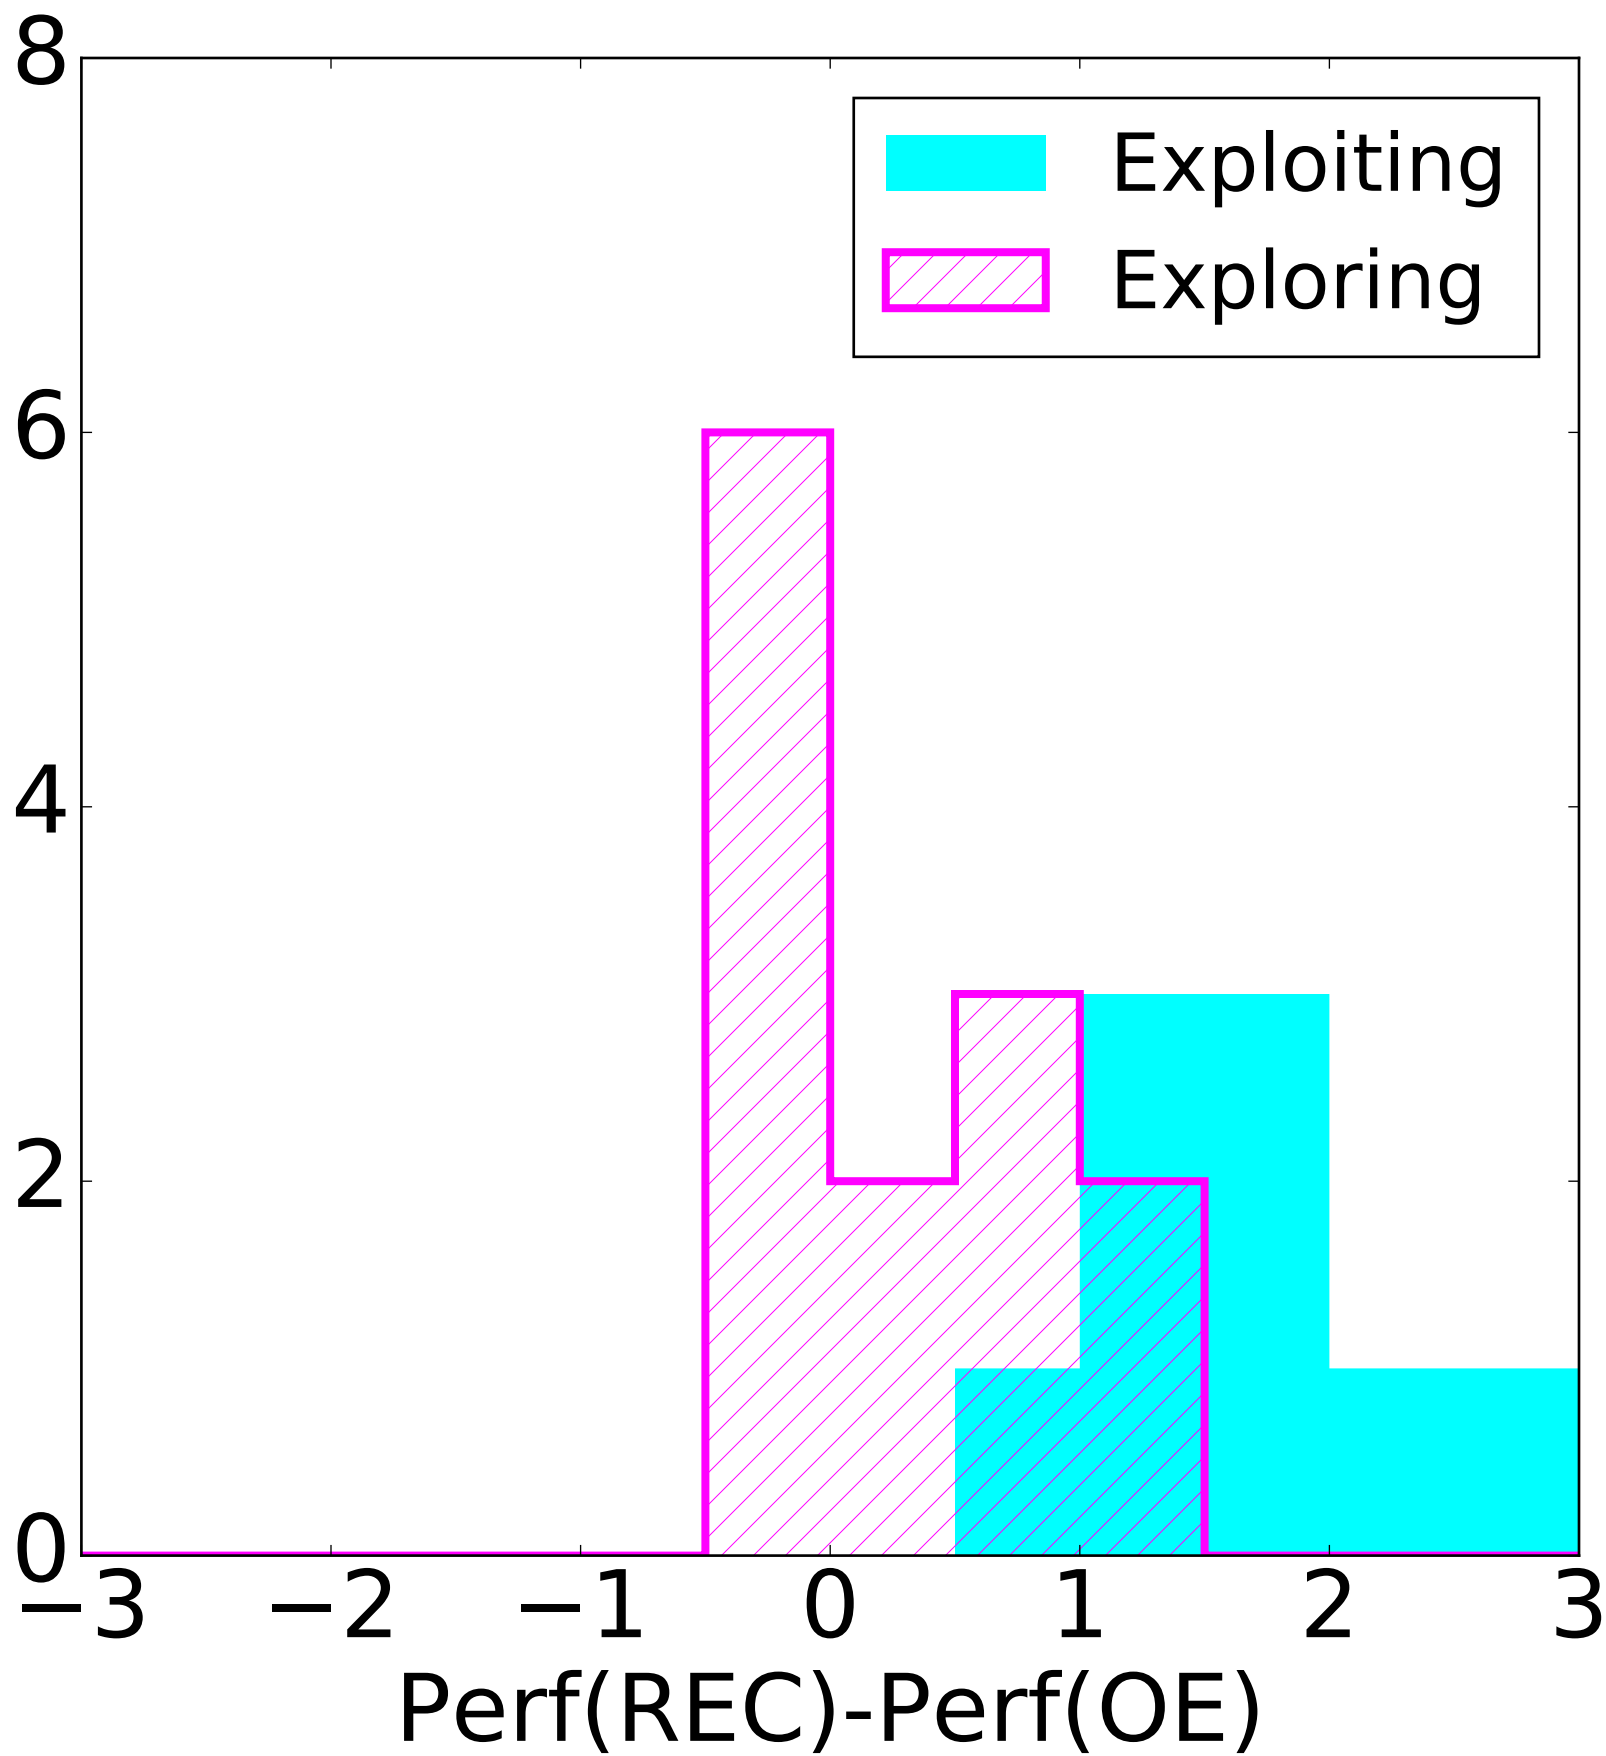

Supplement: supp [file elife-50469-supp-v1.zip › elife_poa_e50469_Figure_6_figure_supplement_3.pdf]

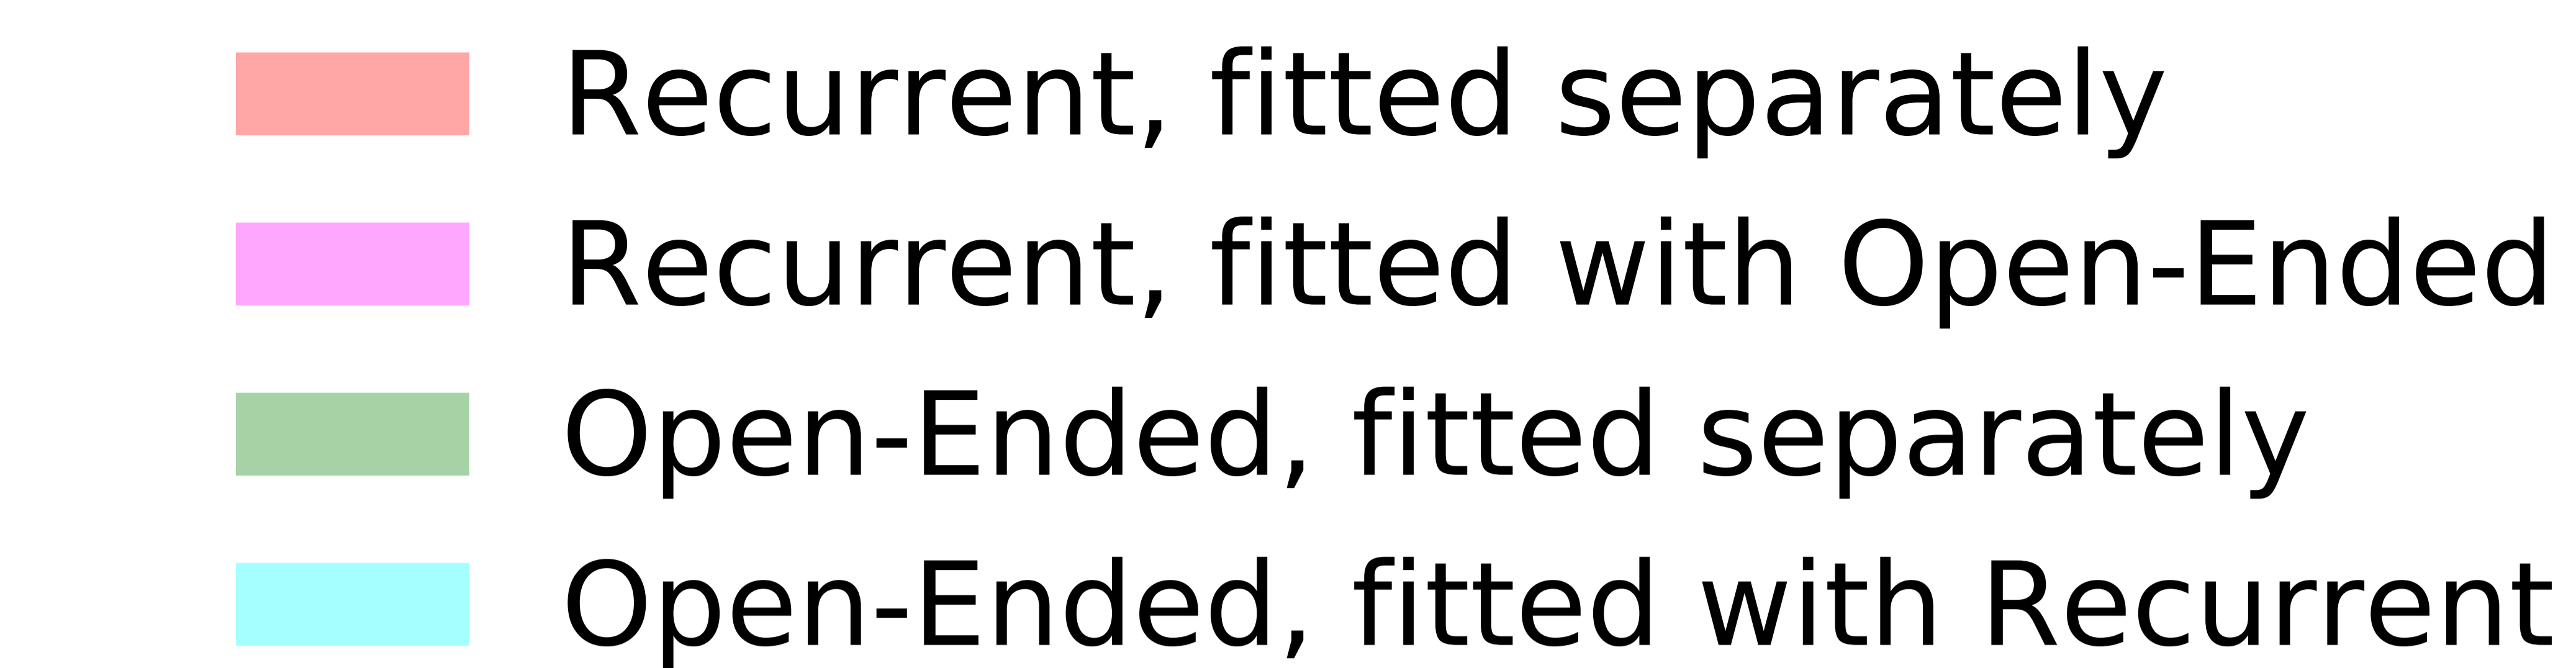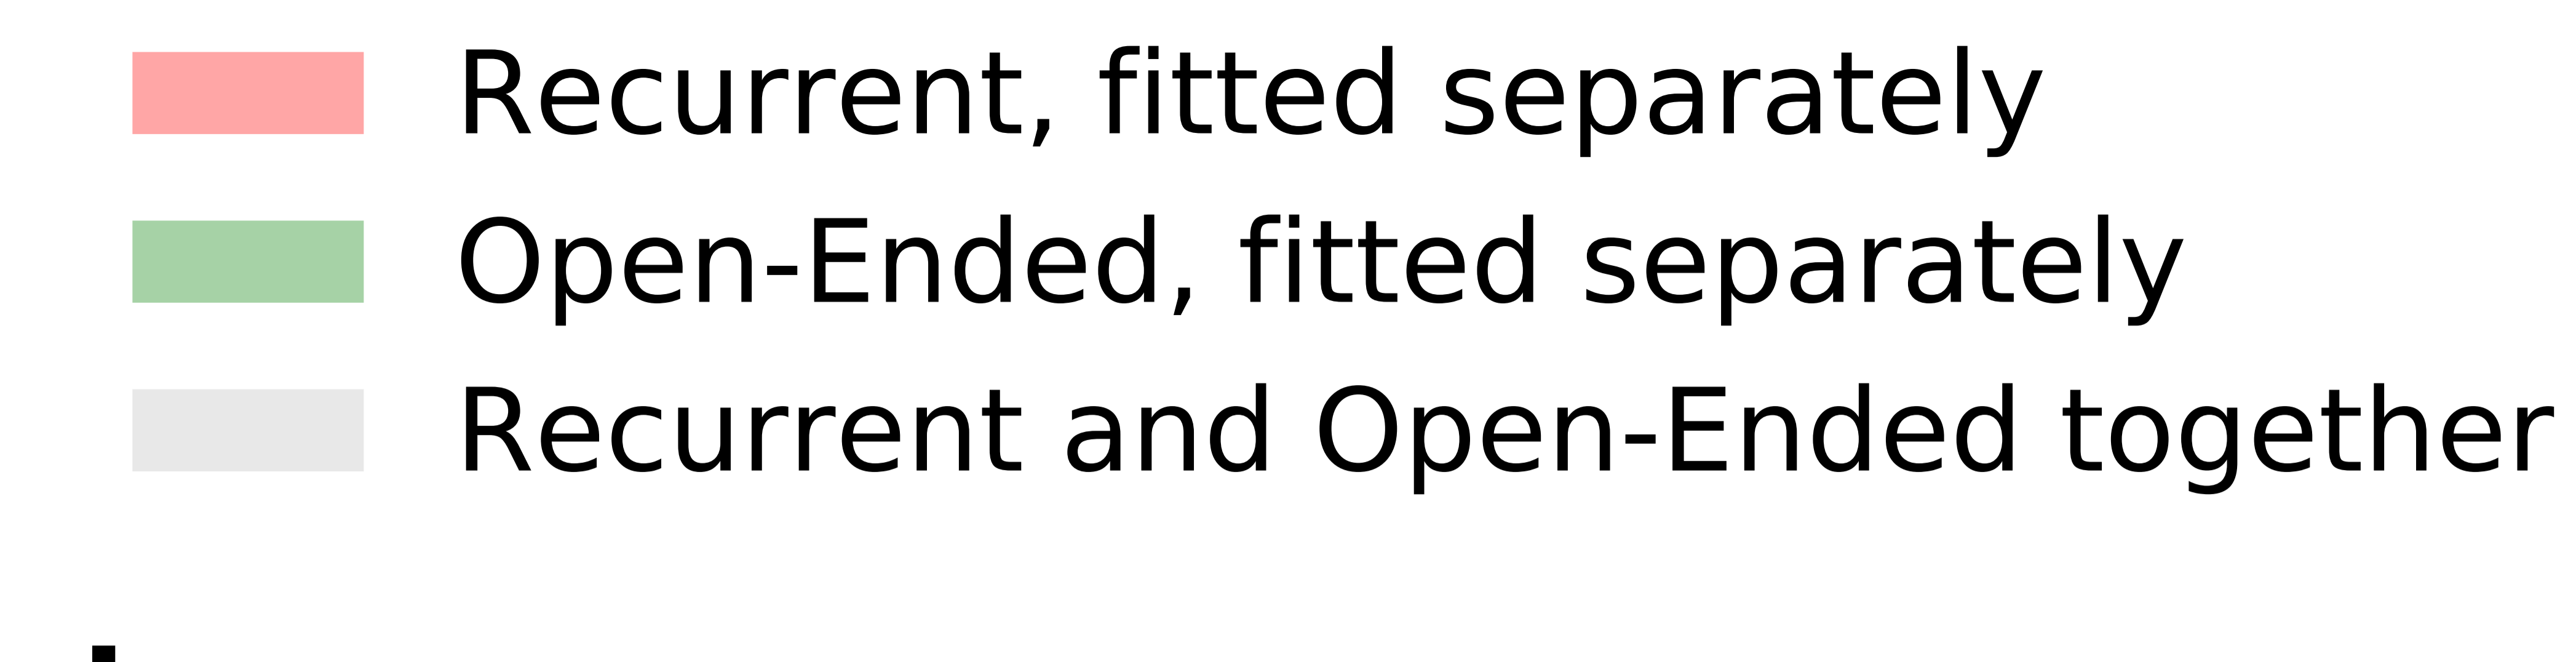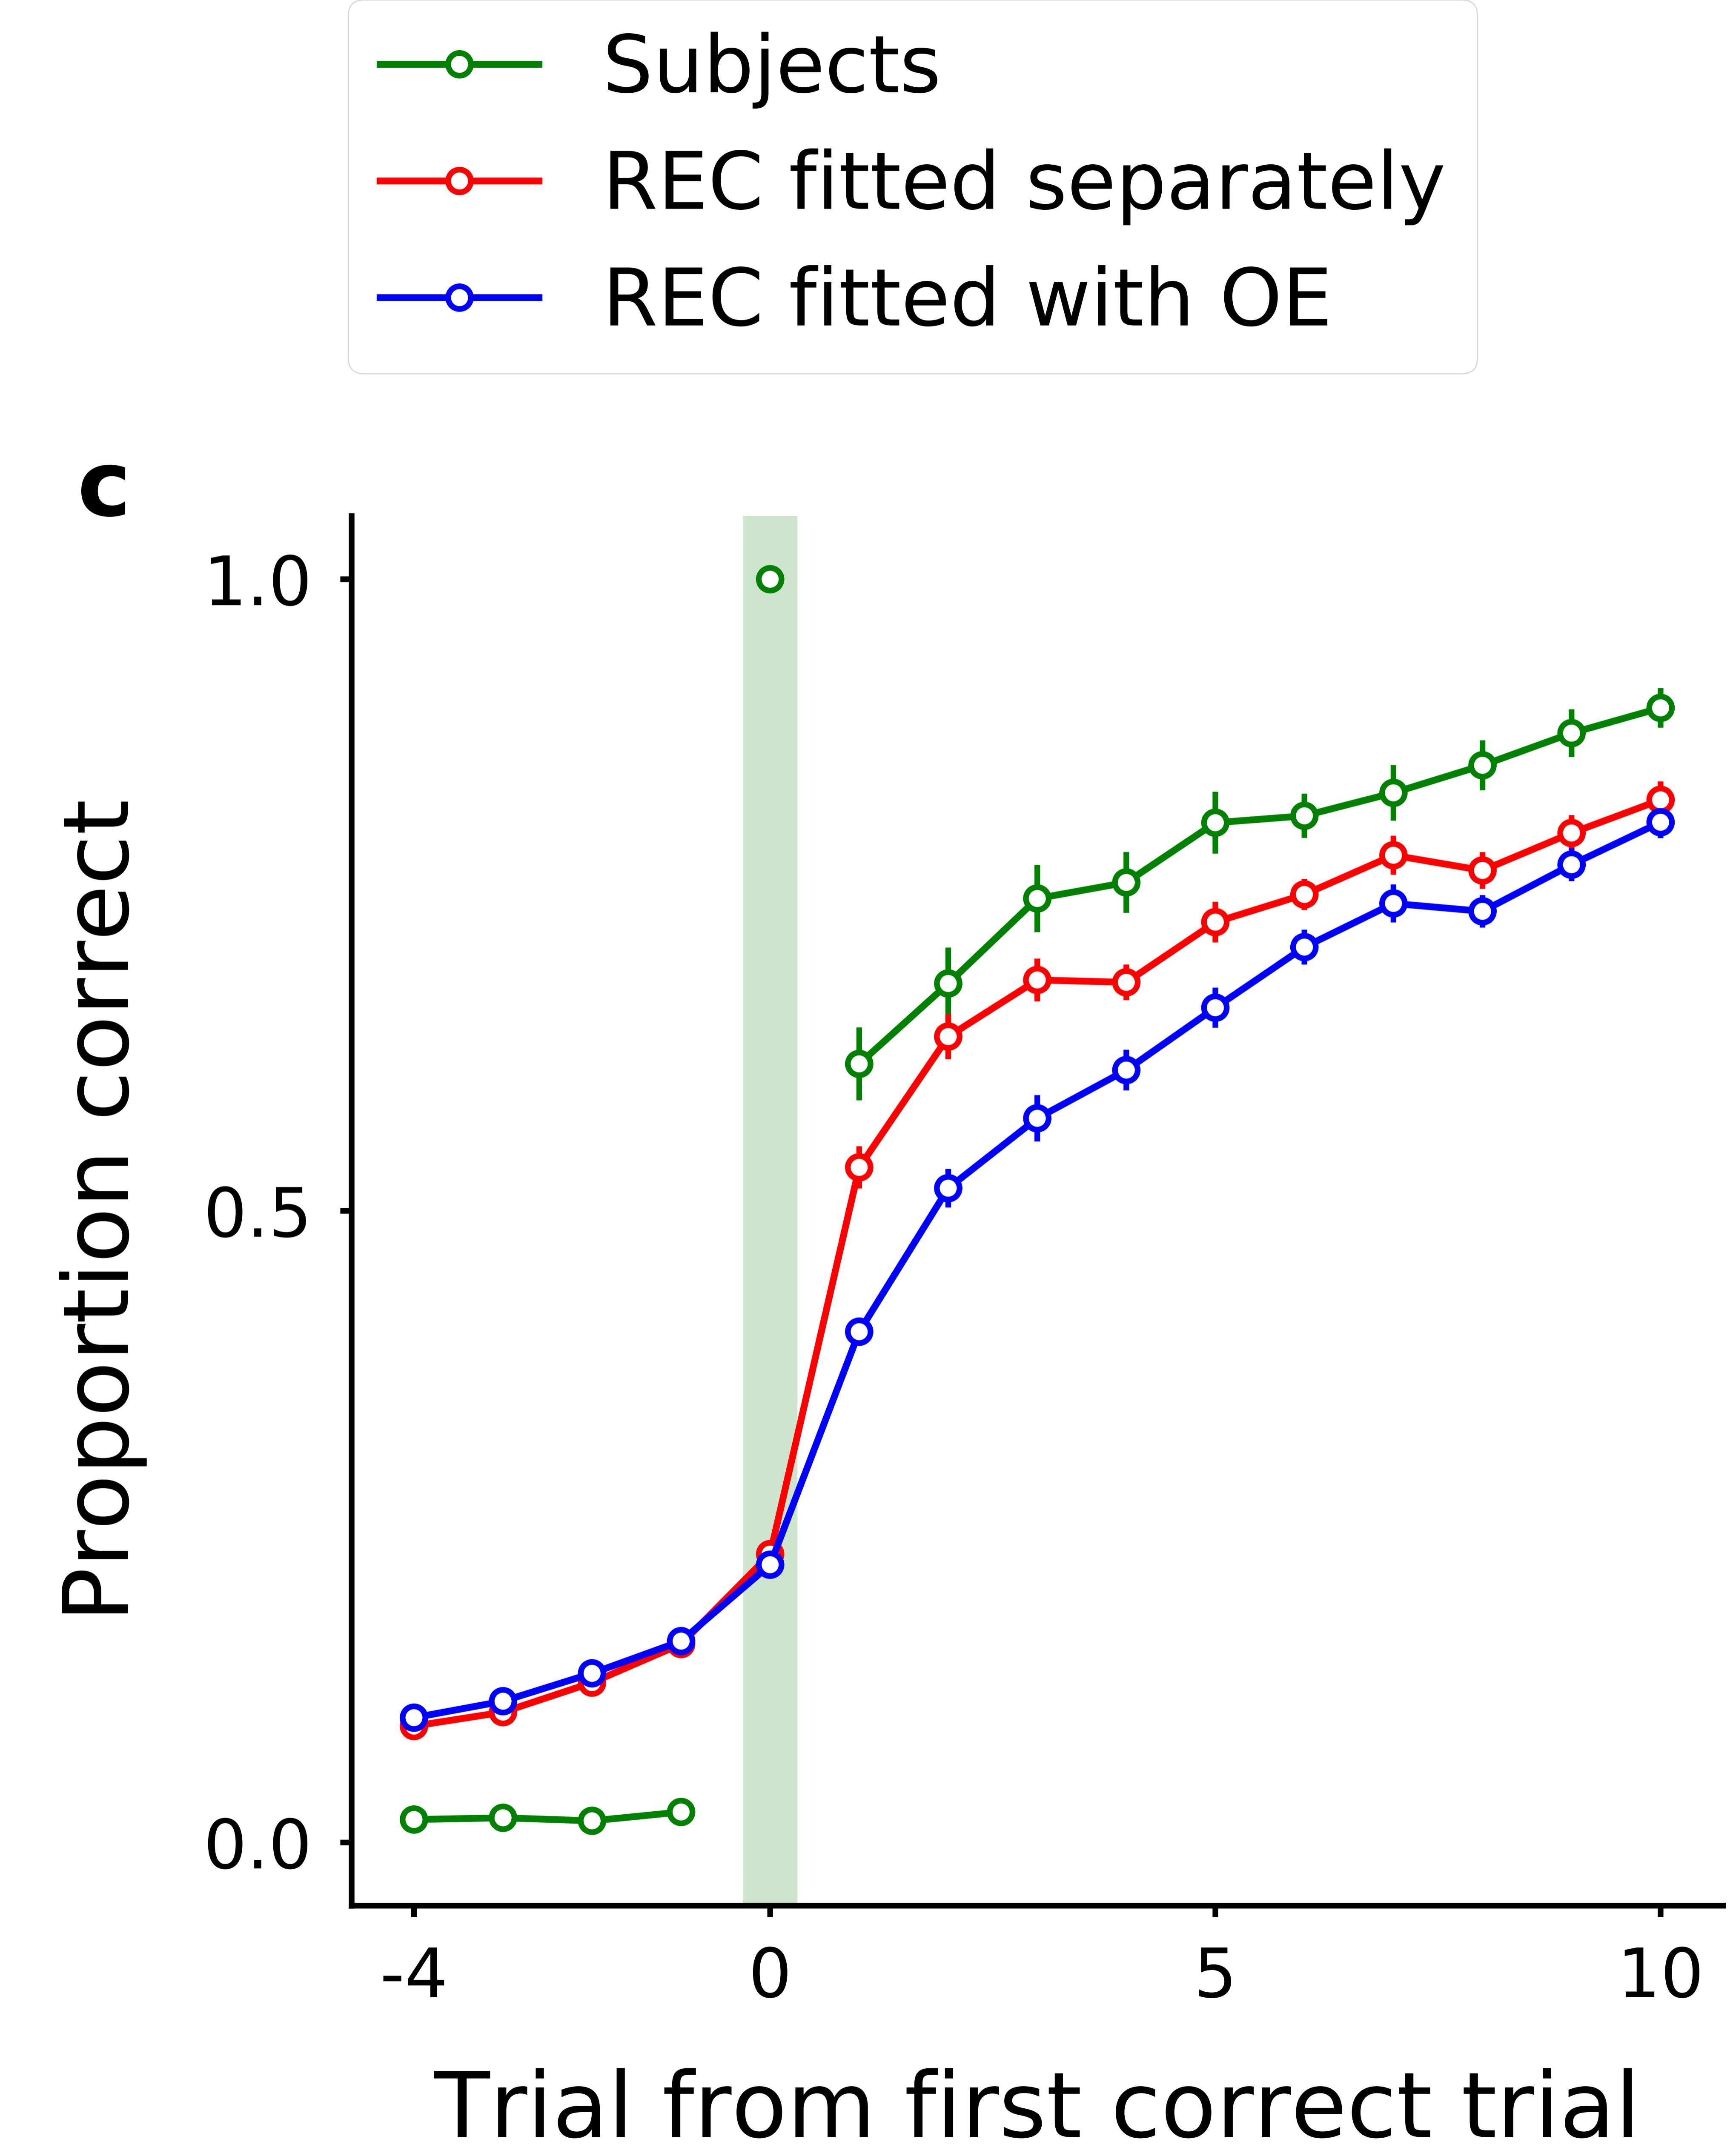

Supplement: supp [file elife-50469-supp-v1.zip › elife_poa_e50469_Figure_5_figure_supplement_3.pdf]

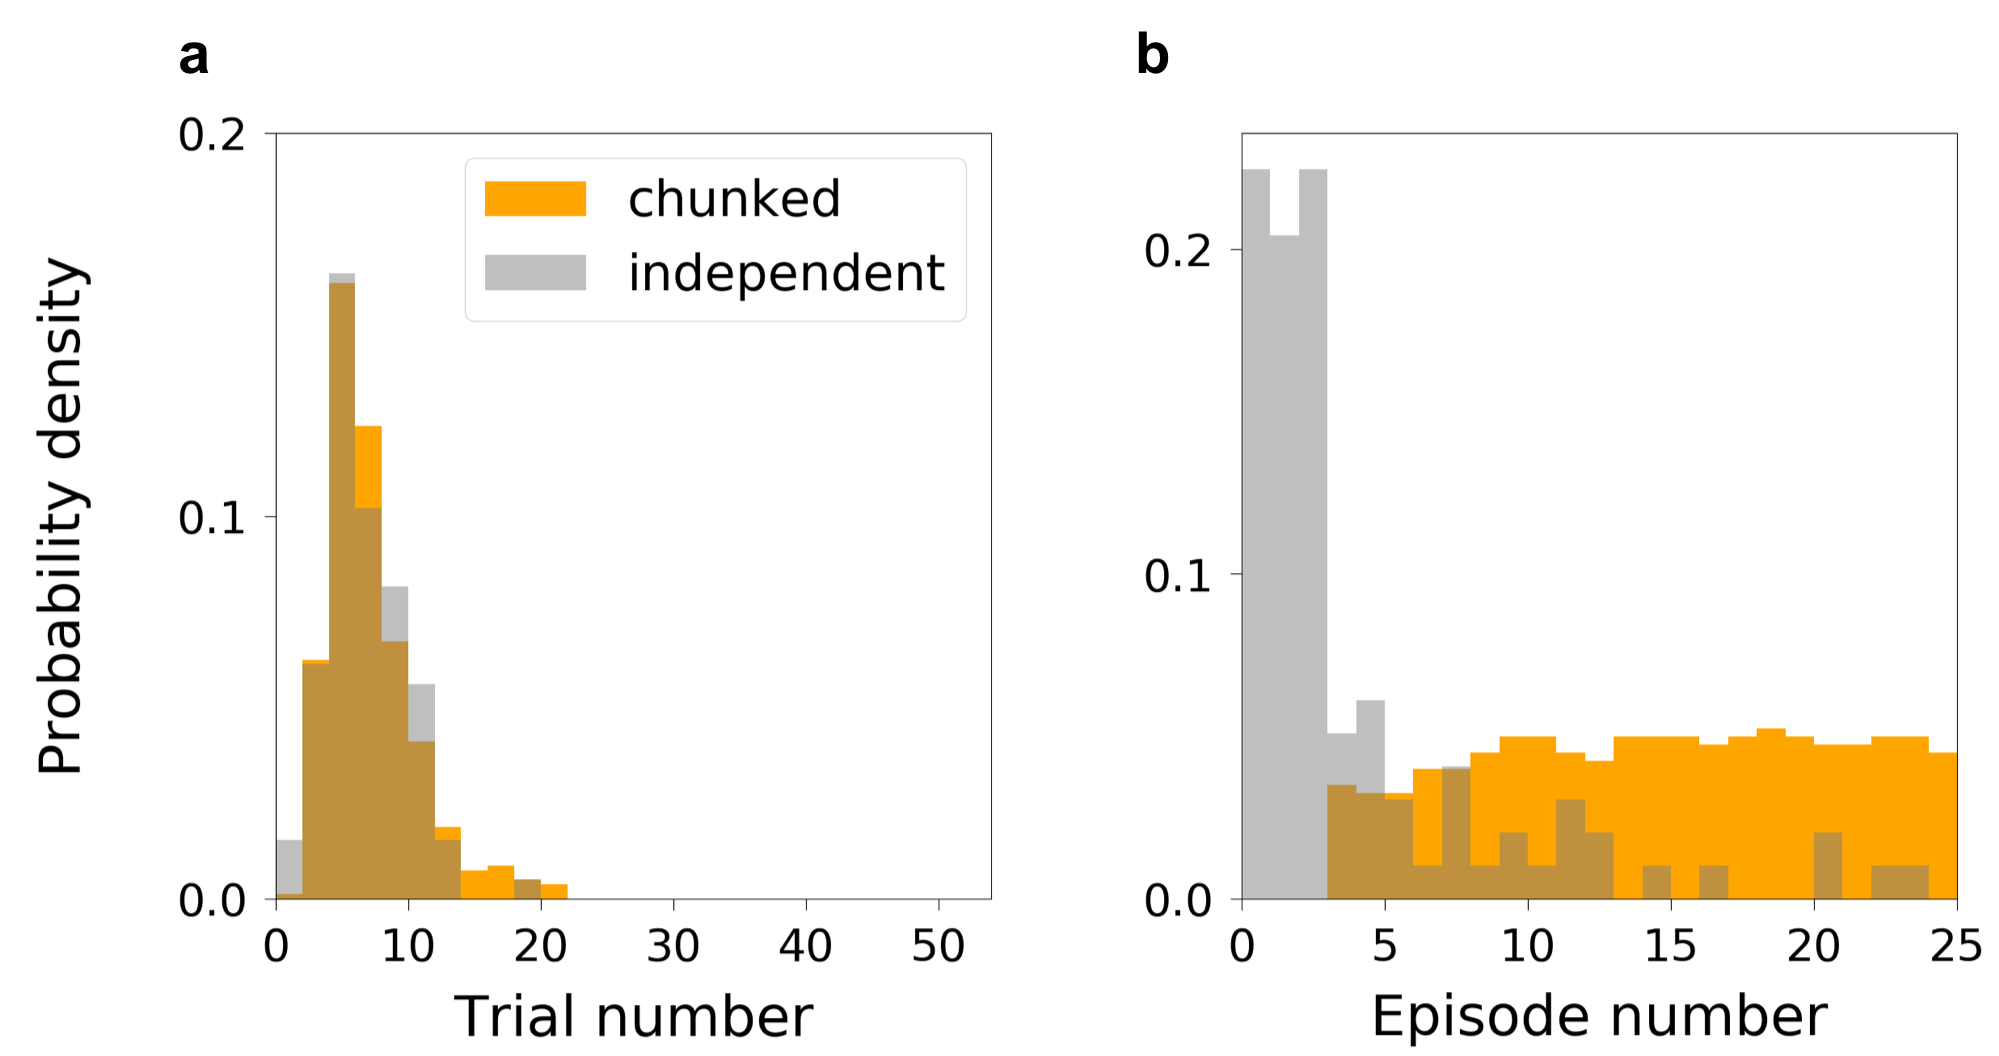

Supplement: supp [file elife-50469-supp-v1.zip › elife_poa_e50469_Figure_6_figure_supplement_1.png]

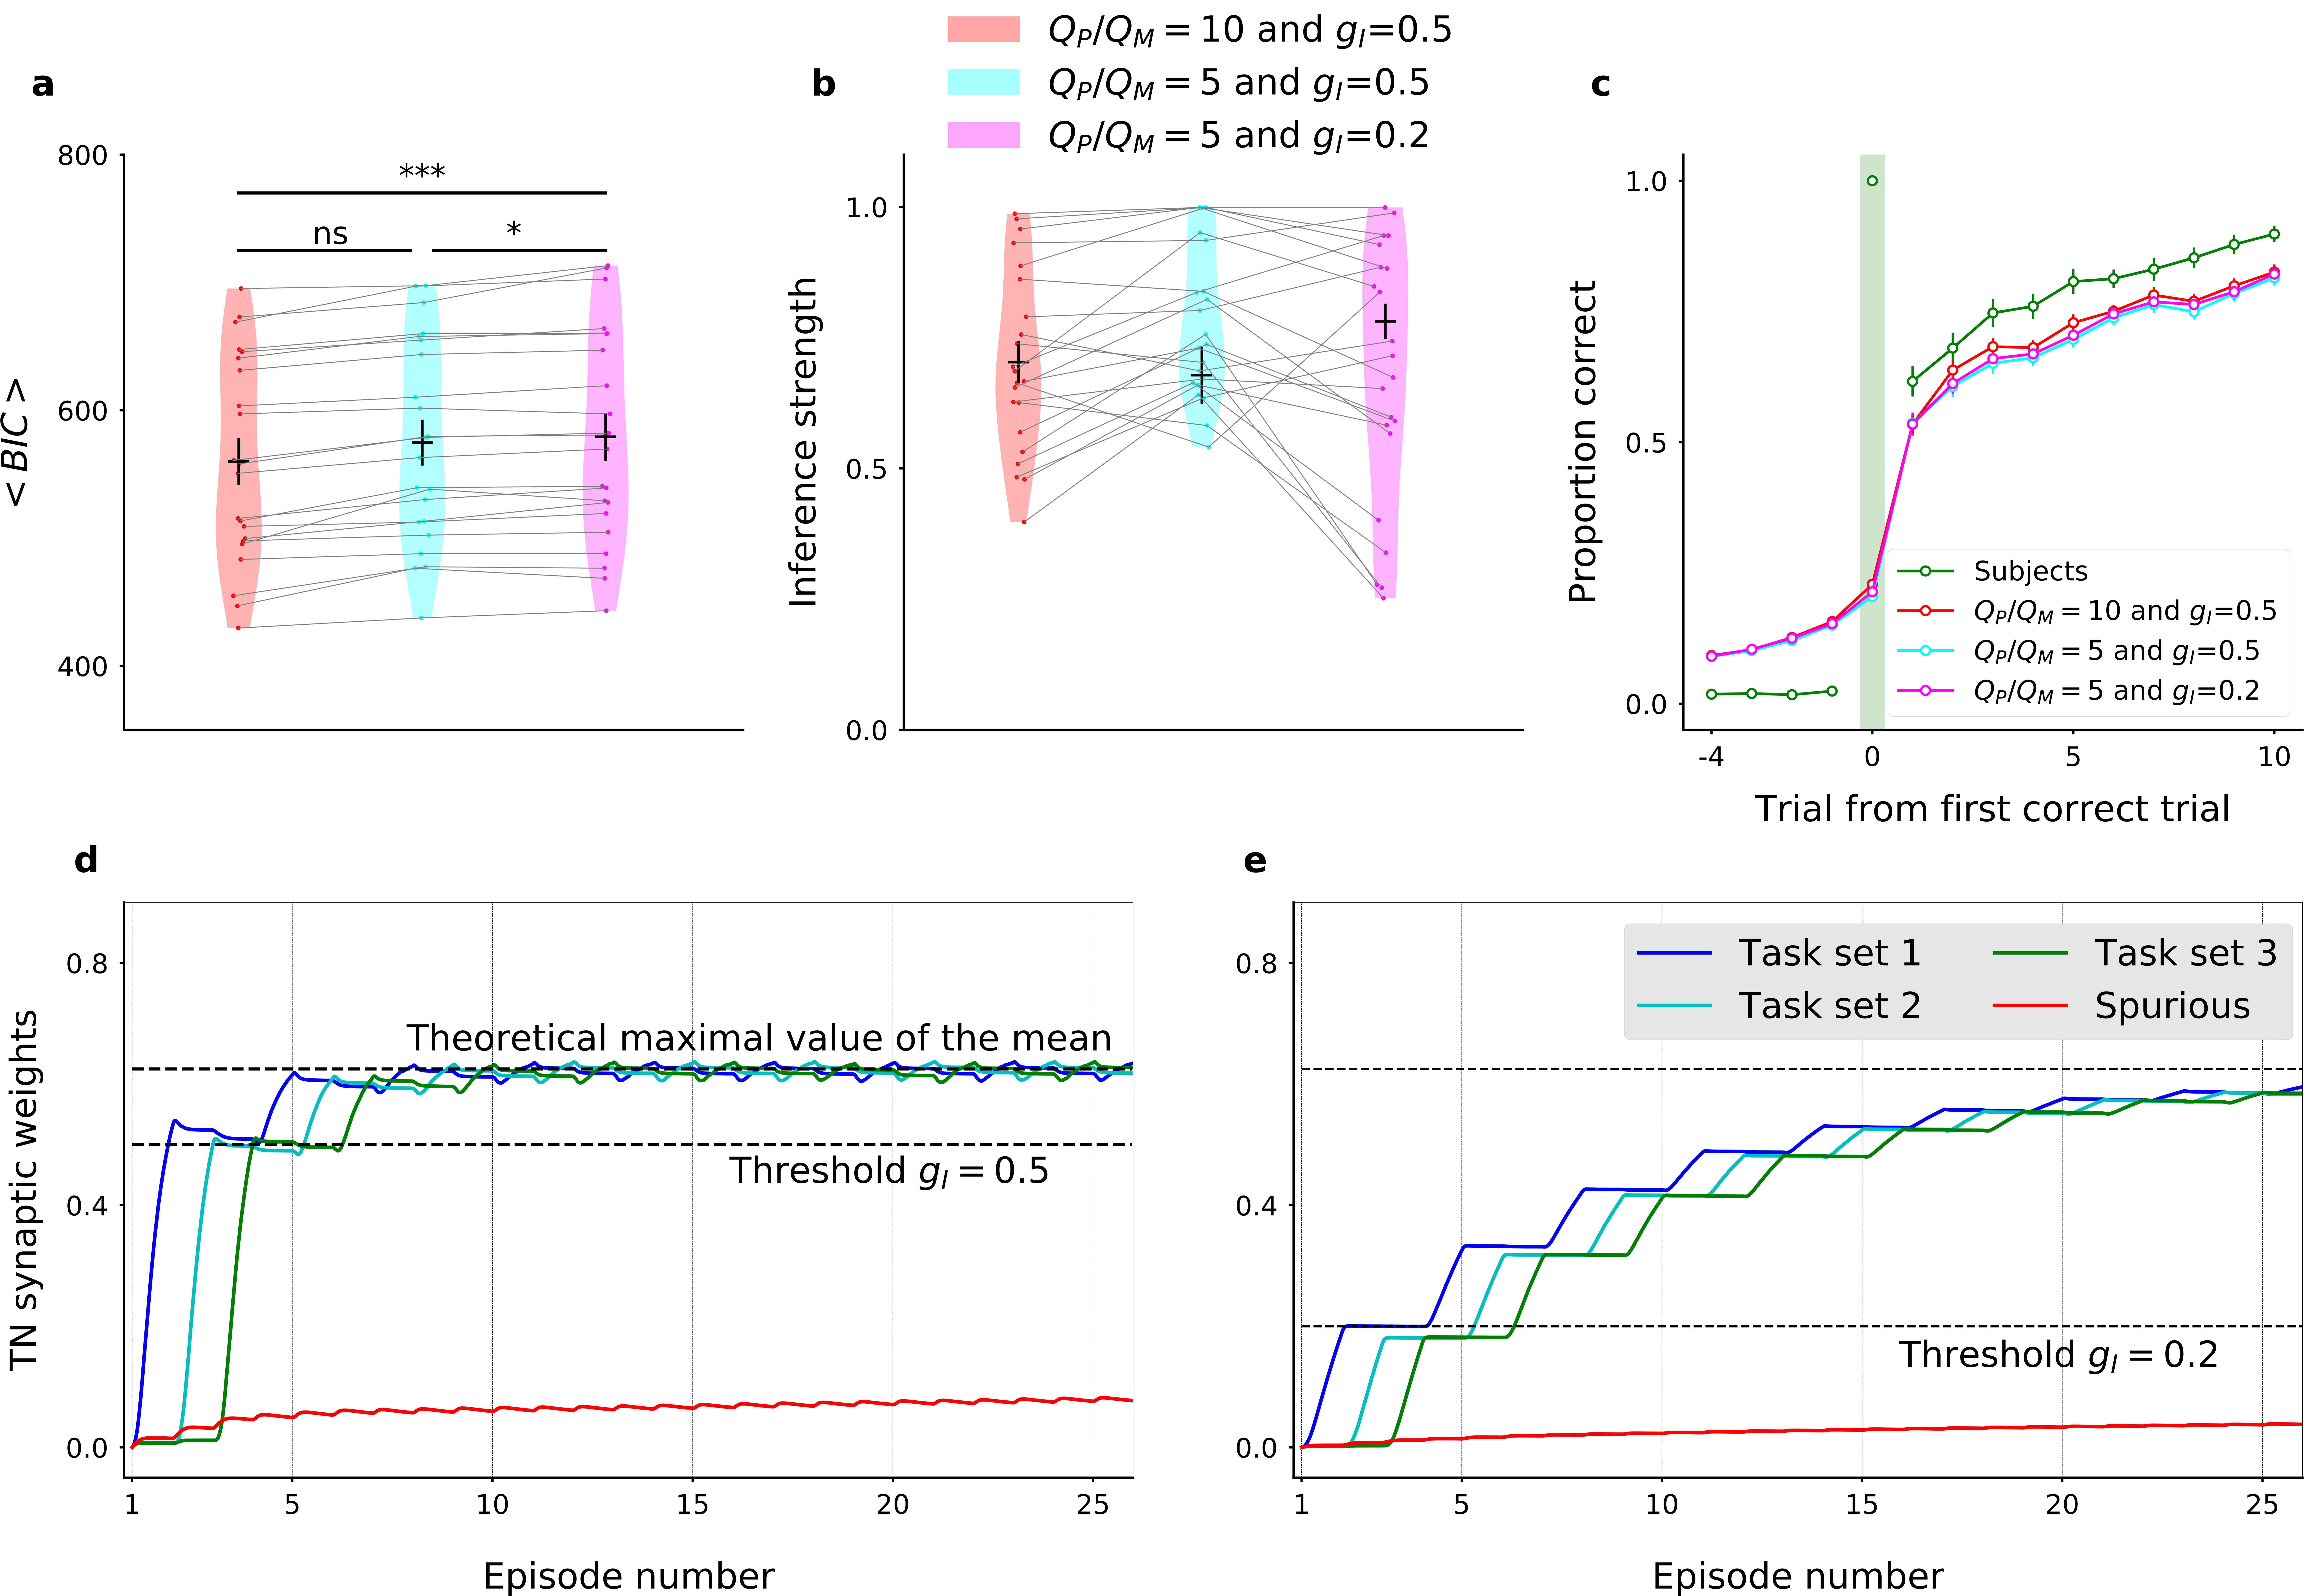

Supplement: supp [file elife-50469-supp-v1.zip › elife_poa_e50469_Figure_5_figure_supplement_2.pdf]
